# 1 Single-deletion-mutant, third-generation rabies viral vectors allow 2 nontoxic retrograde targeting of projection neurons with greatly 3 increased efficiency

4  
5 Lei Jin<sup>1</sup>, Heather A. Sullivan<sup>1</sup>, Mulangma Zhu<sup>1</sup>, Nicholas E. Lea<sup>1</sup>, Thomas K. Lavin<sup>1</sup>, Makoto  
6 Matsuyama<sup>1</sup>, YuanYuan Hou<sup>1</sup>, and Ian R. Wickersham<sup>1\*</sup>

7  
8 1. McGovern Institute for Brain Research, Massachusetts Institute of Technology, Cambridge, MA, USA

9 \*Correspondence.

## 10 11 SUMMARY

12  
13 Rabies viral vectors have become important components of the systems neuroscience  
14 toolkit, allowing both direct retrograde targeting of projection neurons and monosynaptic  
15 tracing of inputs to defined postsynaptic populations, but the rapid cytotoxicity of first-  
16 generation ( $\Delta G$ ) vectors limits their use to short-term experiments. We recently introduced  
17 second-generation, double-deletion-mutant ( $\Delta GL$ ) rabies viral vectors, showing that they  
18 efficiently retrogradely infect projection neurons and express recombinases effectively but  
19 with little to no detectable toxicity; more recently, we have shown that  $\Delta GL$  viruses can be  
20 used for monosynaptic tracing with far lower cytotoxicity than the first-generation system.  
21 Here we introduce third-generation ( $\Delta L$ ) rabies viral vectors, which, like first-generation  
22 vectors, have only a single gene deleted from their genomes (in this case the viral  
23 polymerase gene L) but which appear to be as nontoxic as second-generation ones: using  
24 longitudinal structural and functional two-photon imaging in mouse visual cortex *in vivo*, we  
25 found that they did not kill labeled neurons or noticeably perturb their response properties  
26 over the entire months-long courses of imaging. Although third-generation vectors are  
27 therefore phenotypically very similar to second-generation ones, we show that they have the  
28 major advantage of growing to much higher titers, and this key difference results in 25% -  
29 525% increased numbers of retrogradely labeled neurons *in vivo*. These  $\Delta L$  rabies viral  
30 vectors therefore constitute a new state of the art for minimally perturbative, pathway-  
31 specific expression of recombinases and transactivators in mammalian neurons selected on  
32 the basis of their axonal projections. Because replication of deletion-mutant rabies viruses  
33 within complementing cells is precisely the process that underlies monosynaptic tracing,  
34 the higher replication efficiency of this new class of rabies viral vectors furthermore  
35 suggests the potential to provide the foundation of an improved nontoxic monosynaptic  
36 tracing system.

## 37 38 INTRODUCTION

39  
40 Since their introduction to neuroscience in 2007 (Wickersham et al., 2007a; Wickersham et al., 2007b),  
41 recombinant rabies viral vectors have become widely-adopted tools in neuroscience, allowing "monosynaptic  
42 tracing" of direct inputs to genetically-targeted starting postsynaptic neuronal populations (Jin et al., 2021b;  
43 Wall et al., 2010; Wickersham et al., 2007b) as well as simple retrograde targeting of projection neurons  
44 when injected at the sites of these projection neurons' axonal arborizations (Chatterjee et al., 2018;  
45 Wickersham et al., 2007a). These vectors are now used in a large number of laboratories worldwide and  
46 have contributed to many high-impact studies of a wide variety of neural systems (Foster et al., 2021;  
47 Miyamichi et al., 2011; Reardon et al., 2016; Schwarz et al., 2015; Siu et al., 2021; Smith et al., 2021;  
48 Stephenson-Jones et al., 2016; Wu et al., 2021; Yao et al., 2021).

49 Because first generation (" $\Delta G$ ") rabies viral vectors (which have only the glycoprotein gene G deleted  
50 from their genomes) are cytotoxic (Chatterjee et al., 2018; Jin et al., 2021a; Jin et al., 2021b; Wickersham et  
51 al., 2007a), we recently introduced second-generation, " $\Delta GL$ " rabies viral vectors, which have both the  
52 glycoprotein gene G and the viral polymerase gene L (for "large" protein) deleted from their genomes  
53 (Chatterjee et al., 2018). Because the viral polymerase is absolutely required for transcription of all genes

54 from the rabies viral genome as well as for replication of the viral genome itself (Albertini et al., 2011; Finke  
55 and Conzelmann, 2005; Horwitz et al., 2020; Morin et al., 2013; Ogino and Green, 2019; Te Velthuis et al.,  
56 2021), this additional deletion, by design, reduces gene expression to a minimal level (provided by the few  
57 starting copies of the polymerase protein that are copackaged in each viral particle) that appears to be  
58 completely harmless to the "infected" cells. Because transgene expression is reduced by the same degree,  
59 we inserted the genes for Cre and Flpo recombinase, of which even low levels of expression are sufficient  
60 to cause neuroscientifically-useful downstream effects such as expression of fluorophores or calcium  
61 indicators in labeled cells (Chatterjee et al., 2018). We originally showed that these  $\Delta$ GL vectors are useful  
62 tools for retrograde targeting of projection neurons (Chatterjee et al., 2018), and they have since been used  
63 as such for applications including optogenetics and transcriptomic profiling (Ren et al., 2021; Roy et al., 2021;  
64 Tasic et al., 2018). More recently, we have also shown that  $\Delta$ GL vectors can be complemented *in vivo* by  
65 expression of both G and L *in trans*, yielding a second-generation monosynaptic tracing system with far lower  
66 cytotoxicity than the first-generation version (Jin et al., 2021a).

67 Here we show that deletion of L alone appears to make rabies viral vectors as nontoxic as  $\Delta$ GL ones,  
68 with labeled neurons surviving for at least months with apparently unperturbed visual response properties.  
69 We find that these  $\Delta$ L vectors have a major growth advantage over  $\Delta$ GL ones in cell culture, attaining much  
70 higher titers in complementing cells in culture. This higher replication efficiency translates into the practical  
71 advantage of retrogradely labeling many more projection neurons when injected into these neurons' target  
72 sites *in vivo*.

73

## 74 RESULTS

75

### 76 Construction and characterization of $\Delta$ L rabies virus

77 We began by constructing rabies viral vectors with only the polymerase gene deleted and characterized their  
78 gene expression levels and growth dynamics in cell culture (Figure 1). Beginning with the genome plasmid  
79 of a  $\Delta$ GL virus (Chatterjee et al., 2018), we reinserted the native glycoprotein gene in its original location,  
80 followed by the gene for Cre recombinase (codon-optimized for mouse (Koresawa et al., 2000)) in an  
81 additional transcriptional unit, then produced infectious virus by standard techniques (see Methods). We then  
82 compared the gene expression levels of the resulting virus, RV $\Delta$ L-Cre, to those of first- and second-  
83 generation versions (RV $\Delta$ G-Cre and RV $\Delta$ GL-Cre, respectively) in cell culture (HEK 293T/17 cells) using  
84 immunostaining for Cre as well as for the viral nucleoprotein, the highest-expressed rabies viral protein.

85 As shown in Figure 1A-D, whereas the first-generation ( $\Delta$ G) virus expressed high levels of  
86 nucleoprotein (which accumulated in cytoplasmic inclusions) and Cre (which localized to the nuclei), the  $\Delta$ GL  
87 and  $\Delta$ L viruses had very low expression levels of both Cre and nucleoprotein, with the amount of label for  
88 these proteins appearing much more similar to that seen in uninfected control cells than in cells infected with  
89 the  $\Delta$ G virus. We also found similarly low transgene expression levels for  $\Delta$ L and  $\Delta$ GL viruses expressing  
90 EGFP (Figure S1). However, just as we found previously for  $\Delta$ GL viruses (Chatterjee et al., 2018), the Cre  
91 expressed by RV $\Delta$ L-Cre was sufficient to result in bright labeling of Cre reporter cells (bottom row in panels  
92 A-D).

93 These results led us to predict that  $\Delta$ L viruses would be as nontoxic as  $\Delta$ GL ones, because of their  
94 similarly low expression levels, and also that they would be similarly able to recombine reporter alleles *in*  
95 *vivo* in order to allow downstream expression of useful transgene products such as fluorophores, activity  
96 indicators, or opsins.

97 It remained to be seen, however, whether  $\Delta$ L viruses would have any particular advantage over  $\Delta$ GL  
98 ones for purposes of retrogradely targeting neurons. Specifically, if they could not be produced at significantly  
99 higher titers, they could be expected to label similar numbers of projection neurons, making  $\Delta$ L vectors a  
100 mere curiosity of purely academic interest and with no relevance to neuroscientists. However, if they could  
101 be grown to much higher titers than  $\Delta$ GL vectors, that could be expected to translate to the ability to  
102 retrogradely label many more projection neurons, a desirable characteristic indeed for a tool for retrograde  
103 targeting.

104 To examine this, we directly compared the ability of  $\Delta$ L virus to replicate in complementing cells with  
105 that of  $\Delta$ GL and  $\Delta$ G viruses (Figure 1E-F). We infected cell lines expressing L, G, or both with the three  
106 different generations of virus, at two different multiplicities of infection (MOI, measured in infectious units per  
107 cell): either very low (MOI = 0.01, "multi-step growth curves" (Gomme et al., 2010; Wang and Bushman,  
108 2006)) or high (MOI = 1, "single-step growth curves". Following a one-hour incubation in the presence of the

109 viruses, we washed the cells twice with DPBS and applied fresh medium, then collected supernatant samples  
110 every 24 hours for five days after infection, then titered the samples on reporter cells.

111 As seen in Figure 1E-F, the results were clear: whereas the  $\Delta$ GL virus (on cells expressing both G  
112 and L) never accumulated to titers higher than  $2.37 \times 10^6$  iu/mL in either experiment, the  $\Delta$ L virus grew to  
113 maximal titers of  $6.51 \times 10^6$  iu/mL (at MOI of 0.01) and  $1.96 \times 10^7$  iu/mL (at MOI of 1) on the same cell line  
114 (expressing both G and L) and considerably higher (maximal titers of  $1.31 \times 10^7$  iu/mL at MOI=0.01 and  $2.60 \times 10^7$   
115 iu/mL at MOI=1) on cells expressing L alone. The  $\Delta$ G virus grew to similarly high (or slightly higher, in the  
116 MOI=1 case) titers to the  $\Delta$ L one:  $6.83 \times 10^6$  iu/mL at MOI=0.01 and  $3.03 \times 10^7$  iu/mL at MOI=1, suggesting that  
117 single-deletion-mutant rabies viruses may in general be easier to make at high titers than viruses with multiple  
118 deleted genes. In non-complementing cells, by contrast, no such replication of any of these viruses ( $\Delta$ L,  $\Delta$ GL,  
119 or  $\Delta$ G) occurred (Figure S2).

120 These findings that a  $\Delta$ L rabies virus could be grown to 11-fold higher titer than a matched  $\Delta$ GL one  
121 led us to predict that  $\Delta$ L viruses would be superior tools for retrograde targeting *in vivo*, because their much  
122 higher titers would result in retrograde infection of many more projection neurons.

123

### 124 **Retrograde targeting *in vivo***

125 To test this prediction, we made matched preparations of  $\Delta$ GL and  $\Delta$ L viruses expressing either Cre or Flpo  
126 (mouse-codon-optimized Flp recombinase (Raymond and Soriano, 2007)), then injected each of the four  
127 viruses in the somatosensory thalami of reporter mice (Ai14 (Madisen et al., 2010) for the Cre viruses, Ai65F  
128 (Daigle et al., 2018) for the Flpo ones; both lines express tdTomato following recombination by the respective  
129 recombinase). We sacrificed the mice at either 7 days or 4 weeks after injection, sectioned and imaged the  
130 brains by confocal microscopy, and counted the numbers of retrogradely labeled cells in cortex. Figure 2  
131 shows the results.

132 As seen in panels 2B-E, for both recombinases, and at both timepoints, the  $\Delta$ L viruses significantly  
133 outperformed the  $\Delta$ GL ones. For the Flpo viruses, the difference was dramatic: at the 1-week timepoint, the  
134  $\Delta$ L virus labeled 24 times as many cells as the  $\Delta$ GL one (although this difference was not statistically  
135 significant due to high variance in the  $\Delta$ L cohort: single factor ANOVA,  $p=0.275$ ,  $n = 8$  mice each group); by  
136 the 4-week timepoint, the  $\Delta$ L-Flpo virus had labeled 6.25 times as many cells as the  $\Delta$ GL counterpart, a  
137 difference that was extremely significant (single factor ANOVA,  $p=3.21 \times 10^{-4}$ ,  $n = 8$  mice each group). For the  
138 Cre viruses, the difference was smaller, presumably due a ceiling effect (see Discussion), but still highly  
139 significant: at 1 week, the  $\Delta$ L-Cre virus had labeled 1.40 times as many cells as  $\Delta$ GL-Cre (single factor  
140 ANOVA,  $p=4.20 \times 10^{-3}$ ;  $n = 4$  mice each group); at the 4-week timepoint, the  $\Delta$ L-Cre virus had labeled 1.25  
141 times as many cells as  $\Delta$ GL-Cre (single factor ANOVA,  $p=7.38 \times 10^{-4}$ ,  $n = 4$  mice per group).

142 We also made some injections of RV $\Delta$ L-Cre, in thalami of Ai14 mice, with the much longer survival  
143 times of 4 or 6 months (Fig 2F-G). The results at both of these longer survival times appeared very similar to  
144 those at the shorter ones. Consistent with extensive prior literature on corticothalamic neurons (Alitto and  
145 Usrey, 2003; Rockland, 2021; Rouiller and Welker, 2000) and with our previous results with corticothalamic  
146 injections of  $\Delta$ G and  $\Delta$ GL viruses (Chatterjee et al., 2018; Wickersham et al., 2007a), the cells labeled in  
147 cortex by both viruses at all timepoints were pyramidal neurons in layer 6, with a few in layer 5. Furthermore,  
148 labeled neurons all appeared morphologically normal even months after injection, with the fine processes of  
149 axons and dendrites, including individual spines (rightmost images in 2F-G) clearly visible and without  
150 blebbing or other obvious abnormalities.

151 As a further test of the flexibility of  $\Delta$ L vectors, we made a version expression the tetracycline  
152 transactivator (tTA) and injected it in the thalamus of Ai63 reporter mice (in which TRE-tight drives tdTomato  
153 expression) (Daigle et al., 2018). As seen in Figure S3, thousands of cortical thalamic cells were found  
154 retrogradely labeled at both 1-week and 4-week survival times, with no significant difference between the  
155 numbers at the two timepoints (single factor ANOVA,  $p = 0.772$ ,  $n = 4$  mice per group).

156

### 157 **Longitudinal structural two-photon imaging *in vivo***

158 Because examining only postmortem tissue can be very misleading when attempting to determine whether  
159 a virus is nontoxic (see Jin et al. '21 (Jin et al., 2021a) for a detailed case study), we conducted longitudinal  
160 two-photon imaging of RV $\Delta$ L-labeled neurons *in vivo* (Figure 3). We injected either RV $\Delta$ GL-Cre (Chatterjee  
161 et al., 2018) or RV $\Delta$ L-Cre in primary visual cortex (V1) of Ai14 reporter mice, then imaged the resulting  
162 tdTomato-expressing neurons at or near the injection site beginning 7 days after injection and continuing  
163 every 7 or 14 days until 16 weeks postinjection. As seen in Figure 3, the results using the two viruses were  
164 very similar. For both  $\Delta$ GL and  $\Delta$ L viruses, the numbers of visibly labeled neurons increased significantly

165 between 1 week and 4 weeks postinjection (Figure 3D, G), by 56.27% for  $\Delta$ GL and by 67.77% for  $\Delta$ L (paired  
166 t-tests,  $p = 1.319\text{E-}04$  for  $\Delta$ GL,  $p = 1.003\text{E-}05$  for  $\Delta$ L,  $n = 8$  FOVs for each virus). Also for both viruses, the  
167 numbers of visibly labeled neurons remained nearly completely constant from the 4-week timepoint onward  
168 through all remaining imaging sessions (Figure 3E, H) (with the number of labeled cells at the 4-week  
169 timepoint being not significantly different than that at the 12-week timepoint for the  $\Delta$ L virus (paired t-test,  $p$   
170  $= 0.1327$ ,  $n = 8$  FOVs) and slightly (0.5%) lower for the  $\Delta$ GL virus (paired t-test,  $p = 0.0056$ ,  $n = 8$  FOVs).  
171 See File S3 for all counts and statistical comparisons; see also Video S1 for a rendering of a group of  $\Delta$ L-  
172 labeled neurons at 2 weeks and again at 10 weeks.  
173

### 174 Longitudinal functional two-photon imaging *in vivo*

175 We went on to examine the functional properties of RV $\Delta$ L-labeled neurons *in vivo*. As for the structural  
176 imaging (see above), we injected RV $\Delta$ L-Cre in the primary visual cortices of reporter mice, in this case mice  
177 that express the calcium indicator GCaMP6s (Chen et al., 2013) after Cre recombination (Figure 4).  
178 Beginning one week later, we began imaged the calcium signals in the labeled neurons in a series of imaging  
179 sessions that continued until 16 weeks postinjection, in the awake mice viewed visual stimuli consisting of  
180 drifting gratings of different orientations and frequencies. Just as we found previously for  $\Delta$ GL viruses  
181 (Chatterjee et al., 2018; Jin et al., 2021b), we found no signs of dysfunction in cells labeled by the third-  
182 generation vector for as long as we followed them (Figure 4; see also Figures S4 and S5. See File S4 for all  
183 counts and statistical comparisons and Video S2 for an example of calcium responses in a group of cortical  
184 neurons 16 weeks after injection of RV $\Delta$ L-Cre).  
185

### 186 DISCUSSION

187  
188 Here we have shown that deletion of just the polymerase gene renders rabies viral vectors nontoxic, like  
189 second-generation ( $\Delta$ GL) vectors, but makes them much more efficient at replicating within complementing  
190 cells in culture. This ability to be grown to much higher titers results in significantly increased transduction of  
191 projection neurons within a given pathway. This more comprehensive access to projection neurons will  
192 increase the yield and efficacy of systems neuroscience experiments that depend on the retrograde targeting  
193 approach.

194 In the corticothalamic pathway that we have examined here, the advantage of a  $\Delta$ L vector over the  
195  $\Delta$ GL equivalent was clearest in the case of the Flpo-expressing versions, with the  $\Delta$ L vector labeling 6.25  
196 times as many neurons as the  $\Delta$ GL one did at four weeks postinjection. This ratio is of the same order of  
197 magnitude as the ratio of the titers of the injected Flpo viruses (14.4: see Methods). By contrast, for the Cre-  
198 expressing versions, the advantage of the  $\Delta$ L vector over the  $\Delta$ GL one was more modest, labeling 1.25 times  
199 as many cells, even though the ratio of the titers of these Cre vectors was even higher (20.5). Because the  
200 absolute numbers of retrogradely labeled neurons, as well as the titers, were much higher for the Cre viruses  
201 than for the corresponding Flpo ones, we presume that the smaller advantage of the  $\Delta$ L version seen in this  
202 case was because of a ceiling effect, with the  $\Delta$ GL-Cre virus already labeling most of the available neurons  
203 in this pathway.

204 One could certainly argue that the much higher titers that we are easily able to obtain with  $\Delta$ L vectors  
205 could also, in theory, potentially be achieved with  $\Delta$ GL vectors, if enough effort were put into generating and  
206 testing producer cell lines expressing both G and L in order to find one that expressed the two genes at just  
207 the right ratio and levels. In practice, however, this hypothetical future research effort does not detract from  
208 the fact that the best currently-existing preparations of  $\Delta$ L rabies viral vectors label many more cells than do  
209  $\Delta$ GL ones, making them the better choice for retrograde targeting applications.

210 We note that, although here we have only demonstrated the use of  $\Delta$ L rabies viral vectors in mice,  
211 they are also highly likely to work in a wide variety of mammalian species, because, apart from their shorter  
212 RNA genomes, the structural properties of second- and third-generation rabies viral particles are identical to  
213 those of first-generation ones, which have been successfully used in diverse mammalian species including  
214 rats (Cruz et al., 2021), cats (Connolly et al., 2012; Liu et al., 2013), ferrets (Hasse et al., 2019), and  
215 macaques (Bragg et al., 2017; Briggs et al., 2016; Lyon et al., 2010; Nassi and Callaway, 2006, 2007; Nassi  
216 et al., 2006; Siu et al., 2021; Yarch et al., 2017) (and even in fish (Dohaku et al., 2019; Satou et al., 2021;  
217 Zhu et al., 2009) and frogs (Faulkner et al., 2021)).

218 Our findings here that  $\Delta$ L rabies viruses have extremely low expression levels and do not replicate  
219 within (or spread beyond, *in vivo*) non-complementing cells are entirely consistent with similar findings in cell  
220 culture in a recent report on an L-deficient rabies virus encoding firefly luciferase (Nakagawa et al., 2017).

221  
222  
223  
224  
225  
226  
227  
228  
229  
230  
231  
232  
233  
234  
235  
236  
237  
238  
239  
240  
241  
242  
243  
244  
245  
246  
247  
248  
249  
250  
251  
252  
253  
254  
255  
256  
257  
258  
259  
260  
261  
262  
263  
264  
265  
266  
267  
268  
269  
270  
271  
272  
273  
274  
275  
276

A note about safety: our results strongly suggest that  $\Delta L$  rabies viruses are unable to replicate in the absence of complementation and moreover are harmless to any cells that they transduce. However, a mixture of  $\Delta L$  and  $\Delta G$  viruses could pose a safety risk, because such viruses will be mutually complementary. Care must therefore be taken to avoid contamination between  $\Delta L$  and  $\Delta G$  constructs – either packaged viruses or the genome plasmids used to make them – which would have the potential to create a self-complementing replication-competent mixture (see Hidaka et al. (Hidaka et al., 2018) for an example of such a self-complementing mixture).

Finally, we have recently shown (Jin et al., 2021b) that second-generation ( $\Delta GL$ ) rabies viral vectors can spread transsynaptically when complemented by provision of both G and L *in trans*. That is, complementation of an L-deficient rabies virus (in that case, a G- and L-deficient virus that is also complemented by G) allows it to spread beyond initially infected cells *in vivo*. It is therefore reasonable to infer that provision of L *in trans* should allow third-generation,  $\Delta L$  rabies viral vectors to spread beyond initially infected cells, given that we have shown here that such complementation in cell culture allows  $\Delta L$  viruses to replicate very efficiently. We have also shown here, with the longitudinal two-photon imaging of labeled neurons, that  $\Delta L$  viruses do not spread beyond initially infected cells *in vivo* in the absence of complementation. Collectively, our results therefore suggest the outlines of a third-generation monosynaptic tracing system based on  $\Delta L$  vectors complemented with L expression *in trans*. However, genetic targeting of a  $\Delta L$  vector to specific starting cell types might appear elusive: in the first- and second-generation systems (Jin et al., 2021b; Wickersham et al., 2007b), this targeting is achieved by packaging the rabies viral particles with an avian retroviral envelope protein (EnvA) instead of its own envelope glycoprotein, so that they can only infect cells that have been engineered to express EnvA's cognate receptor. On the face of it, this pseudotyping strategy requires that G be deleted from the rabies viral genome, because expression of G by the virus within the EnvA-expressing producer cells would result in the production of virions with membranes populated by a mixture of EnvA and the rabies viral glycoprotein. If this challenge could be overcome, our present findings that  $\Delta L$  viruses replicate more readily in complementing cells, which is the fundamental process central to monosynaptic tracing (Wickersham et al., 2007b), suggest that a third-generation monosynaptic tracing system could be more efficient than the second-generation one.

## METHODS

All experiments involving animals were conducted according to NIH guidelines and approved by the MIT Committee for Animal Care. Mice were housed 1-5 per cage under a normal light/dark cycle for all experiments.

### Cloning

The third-generation rabies viral vector genome plasmids pRV $\Delta L$ -5Cre, pRV $\Delta L$ -5Flpo, and pRV $\Delta L$ -5tTA (Addgene 182964, 182965, and 182966) (the "5" denoting the position of the transgene relative to the other genes in the viral genome) was made by replacing the mCre gene in pRV $\Delta GL$ -4Cre (Chatterjee et al., 2018) (Addgene 98039) with the SAD B19 glycoprotein gene from pCAG-B19G (Chatterjee et al., 2018) (Addgene 59921) and either the mCre, Flpo (from pRV $\Delta G$ -4Flpo (Addgene 98040)), or tTA (from pAAV-syn-FLEX-splitTVA-EGFP-tTA (Liu et al., 2017) (Addgene 100798)) gene, separated by endogenous rabies viral transcriptional stop and start signals, using seamless cloning (InFusion (Takara) or HiFi (NEB)).

The piggyBac vector pB-TREtight-EGFP (Addgene 182967) was made by cloning the TRE-tight element from pAAV-TREtight-mTagBFP2-B19G (Liu et al., 2017) and the EGFP gene into pB-CAG-TEVp-IRES-mCherry (Addgene 174377) in place of the CAG-TEVp-IRES-mCherry sequences using HiFi seamless cloning (NEB).

The piggyBac plasmid pB-CAG-B19G-IRES-EGFP-WPRE-BGHpA (Addgene 178517) was made by cloning the CAG promoter from pCAG-B19G (Addgene 59921), the SAD B19 L gene, the EMCV IRES (Gallardo et al., 1997), the mCherry (Shaner et al., 2004) gene, and the woodchuck post-transcriptional regulatory element and bovine growth hormone polyadenylation signal from pCSC-SP-PW-GFP (Addgene 12337), into PB-CMV-MCS-EF1-Puro (System Biosciences #PB510B-1).

### Cell lines

The BHK-B19G3 cell line, expressing the SAD B19 strain rabies virus glycoprotein gene, was made by resorting BHK-B19G2 cells (Wickersham et al., 2010) on a BD FACS Aria cell sorter and retaining the

277 brightest 2% of EGFP-positive cells as well as the next-brightest 18%. Following the sort, both populations  
278 were expanded and refrozen, then thawed and tested for their efficacy at supporting replication of  $\Delta G$  virus;  
279 the second-brightest population ("BHK-B19G3\_2") was found to result in higher titers and is referred to  
280 here as BHK-B19G3.

281 The BHK-B19L cell line, expressing the SAD B19 strain rabies virus polymerase gene, was made  
282 by transfecting BHK-21 cells (ATCC CCL-10) with pCAG-hypBase (Jin et al., 2021a) and pB-CAG-B19L-  
283 IRES-mCherry-WPRE-BGHpA (Jin et al., 2021b) using Lipofectamine 2000 (Thermo Fisher 11668019),  
284 then expanding the cells and sorting on a FACS Aria sorter (BD) to collect the brightest 5%, as well as the  
285 next brightest 5%, of mCherry-expressing cells. The two collected populations were expanded and  
286 refrozen, then thawed and tested for their efficacy at supporting replication of  $\Delta L$  virus; the second-brightest  
287 population ("BHK-B19L\_2") was found to result in higher titers and is referred to here as BHK-B19L.

288 The BHK-B19L-G cell line, expressing the SAD B19 strain rabies virus polymerase and glycoprotein  
289 genes, was made by transfecting BHK-B19L cells (see above) with pCAG-hypBase and pB-CAG-B19G-  
290 IRES-EGFP-WPRE-BGHpA (see above), then expanding and sorting on a BD FACS Aria, keeping the  
291 brightest 5%, as well as the next brightest 5%, of EGFP-expressing cells which also expressed mCherry.  
292 The sorted cells were expanded and refrozen, then thawed and tested for their efficacy at supporting  
293 replication of  $\Delta GL$  virus; the brightest population ("BHK-B19L-G\_1") was found to result in higher titers and  
294 is referred to here as BHK-B19L-G.

295 The 293T-TREtight-EGFP cell line for titering tTA-expressing viruses was made by transfecting  
296 HEK 293T/17 cells with pCAG-hypBase and pB-TREtight-EGFP (described above), then expanded and  
297 sorted on a BD FACS Aria, excluding the brightest 2% of EGFP cells, and keeping four of the next brightest  
298 EGFP cell populations. The sorted cells were expanded, frozen, and then thawed for testing their efficacy  
299 at titering  $\Delta L$ -tTA virus. The fourth-brightest tranche of cells was used for subsequent titering of  $\Delta L$ -tTA  
300 virus.

301

### 302 Rabies virus production and titering

303 The first-generation vector RV $\Delta G$ -4Cre, the second-generation vectors RV $\Delta GL$ -4Cre and RV $\Delta GL$ -4Flpo,  
304 and the third-generation vectors RV $\Delta L$ -5Cre, RV $\Delta L$ -5Flpo, and RV $\Delta L$ -5tTA were rescued as described  
305 previously (Chatterjee et al., 2018) using genome plasmids pRV $\Delta GL$ -4Cre, pRV $\Delta GL$ -4Flpo, pRV $\Delta L$ -5Cre,  
306 pRV $\Delta L$ -5Flpo, and pRV $\Delta L$ -5tTA, respectively. For simplicity, these viruses are referred to in this manuscript  
307 as RV $\Delta G$ -Cre, RV $\Delta GL$ -Cre, RV $\Delta GL$ -Flpo, RV $\Delta L$ -Cre, RV $\Delta L$ -Flpo, and RV $\Delta L$ -tTA, omitting the numbers  
308 denoting the positions of the transgenes within the viral genomes. Rescue supernatants were collected and  
309 filtered as described (Wickersham and Sullivan, 2015), titered on the reporter cell lines 293T-FLEX BC (for  
310 Cre viruses) or 293T-F14F15S-BC (for Flpo viruses) (Jin et al., 2021a) as described (Wickersham et al.,  
311 2010), then used to infect BHK-B19G3, BHK-B19L-G, or BHK-B19L cells (see above) at multiplicities of  
312 infection ranging from 0.1 to 1. Supernatants from these "P1" plates were collected and titered as  
313 described (Wickersham and Sullivan, 2015); in some cases, these were used for a similar second passage  
314 ("P2"). Purification and concentration of either P1 or P2 supernatants was as described (Wickersham et al.,  
315 2010), with supernatants treated with benzonase (Sigma 71206) (25 minute incubation at 37°C with 30  
316 units/ml at) before ultracentrifugation. Concentrated viruses were aliquoted and frozen at -80°C. Rabies  
317 viruses were titered on reporter cells (293T-FLEX-BC for Cre viruses, 293T-F14F15S-BC for Flpo viruses,  
318 293T-TREtight-EGFP (see above) for RV $\Delta L$ -tTA) as described (Wickersham et al., 2010), using a LUNA-II  
319 cell counter (Logos Biosystems) instead of a hemocytometer for counting cells, and in some cases using  
320 two-fold (as opposed to ten-fold) dilution series for more precise comparisons of titers.

321

### 322 Immunostaining, imaging, and flow cytometry of cultured cells

323 For anti-nucleoprotein and anti-Cre staining (for Figure 1): HEK 293T/17 (ATCC 11268) cells were plated  
324 on poly-L-lysine-coated coverslips in 24-well plates, then infected the following day with serial dilutions of  
325 RV $\Delta G$ -4Cre (Chatterjee et al., 2018), RV $\Delta GL$ -4Cre (Chatterjee et al., 2018), or RV $\Delta L$ -5Cre. Three days  
326 after infection, cells were fixed with 2% paraformaldehyde, washed repeatedly with  
327 blocking/permeabilization buffer (0.1% Triton-X (Sigma) and 1% bovine serum albumin (Sigma) in PBS),  
328 then labeled with a 1:100 dilution of anti-nucleoprotein monoclonal antibody blend (Light Diagnostics  
329 Rabies DFA Reagent, EMD Millipore 5100) as well as a 1:250 dilution of rabbit anti-Cre polyclonal antibody  
330 (Millipore Sigma 69050) followed by a 1:200 dilution of Alexa Fluor 594-conjugated donkey anti-rabbit  
331 secondary (Jackson Immuno 711-585-152).

332

333 For anti-EGFP staining (for Figure S1), HEK cells were plated as above, then infected the following day  
334 with serial dilutions of RV $\Delta$ G-4EGFP (Wickersham et al., 2010), RV $\Delta$ GL-4EGFP (Chatterjee et al., 2018),  
335 or RV $\Delta$ L-5EGFP, with immunostaining three days postinfection, using a 1:1000 dilution of chicken anti-GFP  
336 polyclonal antibody (Aves Labs, GFP-1020) and a 1:500 dilution of Alexa Fluor 594-conjugated donkey  
337 anti-chicken secondary antibody (Jackson Immuno 703-585-155).

338 Immunostained cells on coverslips were mounted on slides using Prolong Diamond Antifade  
339 mounting medium (Thermo P36970) and imaged on a Zeiss LSM 900 confocal microscope using a 20x  
340 objective.

341 For matched flow cytometric analysis of immunostained cells, cells were plated in 24-well plates  
342 without poly-L-lysine-coated coverslips but otherwise immunostained as described above, then analyzed  
343 on an LSR II flow cytometer (BD) using FACS Diva software (BD). Histograms displayed in Figure 1 were  
344 smoothed using the FACS Diva "Smooth histogram" setting.

### 345 346 **Viral growth analysis**

347 For determining growth curves, BHK-B19G3, BHK-B19L-G, and BHK-B19L cells (see above) were plated  
348 in 10 cm plates coated in poly-L-lysine in normal medium (10% fetal bovine serum (VWR 16777-014) and  
349 antibiotic-antimycotic (Thermo 15240096) in DMEM (Thermo 11995073)) (Wickersham et al., 2010). The  
350 following day, cells were infected with RV $\Delta$ G-4Cre(B19G), RV $\Delta$ GL-4Cre(B19G), or RV $\Delta$ L-5Cre(B19G) at  
351 an MOI of either 1 (for single-step growth curves) or 0.01 (for multi-step growth curves), with viruses diluted  
352 in normal medium at a total volume of 2 ml per plate, with each condition in triplicate. Following a one-hour  
353 incubation, the virus-containing medium was aspirated, plates were washed twice in DPBS (Thermo  
354 14190144), and 12 ml fresh medium was added to each plate before they were returned to the incubator.  
355 Every 24 hours for the following five days, 200  $\mu$ l of supernatant was collected from each plate; these  
356 supernatant samples were filter-sterilized using a 96-well 0.45 $\mu$ m PVDF filter plate (Millipore MSHVN4510),  
357 then frozen at -80°C before all samples were thawed and titered on HEK 293T-FLEX-BC cells as described  
358 above.

### 359 360 **Mouse strains**

361 The Cre-dependent tdTomato reporter line Ai14 (Madisen et al., 2010) was purchased from Jackson  
362 Laboratory (catalog # 007914). The Flp-dependent tdTomato reporter line Ai65F was obtained by crossing  
363 the Cre- and Flp-dependent tdTomato double-reporter line Ai65D (Madisen et al., 2015) (Jackson  
364 Laboratory 021875) to the Cre deleter line Meox2-Cre (Tallquist and Soriano, 2000) (Jackson Laboratory  
365 003755), then breeding out the Meox2-Cre allele. An equivalent Ai65F line, made using a different Cre  
366 deleter line, was described in Daigle et al. '18 (Daigle et al., 2018) and is now available from Jackson  
367 Laboratory (catalog # 032864). The tTA-dependent tdTomato reporter line Ai63 (Daigle et al., 2018) was a  
368 generous gift from Hongkui Zeng and Tanya Daigle. Mice used for the functional two-photon imaging  
369 experiments were crosses of the Cre- and tTA-dependent GCaMP6s line Ai94D (Jackson Laboratory  
370 024104) with the Cre-dependent tTA line ROSA:LNL:tTA (Wang et al., 2008) (Jackson Laboratory 011008).  
371 All mice were maintained in a C57BL/6J (Jackson Laboratory 000664) background.

372 For experiments, adult mice of both sexes were used, of the following mouse strains. For retrograde  
373 targeting using Cre-expressing viruses (Figure 2) and structural two-photon imaging (Figure 3): Ai14  
374 heterozygotes. For retrograde targeting using Flpo-expressing viruses (Figure 2): Ai65F heterozygotes. For  
375 retrograde targeting using RV $\Delta$ L-tTA (Figure S3): Ai63 heterozygotes. For functional two-photon imaging  
376 (Figures 4, S4, and S5): Ai94D x ROSA:LNL:tTA double homozygotes.

### 377 378 **Stereotaxic injections**

379 200 nl of rabies virus was injected into either somatosensory thalamus (VPM/Po, for figure 2) or primary  
380 visual cortex (for two-photon experiments) of anesthetized adult mice using a stereotaxic instrument  
381 (Stoelting Co., 51925) and a custom injection apparatus consisting of a hydraulic manipulator (Narishige,  
382 MO-10) with headstage coupled via custom adaptors to a wire plunger advanced through pulled glass  
383 capillaries (Drummond, Wiretrol II) back-filled with mineral oil and front-filled with viral vector solution (Lavin  
384 et al., 2019). We have described this injection system in detail previously. Injection coordinates for VPM/Po  
385 were: anteroposterior (AP) = -1.82 mm with respect to (w.r.t.) bregma, lateromedial (LM) = +1.54 mm w.r.t  
386 bregma, dorsoventral (DV) = -3.15 mm w.r.t the brain surface; injection coordinates for V1 cortex were: AP  
387 = -2.70 mm w.r.t. bregma, LM = 2.50 mm w.r.t. bregma, DV = -0.26 mm w.r.t the brain surface.

388

389 For mice to be used for two-photon imaging, a 3 mm craniotomy was opened over primary visual  
390 cortex (V1). Glass windows composed of a 3mm-diameter glass coverslip (Warner Instruments CS-3R)  
391 glued (Optical Adhesive 61, Norland Products) to a 5mm-diameter glass coverslip (Warner Instruments  
392 CS-5R) were affixed over the craniotomy with Metabond (Parkell) after virus injection.

393 For the  $\Delta$ GL vs.  $\Delta$ L experiments (Figure 2), the four viruses were produced in parallel for direct  
394 comparison, and RV $\Delta$ L-Cre (6.16E+10 i.u./ml) or RV $\Delta$ GL-Cre (3.01E+09 i.u./ml) was injected into Ai14  
395 (het) mice, and RV $\Delta$ L-Flpo (1.61E+09 i.u./ml) or RV $\Delta$ GL-4Flpo (1.12E+08 i.u./ml) was injected into Ai65F  
396 (het) mice. For the 4-month and 6-month experiments for Figure 2, RV $\Delta$ L-Cre (1.66E+10 i.u./ml) was  
397 injected into Ai14 (het) mice. For Figure S3, RV $\Delta$ L-tTA (3.63E+10 iu/ml) was injected into Ai63 (het) mice.

398 For two-photon structural experiments (Figure 3), RV $\Delta$ GL-Cre (1.19E+10 iu/ml) or RV $\Delta$ L-Cre  
399 (1.66E+10 iu/ml diluted to 1.19E+10 iu/ml for matching to RV $\Delta$ GL-Cre) was injected into Ai14 (het) mice.  
400 For two-photon functional experiments in Figure 4, RV $\Delta$ L-Cre (2.61E+10 iu/ml) was injected into  
401 homo/homo Ai94D x ROSA:LNL:tTA mice.

402

### 403 **Perfusions, histology, and confocal imaging**

404 1 week to 6 months (see main text) after injection of rabies virus, anesthetized mice were transcardially  
405 perfused with 4% paraformaldehyde. Brains were postfixed overnight in 4% paraformaldehyde in PBS on a  
406 shaker at 4°C and cut into 50  $\mu$ m coronal sections on a vibrating microtome (Leica, VT-1000S). Sections  
407 were collected sequentially into 6 tubes containing cryoprotectant, so that each tube contained every sixth  
408 section, then frozen at -20°C. Sections to be imaged were washed to remove cryoprotectant, then mounted  
409 with Prolong Diamond Antifade mounting medium (Thermo Fisher P36970) and imaged on a confocal  
410 microscope (Zeiss, LSM 900). To ensure that the confocal images included in the figures are  
411 representative of each group, the images were taken after the counts were conducted, and the mouse with  
412 the next higher number of labeled neurons than the average number for its group was selected for confocal  
413 imaging.

414

### 415 **Quantification of retrograde targeting**

416 Coronal sections between 0.43mm anterior and 4.07mm posterior to bregma were imaged with an  
417 epifluorescence microscope for cell counting (Zeiss, Imager.Z2). Due to the high density of retrogradely  
418 labeled tdTomato neurons in the cortex at the injection site (VPM/Po), cells were counted using the  
419 Analyze Particle function in ImageJ (size in micron<sup>2</sup>: 20-400; circularity: 0.20-1.00). Only one of the six  
420 series of sections (i.e., every sixth section: see above) was counted for each mouse. P-values for all  
421 comparisons were obtained using single-factor ANOVAs.

422

### 423 **Structural two-photon imaging and image analysis**

424 Beginning seven days after injection of each rabies virus and recurring at the subsequent indicated  
425 timepoints (see main text) up to a maximum of 16 weeks following rabies virus injection, fields of view  
426 (FOVs) were imaged on a Prairie/Bruker Ultima IV In Vivo two-photon microscope driven by a Spectra  
427 Physics Mai-Tai Deep See laser with a mode locked Ti:sapphire laser emitting at a wavelength of 1020 nm  
428 for excitation of tdTomato. In order to distinguish individual labeled neurons, FOVs were chosen some  
429 distance away from the area of brightest tdTomato labeling. Two well-separated areas were chosen in  
430 each mouse. For each imaging session, mice were reanesthetized and mounted via their headplates to a  
431 custom frame, with ointment applied to protect their eyes and with a handwarmer maintaining body  
432 temperature. Imaging parameters were as follows: image size 512 X 512 pixels (282.6  $\mu$ m x 282.6  $\mu$ m),  
433 0.782 Hz frame rate, dwell time 4.0  $\mu$ s, 2x optical zoom, Z-stack step size 1  $\mu$ m. Image acquisition was  
434 controlled with Prairie View 5.4 software. Laser power exiting the 20x water-immersion objective (Zeiss, W  
435 plan-apochromat, NA 1.0) varied between 20 and 65 mW depending on focal plane depth (Pockels cell  
436 value was automatically increased from 450 at the top section of each stack to 750 at the bottom section).  
437 For the example images of labeled cells, maximum intensity projections (stacks of 100-200  $\mu$ m) were made  
438 with ImageJ software. Cell counting was automated using the "Analyze Particles" function in ImageJ. Plots  
439 of cell counts were made with Prism 9 (GraphPad Software, San Diego, California).

440

### 441 **Functional two-photon imaging and image analysis**

442 For functional two-photon imaging of RV $\Delta$ L-Cre-labeled cells, FOVs were slightly offset from the regions of  
443 brightest GCaMP6s label in left-hemisphere V1 in order to allow separate identification of individual cells.  
444 This imaging was performed using the same microscope (5.356-Hz frame rate, 1024X 128 pixels, 565.1



445  $\mu\text{m} \times 565.1 \mu\text{m}$ , dwell time 0.8  $\mu\text{s}$ , 1x optical zoom, scan angle 45 degree) with the same objective and  
446 laser (at 920 nm) as for the structural imaging experiments. Laser power at the objective ranged from 10 to  
447 65 mW. Calcium imaging data were acquired in supragranular layers (100 to 200  $\mu\text{m}$  deep). Surface  
448 vasculature provided coarse fiducial markers for finding the same FOVs in different imaging sessions.  
449 For these experiments, mice were awake and head-fixed. No behavioral training or reward was given.  
450 Visual stimuli were generated in Matlab (R2015R version) with custom software based on Psychtoolbox  
451 (<http://psychtoolbox.org>) and shown on the same LCD screen as in the widefield mapping experiments.  
452 Each condition consisted of 2 s of a full-field sine wave grating drifting in one direction, presented at 80%  
453 contrast with spatial frequency of 0.04 cycles/ degree, followed by 2 s of uniform mean luminance (gray).  
454 All permutations of 12 directions (30° steps) and 5 temporal frequencies (1, 2, 4, 8 and 15 Hz) were shown,  
455 in randomized order. The complete set was repeated 10 times, for a total stimulation period of 40 min per  
456 FOV per session. Cells were then manually segmented, and single-cell fluorescence traces were extracted  
457 by averaging the fluorescence of all pixels masking the soma, using ImageJ (version 2-0-0-rc-69) software.  
458 The mean  $\Delta F/F$  over the full 2 s of each stimulus condition was used to calculate orientation tuning curves,  
459 with background fluorescence (F) in  $\Delta F/F$  taken as the value of the trace immediately preceding a  
460 condition, averaged over all conditions. The raw calcium traces from cells within individual FOVs (not  
461 across FOVs, given different imaging conditions across animals and time points) were sorted by mean  
462 fluorescence. Randomly colored ROI view images were created by suite2p (<https://www.suite2p.org>). For  
463 'tuned' cells in Figure 4 panels F and G, the counts are based on all imaged neurons' individual tuning  
464 curves, plotted in MATLAB; any cell showing response to a preferred orientation (including narrowly tuned  
465 neurons and broadly tuned neurons) at any temporal frequency (1Hz, 2Hz, 4Hz, 8Hz, or 15Hz) was  
466 counted manually as a tuned cell.

## 467 **RESOURCE AVAILABILITY**

468  
469  
470 All cell counts and statistical analyses are provided in Supplemental Information. The novel plasmids  
471 described in this paper have been deposited with Addgene with the accession numbers given in Methods.

## 472 **SUPPLEMENTAL INFORMATION**

473  
474  
475 Supplemental information can be found online.  
476 A preprint version of this paper is available on bioRxiv.

## 477 **ACKNOWLEDGMENTS**

478  
479  
480 We thank Tanya Daigle and Hongkui Zeng for sharing the Ai63 mouse line, Jacque Ip, Chloe Delepine, and  
481 Mriganka Sur for sharing mice, Chang Liu for assistance with optimizing MATLAB code for analysis of the  
482 functional imaging data, and Sara Beach for helpful suggestions on the manuscript. Research reported in  
483 this publication was supported by BRAIN Initiative awards RF1MH120017, U01MH106018, U01MH114829,  
484 and U19MH114830 from the National Institute of Mental Health.

## 485 **AUTHOR CONTRIBUTIONS**

486  
487  
488 L.J., N.E.L., M.M., Y.H., and M.Z. cloned constructs; H.A.S. produced viruses with assistance from L.J. and  
489 M.Z.; H.A.S. conducted cell culture assays and immunocytochemistry; L.J., N.E.L., and T.K.L. performed  
490 surgeries; L.J. and M.Z. performed histology and confocal imaging; L.J. performed two-photon imaging; L.J.,  
491 M.Z., T.K.L., and N.E.L. managed mouse breeding; I.W. planned and supervised all work; I.W. and L.J. wrote  
492 the manuscript with input from the other authors.

## 493 **DECLARATION OF INTERESTS**

494  
495  
496 I.R.W. is a consultant for Monosynaptix, LLC, advising on design of neuroscientific experiments.

## 497 **REFERENCES**

498  
499

- 500 Albertini, A.A., Ruigrok, R.W., and Blondel, D. (2011). Rabies virus transcription and replication. *Advances*  
501 *in virus research* 79, 1-22.
- 502 Alitto, H.J., and Usrey, W.M. (2003). Corticothalamic feedback and sensory processing. *Curr Opin Neurobiol*  
503 13, 440-445.
- 504 Bragg, E.M., Fairless, E.A., Liu, S., and Briggs, F. (2017). Morphology of visual sector thalamic reticular  
505 neurons in the macaque monkey suggests retinotopically specialized, parallel stream-mixed input to the  
506 lateral geniculate nucleus. *J Comp Neurol* 525, 1273-1290.
- 507 Briggs, F., Kiley, C.W., Callaway, E.M., and Usrey, W.M. (2016). Morphological Substrates for Parallel  
508 Streams of Corticogeniculate Feedback Originating in Both V1 and V2 of the Macaque Monkey. *Neuron* 90,  
509 388-399.
- 510 Chatterjee, S., Sullivan, H.A., MacLennan, B.J., Xu, R., Hou, Y., Lavin, T.K., Lea, N.E., Michalski, J.E.,  
511 Babcock, K.R., Dietrich, S., *et al.* (2018). Nontoxic, double-deletion-mutant rabies viral vectors for retrograde  
512 targeting of projection neurons. *Nat Neurosci* 21, 638-646.
- 513 Chen, T.W., Wardill, T.J., Sun, Y., Pulver, S.R., Renninger, S.L., Baohan, A., Schreiter, E.R., Kerr, R.A.,  
514 Orger, M.B., Jayaraman, V., *et al.* (2013). Ultrasensitive fluorescent proteins for imaging neuronal activity.  
515 *Nature* 499, 295-300.
- 516 Connolly, J.D., Hashemi-Nezhad, M., and Lyon, D.C. (2012). Parallel feedback pathways in visual cortex of  
517 cats revealed through a modified rabies virus. *J Comp Neurol* 520, 988-1004.
- 518 Cruz, A.M., Kim, T.H., and Smith, R.J. (2021). Monosynaptic Retrograde Tracing From Prelimbic Neuron  
519 Subpopulations Projecting to Either Nucleus Accumbens Core or Rostromedial Tegmental Nucleus. *Front*  
520 *Neural Circuits* 15, 639733.
- 521 Daigle, T.L., Madisen, L., Hage, T.A., Valley, M.T., Knoblich, U., Larsen, R.S., Takeno, M.M., Huang, L., Gu,  
522 H., Larsen, R., *et al.* (2018). A Suite of Transgenic Driver and Reporter Mouse Lines with Enhanced Brain-  
523 Cell-Type Targeting and Functionality. *Cell* 174, 465-480 e422.
- 524 Dohaku, R., Yamaguchi, M., Yamamoto, N., Shimizu, T., Osakada, F., and Hibi, M. (2019). Tracing of  
525 Afferent Connections in the Zebrafish Cerebellum Using Recombinant Rabies Virus. *Front Neural Circuits*  
526 13, 30.
- 527 Faulkner, R.L., Wall, N.R., Callaway, E.M., and Cline, H.T. (2021). Application of Recombinant Rabies Virus  
528 to *Xenopus* Tadpole Brain. *eNeuro*.
- 529 Finke, S., and Conzelmann, K.K. (2005). Replication strategies of rabies virus. *Virus Res*.
- 530 Foster, N.N., Barry, J., Korobkova, L., Garcia, L., Gao, L., Becerra, M., Sherafat, Y., Peng, B., Li, X., Choi,  
531 J.H., *et al.* (2021). The mouse cortico-basal ganglia-thalamic network. *Nature* 598, 188-194.
- 532 Gallardo, H.F., Tan, C., and Sadelain, M. (1997). The internal ribosomal entry site of the  
533 encephalomyocarditis virus enables reliable coexpression of two transgenes in human primary T  
534 lymphocytes. *Gene Ther* 4, 1115-1119.
- 535 Gomme, E.A., Faul, E.J., Flomenberg, P., McGettigan, J.P., and Schnell, M.J. (2010). Characterization of a  
536 single-cycle rabies virus-based vaccine vector. *Journal of virology* 84, 2820-2831.
- 537 Hasse, J.M., Bragg, E.M., Murphy, A.J., and Briggs, F. (2019). Morphological heterogeneity among  
538 corticogeniculate neurons in ferrets: quantification and comparison with a previous report in macaque  
539 monkeys. *J Comp Neurol* 527, 546-557.
- 540 Hidaka, Y., Lim, C.K., Takayama-Ito, M., Park, C.H., Kimitsuki, K., Shiwa, N., Inoue, K.I., and Itou, T. (2018).  
541 Segmentation of the rabies virus genome. *Virus Res* 252, 68-75.
- 542 Horwitz, J.A., Jenni, S., Harrison, S.C., and Whelan, S.P.J. (2020). Structure of a rabies virus polymerase  
543 complex from electron cryo-microscopy. *Proc Natl Acad Sci U S A* 117, 2099-2107.
- 544 Jin, L., Matsuyama, M., Sullivan, H.A., Zhu, M., Lavin, T.K., Hou, Y., Lea, N.E., Pruner, M.T., Fernández,  
545 M.L.D., and Wickersham, I.R. (2021a). Rabies virus with a destabilization domain added to its nucleoprotein  
546 spreads between neurons only if the domain is removed. *bioRxiv*, 550640.
- 547 Jin, L., Sullivan, H.A., Zhu, M., Lavin, T.K., Matsuyama, M., Lea, N.E., Xu, R., Hou, Y., Rutigliani, L., Pruner,  
548 M., *et al.* (2021b). Long-term labeling and imaging of synaptically-connected neuronal networks *in*  
549 *vivo* using nontoxic, double-deletion-mutant rabies viruses. *bioRxiv*, 2021.2012.2004.471186.
- 550 Koresawa, Y., Miyagawa, S., Ikawa, M., Matsunami, K., Yamada, M., Shirakura, R., and Okabe, M. (2000).  
551 Synthesis of a new Cre recombinase gene based on optimal codon usage for mammalian systems. *J*  
552 *Biochem* 127, 367-372.
- 553 Lavin, T.K., Jin, L., and Wickersham, I.R. (2019). Monosynaptic tracing: a step-by-step protocol. *J Chem*  
554 *Neuroanat*, 101661.

- 555 Liu, K., Kim, J., Kim, D.W., Zhang, Y.S., Bao, H., Denaxa, M., Lim, S.A., Kim, E., Liu, C., Wickersham, I.R.,  
556 *et al.* (2017). Lhx6-positive GABA-releasing neurons of the zona incerta promote sleep. *Nature* 548, 582-  
557 587.
- 558 Liu, Y.J., Ehrenguber, M.U., Negwer, M., Shao, H.J., Cetin, A.H., and Lyon, D.C. (2013). Tracing inputs to  
559 inhibitory or excitatory neurons of mouse and cat visual cortex with a targeted rabies virus. *Curr Biol* 23,  
560 1746-1755.
- 561 Lyon, D.C., Nassi, J.J., and Callaway, E.M. (2010). A disynaptic relay from superior colliculus to dorsal  
562 stream visual cortex in macaque monkey. *Neuron* 65, 270-279.
- 563 Madisen, L., Garner, A.R., Shimaoka, D., Chuong, A.S., Klapoetke, N.C., Li, L., van der Bourg, A., Niino, Y.,  
564 Egolf, L., Monetti, C., *et al.* (2015). Transgenic mice for intersectional targeting of neural sensors and  
565 effectors with high specificity and performance. *Neuron* 85, 942-958.
- 566 Madisen, L., Zwingman, T.A., Sunkin, S.M., Oh, S.W., Zariwala, H.A., Gu, H., Ng, L.L., Palmiter, R.D.,  
567 Hawrylycz, M.J., Jones, A.R., *et al.* (2010). A robust and high-throughput Cre reporting and characterization  
568 system for the whole mouse brain. *Nature neuroscience* 13, 133-140.
- 569 Miyamichi, K., Amat, F., Moussavi, F., Wang, C., Wickersham, I., Wall, N.R., Taniguchi, H., Tasic, B., Huang,  
570 Z.J., He, Z., *et al.* (2011). Cortical representations of olfactory input by trans-synaptic tracing. *Nature* 472,  
571 191-196.
- 572 Morin, B., Kranzusch, P.J., Rahmeh, A.A., and Whelan, S.P. (2013). The polymerase of negative-stranded  
573 RNA viruses. *Current opinion in virology* 3, 103-110.
- 574 Nakagawa, K., Kobayashi, Y., Ito, N., Suzuki, Y., Okada, K., Makino, M., Goto, H., Takahashi, T., and  
575 Sugiyama, M. (2017). Molecular Function Analysis of Rabies Virus RNA Polymerase L Protein by Using an  
576 L Gene-Deficient Virus. *J Virol* 91.
- 577 Nassi, J.J., and Callaway, E.M. (2006). Multiple circuits relaying primate parallel visual pathways to the  
578 middle temporal area. *J Neurosci* 26, 12789-12798.
- 579 Nassi, J.J., and Callaway, E.M. (2007). Specialized circuits from primary visual cortex to V2 and area MT.  
580 *Neuron* 55, 799-808.
- 581 Nassi, J.J., Lyon, D.C., and Callaway, E.M. (2006). The parvocellular LGN provides a robust disynaptic input  
582 to the visual motion area MT. *Neuron* 50, 319-327.
- 583 Ogino, T., and Green, T.J. (2019). Transcriptional Control and mRNA Capping by the GDP  
584 Polyribonucleotidyltransferase Domain of the Rabies Virus Large Protein. *Viruses* 11.
- 585 Raymond, C.S., and Soriano, P. (2007). High-efficiency FLP and PhiC31 site-specific recombination in  
586 mammalian cells. *PLoS One* 2, e162.
- 587 Reardon, T.R., Murray, A.J., Turi, G.F., Wirblich, C., Croce, K.R., Schnell, M.J., Jessell, T.M., and Losonczy,  
588 A. (2016). Rabies Virus CVS-N2c(DeltaG) Strain Enhances Retrograde Synaptic Transfer and Neuronal  
589 Viability. *Neuron* 89, 711-724.
- 590 Ren, W., Centeno, M.V., Wei, X., Wickersham, I., Martina, M., Apkarian, A.V., and Surmeier, D.J. (2021).  
591 Adaptive alterations in the mesoaccumbal network after peripheral nerve injury. *Pain* 162, 895-906.
- 592 Rockland, K.S. (2021). A Closer Look at Corticothalamic "Loops". *Front Neural Circuits* 15, 632668.
- 593 Rouiller, E.M., and Welker, E. (2000). A comparative analysis of the morphology of corticothalamic  
594 projections in mammals. *Brain Res Bull* 53, 727-741.
- 595 Roy, D.S., Zhang, Y., Aida, T., Choi, S., Chen, Q., Hou, Y., Lea, N.E., Skaggs, K.M., Quay, J.C., Liew, M.,  
596 *et al.* (2021). Anterior thalamic dysfunction underlies cognitive deficits in a subset of neuropsychiatric disease  
597 models. *Neuron* 109, 2590-2603 e2513.
- 598 Satou, C., Neve, R.L., Oyibo, H.K., Zmarz, P., Huang, K.-H., Bouldoires, E.A., Mori, T., Higashijima, S.-i.,  
599 Keller, G.B., and Friedrich, R.W. (2021). A viral toolbox for conditional and transneuronal gene expression in  
600 zebrafish. *bioRxiv*, 2021.2003.2025.436574.
- 601 Schwarz, L.A., Miyamichi, K., Gao, X.J., Beier, K.T., Weissbourd, B., DeLoach, K.E., Ren, J., Ibanes, S.,  
602 Malenka, R.C., Kremer, E.J., *et al.* (2015). Viral-genetic tracing of the input-output organization of a central  
603 noradrenaline circuit. *Nature*.
- 604 Shaner, N.C., Campbell, R.E., Steinbach, P.A., Giepmans, B.N., Palmer, A.E., and Tsien, R.Y. (2004).  
605 Improved monomeric red, orange and yellow fluorescent proteins derived from *Discosoma* sp. red fluorescent  
606 protein. *Nat Biotechnol* 22, 1567-1572.
- 607 Siu, C., Balsor, J., Merlin, S., Federer, F., and Angelucci, A. (2021). A direct interareal feedback-to-  
608 feedforward circuit in primate visual cortex. *Nat Commun* 12, 4911.
- 609 Smith, M.L., Asada, N., and Malenka, R.C. (2021). Anterior cingulate inputs to nucleus accumbens control  
610 the social transfer of pain and analgesia. *Science* 371, 153-159.

611 Stephenson-Jones, M., Yu, K., Ahrens, S., Tucciarone, J.M., van Huijstee, A.N., Mejia, L.A., Penzo, M.A.,  
612 Tai, L.H., Wilbrecht, L., and Li, B. (2016). A basal ganglia circuit for evaluating action outcomes. *Nature* 539,  
613 289-293.

614 Tallquist, M.D., and Soriano, P. (2000). Epiblast-restricted Cre expression in MORE mice: a tool to distinguish  
615 embryonic vs. extra-embryonic gene function. *Genesis* 26, 113-115.

616 Tasic, B., Yao, Z., Graybiel, L.T., Smith, K.A., Nguyen, T.N., Bertagnolli, D., Goldy, J., Garren, E., Economo,  
617 M.N., Viswanathan, S., *et al.* (2018). Shared and distinct transcriptomic cell types across neocortical areas.  
618 *Nature* 563, 72-78.

619 Te Velthuis, A.J.W., Grimes, J.M., and Fodor, E. (2021). Structural insights into RNA polymerases of  
620 negative-sense RNA viruses. *Nat Rev Microbiol* 19, 303-318.

621 Wall, N.R., Wickersham, I.R., Cetin, A., De La Parra, M., and Callaway, E.M. (2010). Monosynaptic circuit  
622 tracing in vivo through Cre-dependent targeting and complementation of modified rabies virus. *P Natl Acad*  
623 *Sci USA*.

624 Wang, G.P., and Bushman, F.D. (2006). A statistical method for comparing viral growth curves. *J Virol*  
625 *Methods* 135, 118-123.

626 Wang, L., Sharma, K., Deng, H.X., Siddique, T., Grisotti, G., Liu, E., and Roos, R.P. (2008). Restricted  
627 expression of mutant SOD1 in spinal motor neurons and interneurons induces motor neuron pathology.  
628 *Neurobiol Dis* 29, 400-408.

629 Wickersham, I.R., Finke, S., Conzelmann, K.K., and Callaway, E.M. (2007a). Retrograde neuronal tracing  
630 with a deletion-mutant rabies virus. *Nature Methods* 4, 47-49.

631 Wickersham, I.R., Lyon, D.C., Barnard, R.J., Mori, T., Finke, S., Conzelmann, K.K., Young, J.A., and  
632 Callaway, E.M. (2007b). Monosynaptic restriction of transsynaptic tracing from single, genetically targeted  
633 neurons. *Neuron* 53, 639-647.

634 Wickersham, I.R., and Sullivan, H.A. (2015). Rabies viral vectors for monosynaptic tracing and targeted  
635 transgene expression in neurons. *Cold Spring Harb Protoc* 2015, 375-385.

636 Wickersham, I.R., Sullivan, H.A., and Seung, H.S. (2010). Production of glycoprotein-deleted rabies viruses  
637 for monosynaptic tracing and high-level gene expression in neurons. *Nature protocols* 5, 595-606.

638 Wu, X., Morishita, W., Beier, K.T., Heifets, B.D., and Malenka, R.C. (2021). 5-HT modulation of a medial  
639 septal circuit tunes social memory stability. *Nature* 599, 96-101.

640 Yao, S., Wang, Q., Hirokawa, K.E., Ouellette, B., Ahmed, R., Bomben, J., Brouner, K., Casal, L., Caldejon,  
641 S., Cho, A., *et al.* (2021). A whole-brain monosynaptic input connectome to neuron classes in mouse visual  
642 cortex. *bioRxiv*, 2021.2009.2029.459010.

643 Yarch, J., Federer, F., and Angelucci, A. (2017). Local Circuits of V1 Layer 4B Neurons Projecting to V2  
644 Thick Stripes Define Distinct Cell Classes and Avoid Cytochrome Oxidase Blobs. *J Neurosci* 37, 422-436.

645 Zhu, P., Narita, Y., Bundschuh, S.T., Fajardo, O., Scharer, Y.P., Chattopadhyaya, B., Bouldoires, E.A.,  
646 Stepien, A.E., Deisseroth, K., Arber, S., *et al.* (2009). Optogenetic Dissection of Neuronal Circuits in Zebrafish  
647 using Viral Gene Transfer and the Tet System. *Front Neural Circuits* 3, 21.

648

649

650  
651

## FIGURES

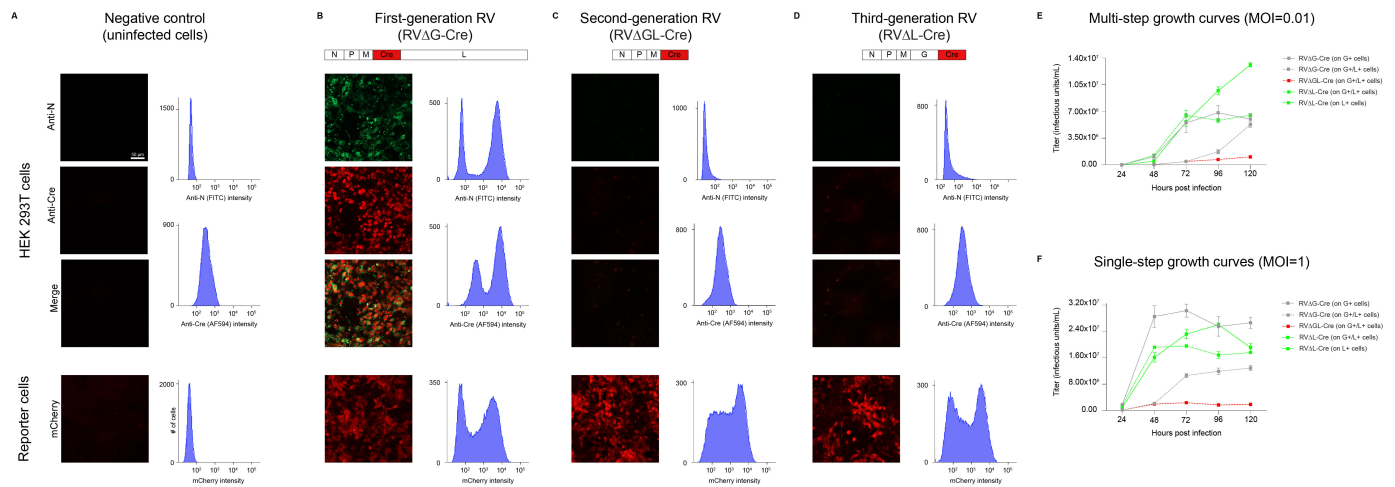

652  
653

**Figure 1. Rabies virus with just the polymerase gene deleted ( $\Delta L$ ) is phenotypically similar to double-deletion-mutant ( $\Delta GL$ ) virus but replicates to much higher titers within complementing cells.**

(A-D) Deletion of just the polymerase gene L reduces transgene expression to levels that are very low but still sufficient to support reporter allele recombination in Cre reporter cells.

(A) Negative controls (uninfected cells). Top: Uninfected HEK 293T cells stained for rabies virus nucleoprotein (green) and for Cre (red). Histograms to right of panels show flow cytometric quantification of baseline fluorescence of uninfected cells in these channels. Bottom: Uninfected reporter cells which express mCherry following Cre recombination. Little signal is seen in these negative controls.

(B) Cells infected with a first-generation ( $\Delta G$ ) vector expressing Cre. Both Cre and N are expressed at very high levels, and infected Cre reporter cells brightly express mCherry (note that dilutions at which roughly half of cells were infected were chosen for this figure).

(C) Consistent with our previous findings (Chatterjee et al., 2018), expression of both nucleoprotein and Cre from a second-generation ( $\Delta GL$ ) vector is drastically reduced with respect to the first-generation vector, with expression levels comparable to those seen in negative controls. Despite this, the low Cre levels are still high enough to activate mCherry expression in reporter cells.

(D) A third-generation ( $\Delta L$ ) vector expresses nucleoprotein and Cre at similarly very low levels, but again Cre expression is nonetheless high enough to successfully activate mCherry expression in reporter cells.

(E-F) Third-generation ( $\Delta L$ ) vectors grow to much high titers in cultured cells than second-generation ( $\Delta GL$ ) ones do.

(E) Viral titers in supernatants of complementing cells (expressing L, G, or both) infected with  $\Delta L$ ,  $\Delta GL$ , or  $\Delta G$  viruses at a multiplicity of infection (MOI) of 0.01 ("multi-step growth curves"), with supernatants collected every 24 hours for five days. Whereas a  $\Delta GL$  virus only achieves  $1.05E+06$  infectious units (i.u./ml) over the duration of the experiment, the  $\Delta L$  virus grows to 6.2-fold higher on the same cell line, and 12.5-fold higher on a line expressing L alone. The highest  $\Delta L$  titers obtained in this experiment were significantly higher than the highest obtained with a first-generation ( $\Delta G$ ) virus (single-factor ANOVA,  $p = 3.24E-03$ ,  $n = 3$  replicates per condition).

(F) Similarly, at a MOI of 1 ("single-step" growth curves), the  $\Delta GL$  virus titer peaks at  $2.37E+06$  i.u./ml, whereas the peak titer of the  $\Delta L$  virus is  $2.60E+07$  i.u./ml, 11.0-fold higher than that of the  $\Delta GL$  virus and not significantly different from that of the  $\Delta G$  virus (single-factor ANOVA,  $p = 0.105$ ,  $n = 3$  replicates per condition). Graphs in (E-F) show means  $\pm$  s.e.m.

683

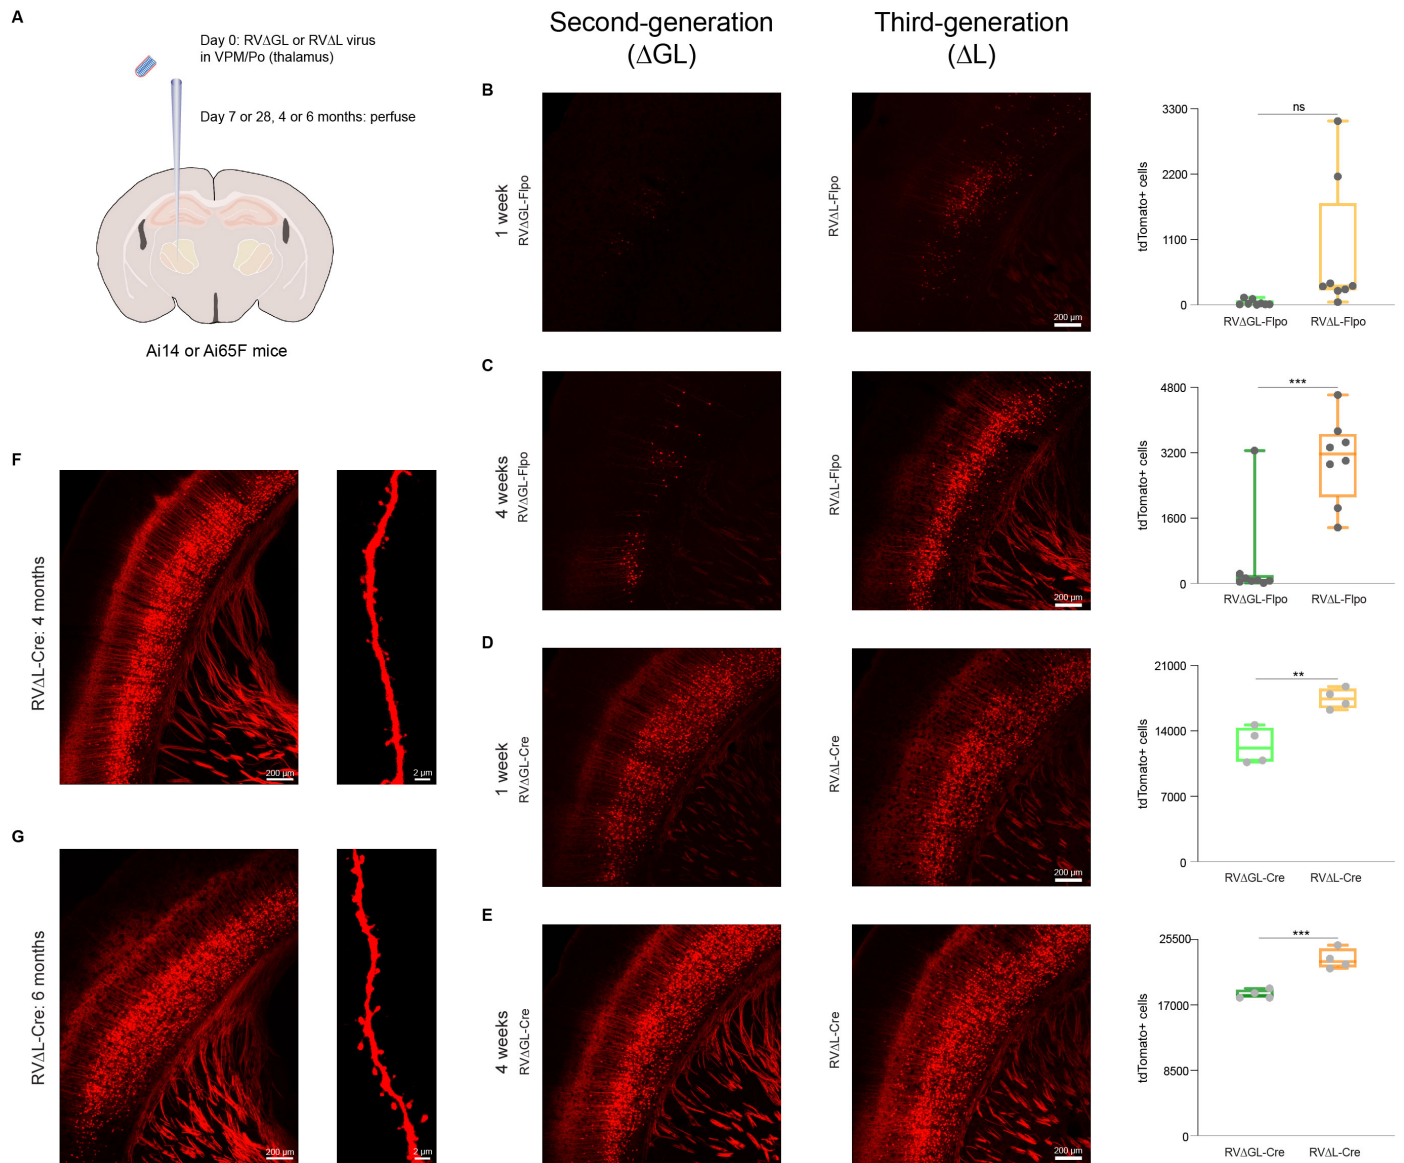

684  
685

686 **Figure 2. Third-generation ( $\Delta$ L) rabies viral vectors retrogradely label many more projection**  
687 **neurons *in vivo* than do second-generation ( $\Delta$ GL) ones and leave cells morphologically normal**  
688 **for at least six months.**

689 (A) Design of experiments retrogradely targeting corticothalamic cells in reporter mice. Either second-  
690 generation vector RV $\Delta$ GL-Fipo or RV $\Delta$ GL-Cre, or third-generation vector RV $\Delta$ L-Fipo or RV $\Delta$ L-Cre, was  
691 injected into somatosensory thalamus (VPM/Po) of either Ai65F (Fipo reporter) or Ai14 (Cre reporter). Mice  
692 were perfused 1 week (b, d), 4 weeks (c, e), 4 months (f), or 6 months later (g).

693 (B-E) Efficacy comparison of Fipo- and Cre-expressing  $\Delta$ GL and  $\Delta$ L vectors.

694 (B) Corticothalamic neurons in S1 of Ai65F mice labeled with RV $\Delta$ GL-Fipo (left) or RV $\Delta$ L-Fipo (center) at 1  
695 week postinjection. Scale bar: 200  $\mu$ m, applies to both images. Counts of labeled cortical neurons  
696 are shown at right (each data point is the total number in one series consisting of every sixth 50  $\mu$ m  
697 section from a given brain - see Methods). The  $\Delta$ L virus labeled 24 times as many cortical neurons  
698 than the  $\Delta$ GL virus did, although the difference in this case is not significant due to high variance  
699 (single-factor ANOVA,  $p = 0.0608$ ,  $n = 8$  mice per group).

700 (C) Corticothalamic neurons in S1 of Ai65F mice labeled with RV $\Delta$ GL-Fipo (left) or RV $\Delta$ L-Fipo (center) at 4  
701 weeks postinjection. Scale bar: 200  $\mu$ m, applies to both images. Counts of labeled cortical neurons  
702 are shown at right. The  $\Delta$ L virus labeled 6.25 times as many cortical neurons than the  $\Delta$ GL virus  
703 did, an extremely significant difference (single-factor ANOVA,  $p = 0.000321$ ,  $n = 8$  mice per group).

704 (D) Corticothalamic neurons in S1 of Ai14 mice labeled with RV $\Delta$ GL-Cre (left) or RV $\Delta$ L-Cre (center) at 1  
705 week postinjection. Scale bar: 200  $\mu$ m, applies to both images. Counts of labeled cortical neurons are

706 shown at right. The  $\Delta L$  virus labeled 1.4 times as many cortical neurons than the  $\Delta GL$  virus did, a highly  
707 significant difference (single-factor ANOVA,  $p = 0.00420$ ,  $n = 8$  mice per group).  
708 (E) Corticothalamic neurons in S1 of Ai14 mice labeled with RV $\Delta GL$ -Cre (left) or RV $\Delta L$ -Cre (center) at 4  
709 weeks postinjection. Scale bar: 200  $\mu m$ , applies to both images. Counts of labeled cortical neurons are  
710 shown at right. The  $\Delta L$  virus labeled 1.25 times as many cortical neurons than the  $\Delta GL$  virus did, an  
711 extremely significant difference (single-factor ANOVA,  $p = 0.000738$ ,  $n = 8$  mice each group).  
712 (F) Corticothalamic neurons in S1 of Ai14 mice labeled with RV $\Delta L$ -Cre at 4 months postinjection. Cells  
713 appear morphologically completely normal, with no blebbing or decomposition of processes. Scale bars:  
714 200  $\mu m$  (left image) and 2  $\mu m$  (right image).  
715 (G) Corticothalamic neurons in S1 of Ai14 mice labeled with RV $\Delta L$ -Cre at 6 months postinjection. Cells still  
716 appear morphologically completely normal. Scale bars: 200  $\mu m$  (left image) and 2  $\mu m$  (right image).

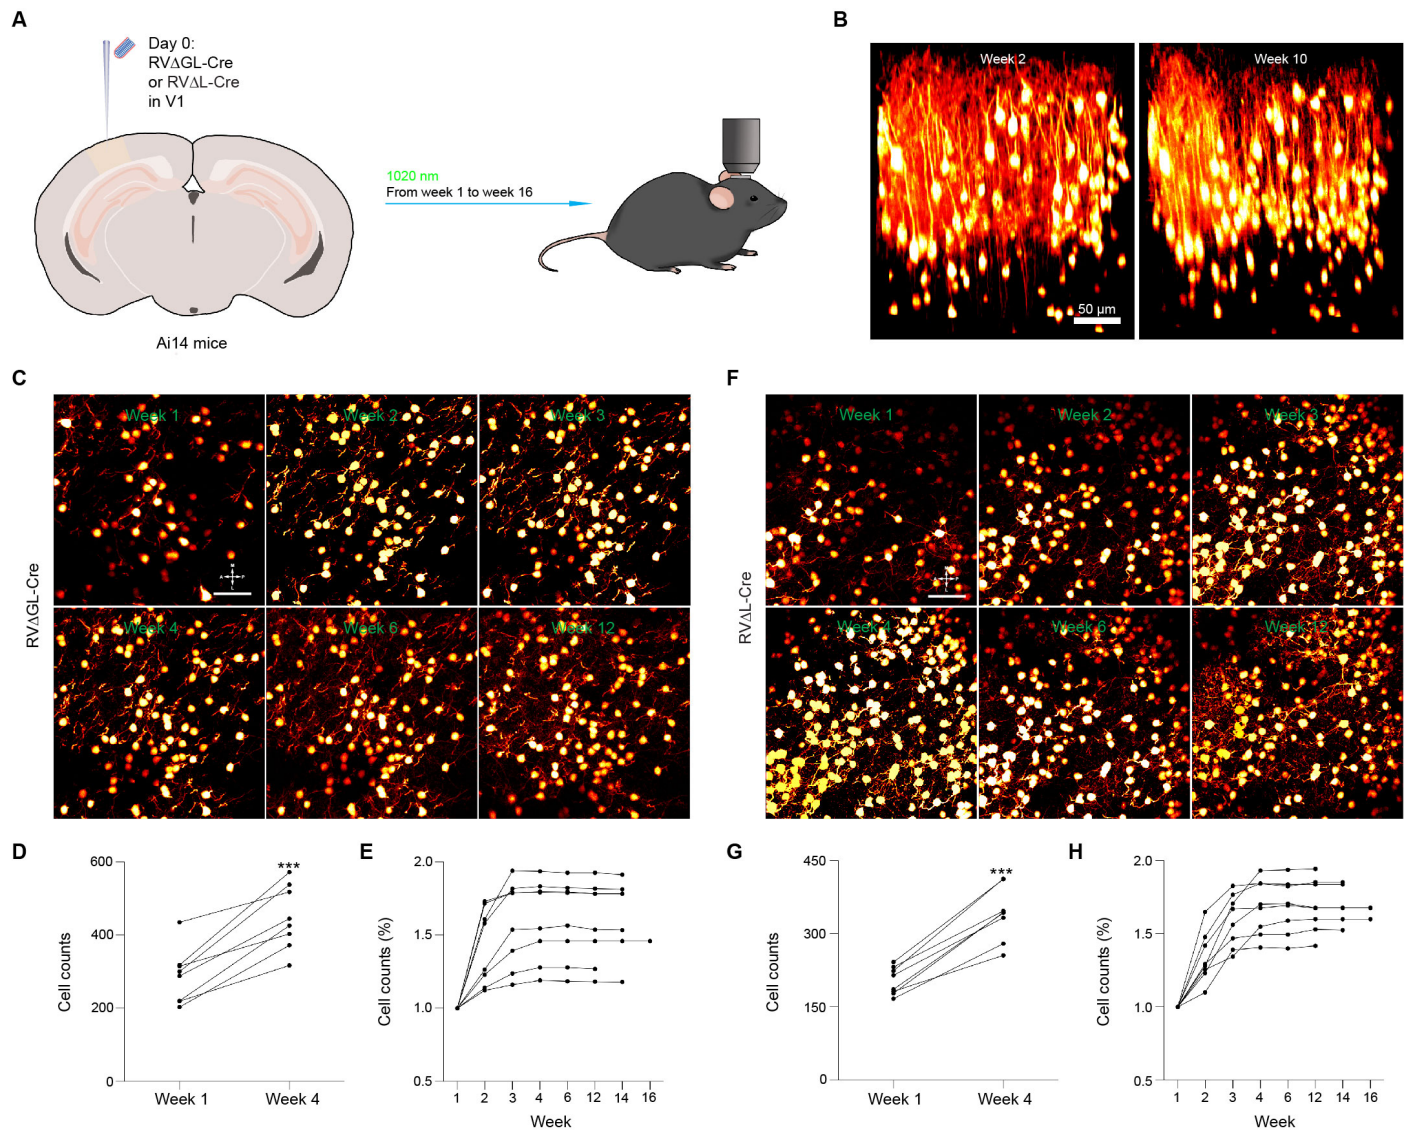

717  
718

719 **Figure 3. Neurons labeled by  $\Delta$ L rabies virus survive for at least 16 weeks.**

720 (A) Experimental design for longitudinal structural two-photon imaging *in vivo*. Second-generation ( $\Delta$ GL) or  
721 third-generation ( $\Delta$ L) virus expressing Cre was injected in primary visual cortex of reporter mice, then the  
722 injection sites were imaged repeatedly for the following 16 weeks.

723 (B) Example renderings of the same volume of cortex labeled by RV $\Delta$ L-Cre and imaged with a two-photon  
724 microscope at two different timepoints, 2 weeks (left) and 10 weeks (right). Every labeled neuron visible at  
725 2 weeks is still present at 10 weeks. Scale bar: 50  $\mu$ m. See also Video S1.

726 (C) & (F), Example two-photon images of single fields of view (FOV) of cortex labeled by either the second-  
727 generation vector RV $\Delta$ GL-Cre (C) or the third-generation vector RV $\Delta$ L-Cre (F), imaged at different  
728 timepoints, from 1 week (top left) to 12 weeks (bottom right). All labeled neurons visible at earlier  
729 timepoints are still present at later ones, for both viruses. Scale bars: 50  $\mu$ m, apply to all images.

730 (D) & (G), Absolute numbers of cells visibly labeled by RV $\Delta$ GL-Cre (D) or RV $\Delta$ L-Cre (G) for all structural  
731 FOVs in the study, at the 1-week and 4-week timepoints. Numbers of visibly labeled cells increased by  
732 56.27% for  $\Delta$ GL and by 67.77% for  $\Delta$ L, as we found previously for second-generation vectors (Chatterjee  
733 et al., 2018)), suggesting accumulation and persistent activity of recombinase on this timescale. These  
734 increases were both extremely significant (one-tailed paired t-tests,  $p = 0.000132$  ( $\Delta$ GL) and  $0.00001003$   
735 ( $\Delta$ L),  $n = 8$  FOVs each virus), but there was no significant difference between the increases seen for the  
736 two viruses (two-tailed unpaired t-test,  $p = 0.5187$ ,  $n = 8$  FOVs per group).

737 (E) & (H), Percentages of cells visibly labeled by RV $\Delta$ GL-Cre (E) and RV $\Delta$ L-Cre (H) over time, relative to  
738 the numbers visible at 1 week after rabies injection; each connected set of dots represents numbers seen  
739 in a given FOV at the different time points. For both viruses, the numbers of labeled neurons remain nearly



740 constant from the 4-week timepoint onward, as we found previously (Chatterjee et al., 2018) for  $\Delta$ GL virus.  
741 Imaging was discontinued for some mice at weeks 12 or 14 due to cloudiness of the optical windows.

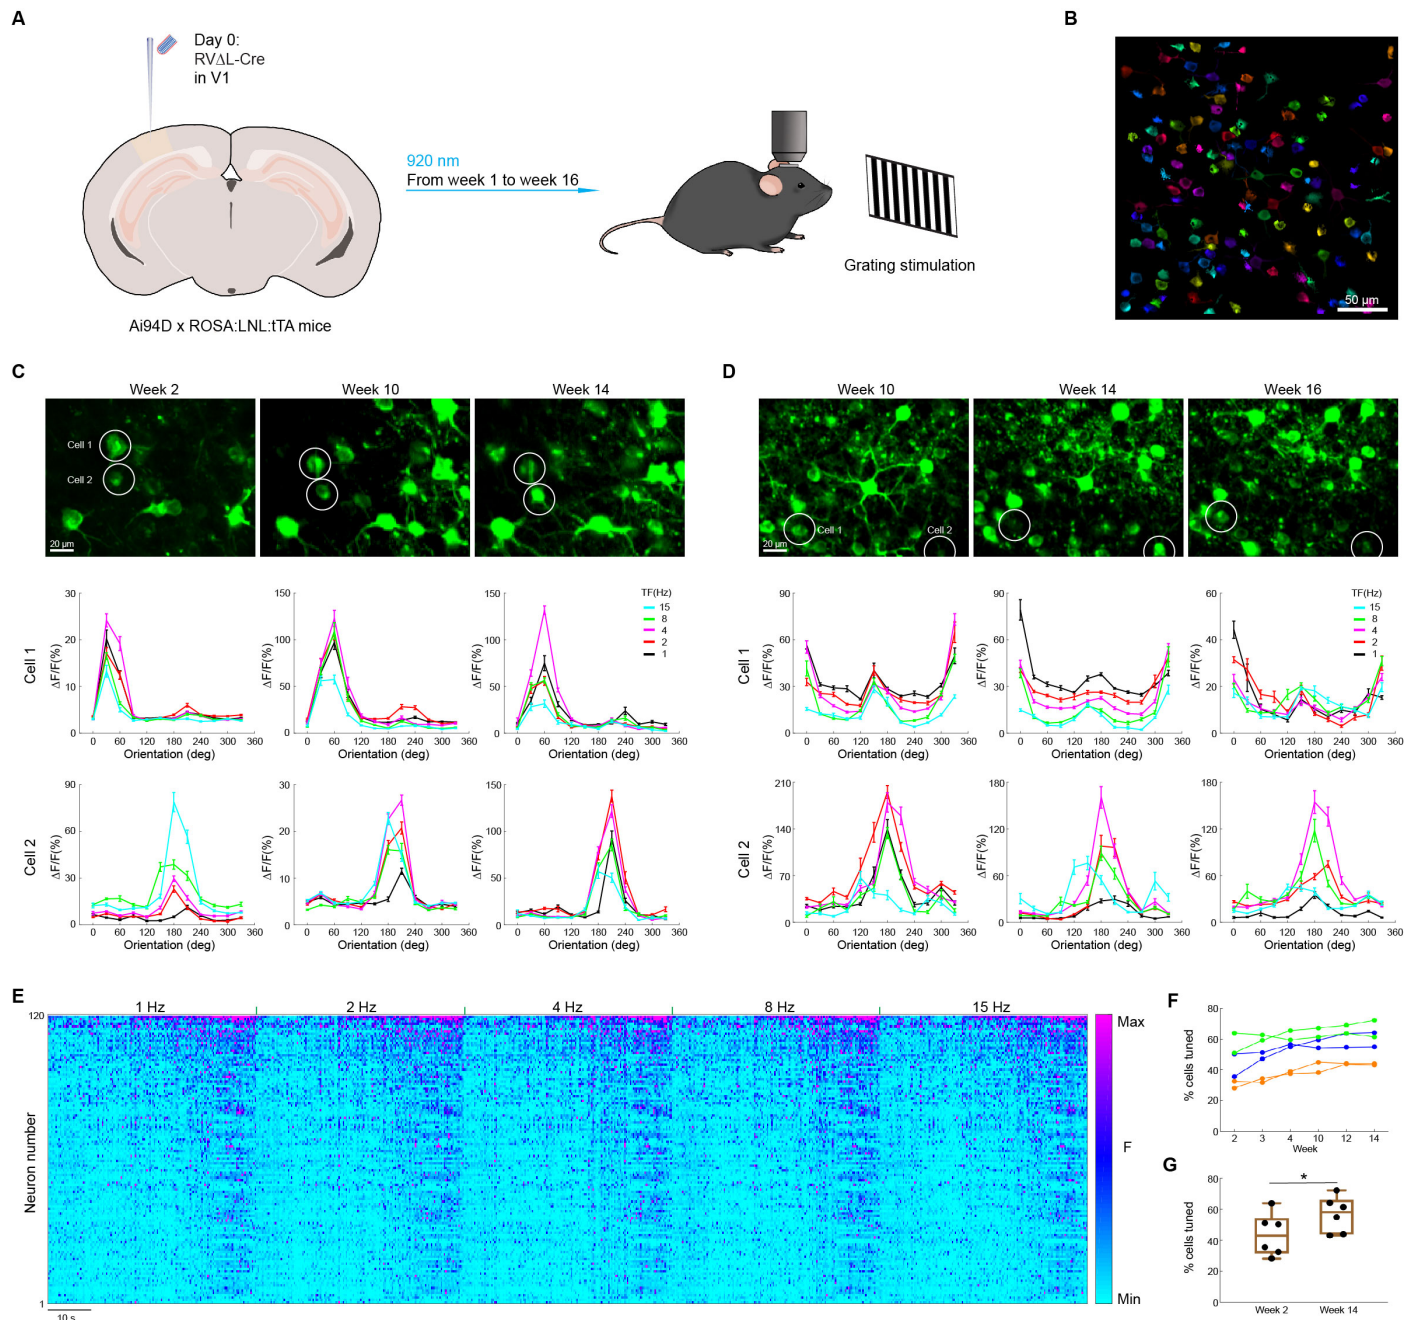

742  
743

**Figure 4.  $\Delta$ L rabies virus does not appear to perturb neurons' visual response properties for at least 16 weeks.**

746 (A) Experimental design for longitudinal functional two-photon imaging *in vivo*.  $\Delta$ L virus expressing Cre was  
747 injected in primary visual cortex of reporter mice expressing GCaMP6s (Chen et al., 2013) after Cre  
748 recombination, then the injection sites were imaged while the awake mice were presented with drifting  
749 grating stimuli of different orientations and temporal frequencies, repeatedly for 16 weeks following virus  
750 injection.

751 (B) Example FOV from a GCaMP6s imaging session 16 weeks after RV injection. Individual analyzed cells  
752 are randomly pseudocolored. This is the same FOV as shown in Video S2. Scale bar: 50  $\mu$ m.

753 (C-D) Long-term stability of orientation and temporal frequency tuning in RV $\Delta$ L-Cre-labeled neurons. The  
754 top rows show maximum intensity projections of the imaged GCaMP6s signal in two different FOVs at  
755 three different timepoints for each FOV. Scale bars: 20  $\mu$ m, apply to all images. Visual response tuning  
756 curves of the two circled cells in each FOV at the corresponding timepoint, obtained with drifting gratings  
757 presented at 12 directions of motion and 5 temporal frequencies (TF) (mean  $\Delta$ F/F  $\pm$  s.e.m., averaged over  
758 10 repeats), are shown under each image. More examples from the same FOV are shown in Figure S5.

759 (E) Single-cell fluorescence time courses for 120 cells at the 12-week timepoint, showing activity over all  
760 five temporal frequencies (mean  $\Delta F/F$ , averaged over 10 repeats). Cells are ranked in descending order of  
761 total activity. Scale bar: 10 s.  
762 (F) Percentages of labeled cells that were visually tuned (see Methods), from 6 different FOVs in 3 mice  
763 imaged over 14 weeks. Connected sets of dots in a given color indicate data from a single mouse (data  
764 from 2 FOVs are shown per mouse).  
765 (G) Comparison of the percentages of labeled cells that were visually tuned at 2 weeks and 14 weeks. The  
766 percentages increased moderately but significantly between the two timepoints, from 60% to 68% (paired  
767 two-sample t-test,  $p = 0.0178$ ,  $n = 6$ ).  
768  
769

770  
771

## SUPPLEMENTAL INFORMATION

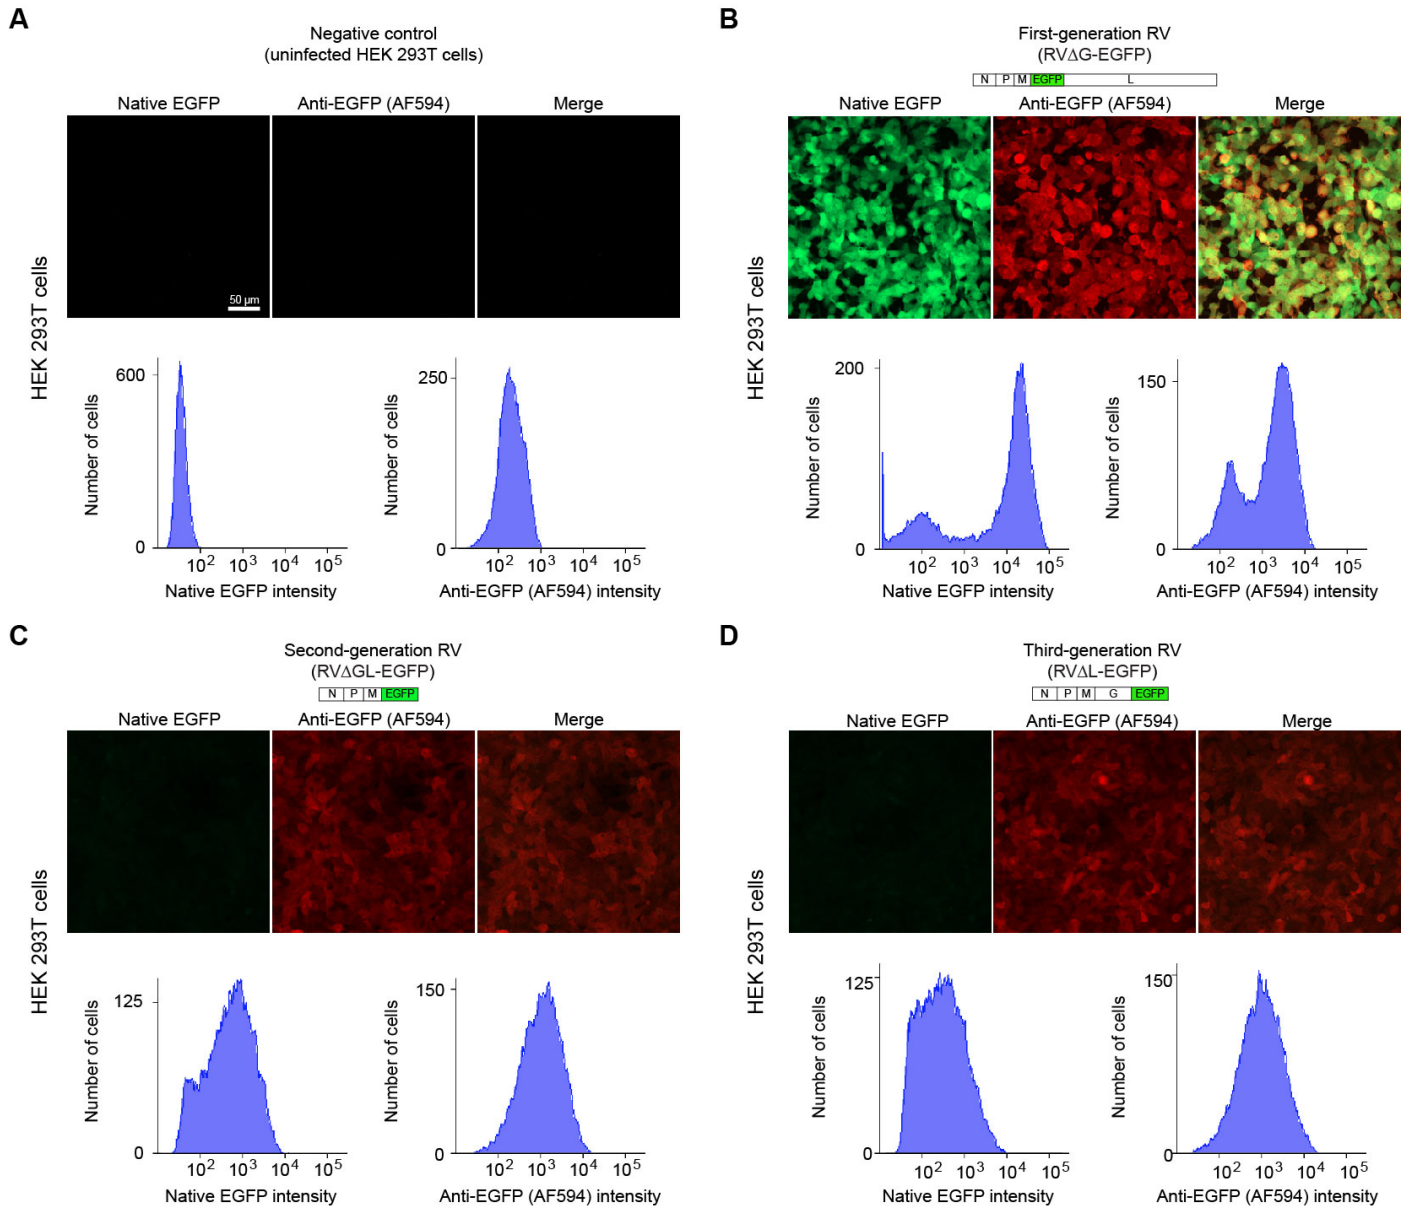

772  
773  
774  
775  
776  
777  
778  
779

**Figure S1.  $\Delta$ L and  $\Delta$ GL viruses express EGFP at similarly low levels, Related to Figure 1**

Confocal images and flow cytometric histograms showing native and immunostained EGFP signal in uninfected cells (A) and cells infected with first-generation ( $\Delta$ G) virus (B), second-generation ( $\Delta$ GL) virus (C), or third-generation virus (D) expressing EGFP. Scale bar: 50  $\mu$ m, applies to all images.

**A Multi-step growth curves (MOI=0.01)**

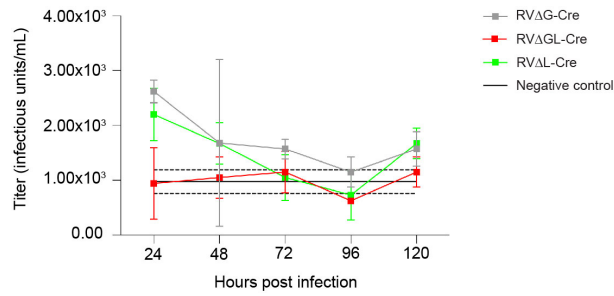

**B Single-step growth curves (MOI=1)**

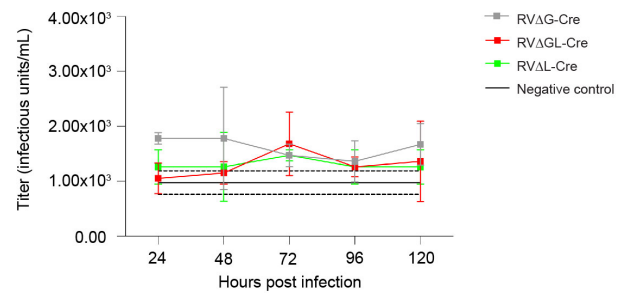

780  
781

**782 Figure S2.  $\Delta G$ ,  $\Delta GL$ , and  $\Delta L$  viruses do not propagate in non-complementing cells, Related to Figure**  
**783 1**

784 Viral titers in supernatants of BHK-21 cells not expressing any rabies viral genes, infected with  $\Delta L$ ,  $\Delta GL$ , or  
785  $\Delta G$  viruses at a multiplicity of infection (MOI) of 0.01 ("multi-step growth curves", panel A) or 1 ("single-  
786 step" growth curves, panel B), with supernatants collected every 24 hours for five days. Graphs show mean  
787  $\pm$  s.e.m. .Black lines show negative control "titers" calculated from uninfected reporter cells (mean  $\pm$  s.e.m.  
788 of 10 samples). Note that the titers in these graphs are 3-4 orders of magnitude lower than those obtained  
789 on complementing cells (Figure 1).  
790

791  
792  
793  
794

**File S1. Titers and statistics for growth dynamics experiments, Related to Figure 1**

*See following pages.*

| FACS data from Single-step growth curves (Infectious units/mL) | 24hr     | 48hr     | 72hr     | 96hr     | 120hr    |
|----------------------------------------------------------------|----------|----------|----------|----------|----------|
| (1) RVΔGL-Cre (on B19L-G_01 cells)                             | 1.89E+05 | 1.99E+06 | 2.39E+06 | 1.76E+06 | 1.94E+06 |
| (2) RVΔGL-Cre (on B19L-G_01 cells)                             | 1.48E+05 | 1.97E+06 | 2.46E+06 | 1.77E+06 | 1.92E+06 |
| (3) RVΔGL-Cre (on B19L-G_01 cells)                             | 1.55E+05 | 1.89E+06 | 2.25E+06 | 1.55E+06 | 1.73E+06 |
| (7) RVΔL-Cre (on B19L_02 cells)                                | 8.60E+05 | 1.84E+07 | 2.60E+07 | 2.71E+07 | 2.10E+07 |
| (8) RVΔL-Cre (on B19L_02 cells)                                | 7.05E+05 | 1.35E+07 | 2.11E+07 | 2.54E+07 | 1.92E+07 |
| (9) RVΔL-Cre (on B19L_02 cells)                                | 1.17E+06 | 1.65E+07 | 2.25E+07 | 2.56E+07 | 1.70E+07 |
| (13) RVΔL-Cre (on B19L-G_01 cells)                             | 1.31E+06 | 1.92E+07 | 2.02E+07 | 1.87E+07 | 1.79E+07 |
| (14) RVΔL-Cre (on B19L-G_01 cells)                             | 1.88E+06 | 1.96E+07 | 1.92E+07 | 1.67E+07 | 1.79E+07 |
| (15) RVΔL-Cre (on B19L-G_01 cells)                             | 1.61E+06 | 1.89E+07 | 1.94E+07 | 1.51E+07 | 1.70E+07 |
| (19) RVΔG-Cre (on B19G3-2 cells)                               | 2.13E+06 | 3.12E+07 | 3.22E+07 | 3.02E+07 | 2.71E+07 |
| (20) RVΔG-Cre (on B19G3-2 cells)                               | 1.89E+06 | 3.22E+07 | 3.24E+07 | 2.63E+07 | 2.92E+07 |
| (21) RVΔG-Cre (on B19G3-2 cells)                               | 1.39E+06 | 2.19E+07 | 2.64E+07 | 2.01E+07 | 2.35E+07 |
| (25) RVΔG-Cre (on B19L-G_01 cells)                             | 1.71E+05 | 2.04E+06 | 1.14E+07 | 1.36E+07 | 1.37E+07 |
| (26) RVΔG-Cre (on B19L-G_01 cells)                             | 1.84E+05 | 2.40E+06 | 1.09E+07 | 1.18E+07 | 1.36E+07 |
| (27) RVΔG-Cre (on B19L-G_01 cells)                             | 1.65E+05 | 2.01E+06 | 9.61E+06 | 1.02E+07 | 1.14E+07 |

| FACS data from Multi-step growth curves (Infectious units/mL) | 24hr     | 48hr     | 72hr     | 96hr     | 120hr    |
|---------------------------------------------------------------|----------|----------|----------|----------|----------|
| (4) RVΔGL-Cre (on B19L-G_01 cells)                            | 6.22E+03 | 4.36E+04 | 5.17E+05 | 7.09E+05 | 1.21E+06 |
| (5) RVΔGL-Cre (on B19L-G_01 cells)                            | 7.77E+03 | 4.39E+04 | 4.47E+05 | 7.78E+05 | 9.81E+05 |
| (6) RVΔGL-Cre (on B19L-G_01 cells)                            | 5.91E+03 | 6.31E+04 | 4.30E+05 | 6.82E+05 | 9.70E+05 |
| (10) RVΔL-Cre (on B19L_02 cells)                              | 6.84E+03 | 5.48E+05 | 5.50E+06 | 9.25E+06 | 1.26E+07 |
| (11) RVΔL-Cre (on B19L_02 cells)                              | 5.28E+03 | 2.96E+05 | 4.67E+06 | 9.18E+06 | 1.34E+07 |
| (12) RVΔL-Cre (on B19L_02 cells)                              | 5.59E+03 | 6.57E+05 | 6.63E+06 | 1.07E+07 | 1.34E+07 |
| (16) RVΔL-Cre (on B19L-G_01 cells)                            | 8.71E+03 | 1.31E+06 | 7.69E+06 | 5.80E+06 | 6.84E+06 |
| (17) RVΔL-Cre (on B19L-G_01 cells)                            | 4.04E+03 | 1.38E+06 | 6.40E+06 | 6.33E+06 | 6.57E+06 |
| (18) RVΔL-Cre (on B19L-G_01 cells)                            | 5.91E+03 | 1.11E+06 | 5.39E+06 | 5.40E+06 | 6.11E+06 |
| (22) RVΔG-Cre (on B19G3-2 cells)                              | 3.31E+04 | 1.70E+06 | 7.96E+06 | 8.63E+06 | 7.39E+06 |
| (23) RVΔG-Cre (on B19G3-2 cells)                              | 2.24E+04 | 6.82E+05 | 4.13E+06 | 5.36E+06 | 4.99E+06 |
| (24) RVΔG-Cre (on B19G3-2 cells)                              | 2.43E+04 | 8.56E+05 | 4.41E+06 | 6.52E+06 | 5.61E+06 |
| (28) RVΔG-Cre (on B19L-G_01 cells)                            | 6.84E+03 | 6.25E+04 | 5.56E+05 | 2.23E+06 | 5.91E+06 |
| (29) RVΔG-Cre (on B19L-G_01 cells)                            | 5.28E+03 | 3.23E+04 | 3.33E+05 | 1.27E+06 | 4.70E+06 |
| (30) RVΔG-Cre (on B19L-G_01 cells)                            | 8.40E+03 | 4.24E+04 | 4.88E+05 | 1.67E+06 | 5.21E+06 |

| Average titers for Single-step growth curves (Infectious units/mL) | 24hr     | 48hr     | 72hr     | 96hr     | 120hr    |
|--------------------------------------------------------------------|----------|----------|----------|----------|----------|
| (1-3) RVΔGL-Cre (on B19L-G_01 cells)                               | 1.64E+05 | 1.95E+06 | 2.37E+06 | 1.69E+06 | 1.86E+06 |
| (7-9) RVΔL-Cre (on B19L_02 cells)                                  | 9.12E+05 | 1.61E+07 | 2.32E+07 | 2.60E+07 | 1.91E+07 |
| (13-15) RVΔL-Cre (on B19L-G_01 cells)                              | 1.60E+06 | 1.92E+07 | 1.96E+07 | 1.68E+07 | 1.76E+07 |
| (19-21) RVΔG-Cre (on B19G3-2 cells)                                | 1.81E+06 | 2.85E+07 | 3.03E+07 | 2.55E+07 | 2.66E+07 |
| (25-27) RVΔG-Cre (on B19L-G_01 cells)                              | 1.73E+05 | 2.15E+06 | 1.06E+07 | 1.19E+07 | 1.29E+07 |

| Standard error of the mean for Single-step growth curves (Infectious units/mL) | 24hr     | 48hr     | 72hr     | 96hr     | 120hr    |
|--------------------------------------------------------------------------------|----------|----------|----------|----------|----------|
| (1-3) RVΔGL-Cre (on B19L-G_01 cells)                                           | 1.27E+04 | 3.12E+04 | 6.11E+04 | 7.25E+04 | 6.73E+04 |
| (7-9) RVΔL-Cre (on B19L_02 cells)                                              | 1.37E+05 | 1.42E+06 | 1.45E+06 | 5.43E+05 | 1.16E+06 |
| (13-15) RVΔL-Cre (on B19L-G_01 cells)                                          | 1.64E+05 | 2.12E+05 | 3.21E+05 | 1.04E+06 | 3.02E+05 |
| (19-21) RVΔG-Cre (on B19G3-2 cells)                                            | 2.18E+05 | 3.29E+06 | 1.99E+06 | 2.94E+06 | 1.66E+06 |
| (25-27) RVΔG-Cre (on B19L-G_01 cells)                                          | 5.71E+03 | 1.24E+05 | 5.38E+05 | 9.85E+05 | 7.57E+05 |

| Average titers for Multi-step growth curves (Infectious units/mL) | 24hr     | 48hr     | 72hr     | 96hr     | 120hr    |
|-------------------------------------------------------------------|----------|----------|----------|----------|----------|
| (4-6) RVΔGL-Cre (on B19L-G_01 cells)                              | 6.63E+03 | 5.02E+04 | 4.65E+05 | 7.23E+05 | 1.05E+06 |
| (10-12) RVΔL-Cre (on B19L_02 cells)                               | 5.91E+03 | 5.00E+05 | 5.60E+06 | 9.72E+06 | 1.31E+07 |
| (16-18) RVΔL-Cre (on B19L-G_01 cells)                             | 6.22E+03 | 1.27E+06 | 6.49E+06 | 5.84E+06 | 6.51E+06 |
| (22-24) RVΔG-Cre (on B19G3-2 cells)                               | 2.66E+04 | 1.08E+06 | 5.50E+06 | 6.83E+06 | 6.00E+06 |
| (28-30) RVΔG-Cre (on B19L-G_01 cells)                             | 6.84E+03 | 4.57E+04 | 4.59E+05 | 1.72E+06 | 5.27E+06 |

| Standard error of the mean for Multi-step growth curves | 24hr     | 48hr     | 72hr     | 96hr     | 120hr    |
|---------------------------------------------------------|----------|----------|----------|----------|----------|
| (4-6) RVΔGL-Cre (on B19L-G_01 cells)                    | 5.78E+02 | 6.45E+03 | 2.69E+04 | 2.87E+04 | 7.74E+04 |
| (10-12) RVΔL-Cre (on B19L_02 cells)                     | 4.75E+02 | 1.07E+05 | 5.70E+05 | 5.06E+05 | 2.77E+05 |
| (16-18) RVΔL-Cre (on B19L-G_01 cells)                   | 1.36E+03 | 8.07E+04 | 6.63E+05 | 2.71E+05 | 2.13E+05 |
| (22-24) RVΔG-Cre (on B19G3-2 cells)                     | 3.28E+03 | 3.16E+05 | 1.23E+06 | 9.57E+05 | 7.18E+05 |
| (28-30) RVΔG-Cre (on B19L-G_01 cells)                   | 8.98E+02 | 8.87E+03 | 6.60E+04 | 2.80E+05 | 3.51E+05 |

| Conditions with the highest average titers for Single-step growth curves | Infectious units/mL |
|--------------------------------------------------------------------------|---------------------|
| (1-3) RVΔGL-Cre (on B19L-G_01 cells): 72hr                               | 2.39E+06            |
|                                                                          | 2.46E+06            |
|                                                                          | 2.25E+06            |
| (7-9) RVΔL-Cre (on B19L_02 cells): 96hr                                  | 2.71E+07            |
|                                                                          | 2.54E+07            |
|                                                                          | 2.56E+07            |
| (19-21) RVΔG-Cre (on B19G3-2 cells): 72hr                                | 3.22E+07            |
|                                                                          | 3.24E+07            |
|                                                                          | 2.64E+07            |

| Column1                              | Column2  |
|--------------------------------------|----------|
| average "titer" of BC-FLEX cells:    |          |
| 3.63E+03                             |          |
| Individual BC-FLEX negative "titers" |          |
| NEG_01                               | 5.28E+03 |
| NEG_02                               | 5.91E+03 |
| NEG_03                               | 3.11E+03 |
| NEG_04                               | 2.80E+03 |
| NEG_05                               | 2.17E+03 |
| NEG_06                               | 2.49E+03 |

| Conditions with the highest average titers for Multi-step growth curves | Infectious units/mL |
|-------------------------------------------------------------------------|---------------------|
| (4-6) RVΔGL-Cre (on B19L-G_01 cells): 120hr                             | 1.21E+06            |
|                                                                         | 9.81E+05            |
|                                                                         | 9.70E+05            |
| (10-12) RVΔL-Cre (on B19L_02 cells): 120hr                              | 1.26E+07            |
|                                                                         | 1.34E+07            |
|                                                                         | 1.34E+07            |
| (22-24) RVΔG-Cre (on B19G3-2 cells): 96hr                               | 8.63E+06            |
|                                                                         | 5.36E+06            |
|                                                                         | 6.52E+06            |

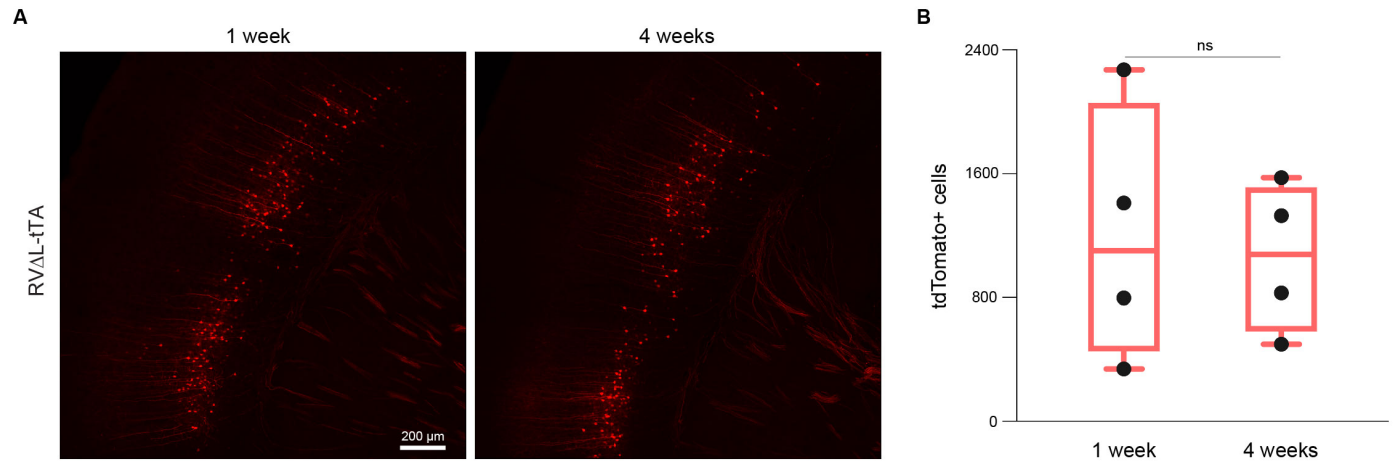

795  
796  
797  
798  
799  
800  
801  
802  
803  
804  
805  
806

**Figure S3. Retrograde targeting with third-generation ( $\Delta$ L) rabies virus expressing the tetracycline transactivator, Related to Figure 2**

(A) Corticothalamic neurons retrogradely labeled by a  $\Delta$ L virus expressing tTA injected in the somatosensory thalamus of Ai63 reporter mice (Daigle et al., 2018) (tdTomato driven by TRE-tight) 1 week (left image) or 4 weeks (right image) prior to perfusion. Scale bar: 200  $\mu$ m, applies to both images.

(B) Counts of total labeled cortical neurons across every sixth section (see Methods) of each mouse brain. Numbers are not significantly different between the two time points (single factor ANOVA,  $p = 0.772$ ,  $n = 4$  mice per group).



807  
808  
809  
810  
811

**File S2. Cell counts and statistics for retrograde targeting experiments, Related to Figure 2**

*See following pages.*

| Condition          | Mouse number | Section number | Cell counts |
|--------------------|--------------|----------------|-------------|
| RVΔGL-Flpo: 1 week | 21021505LJ   | 10             | 5           |
| RVΔGL-Flpo: 1 week | 21021505LJ   | 11             | 8           |
| RVΔGL-Flpo: 1 week | 21021505LJ   | 12             | 9           |
| RVΔGL-Flpo: 1 week | 21021505LJ   | total:         | 22          |
| RVΔGL-Flpo: 1 week | 21021506LJ   | 9              | 5           |
| RVΔGL-Flpo: 1 week | 21021506LJ   | 10             | 6           |
| RVΔGL-Flpo: 1 week | 21021506LJ   | 11             | 4           |
| RVΔGL-Flpo: 1 week | 21021506LJ   | 12             | 3           |
| RVΔGL-Flpo: 1 week | 21021506LJ   | total:         | 18          |
| RVΔGL-Flpo: 1 week | 21021507LJ   | 5              | 1           |
| RVΔGL-Flpo: 1 week | 21021507LJ   | 6              | 27          |
| RVΔGL-Flpo: 1 week | 21021507LJ   | 7              | 29          |
| RVΔGL-Flpo: 1 week | 21021507LJ   | 8              | 25          |
| RVΔGL-Flpo: 1 week | 21021507LJ   | 9              | 20          |
| RVΔGL-Flpo: 1 week | 21021507LJ   | 10             | 10          |
| RVΔGL-Flpo: 1 week | 21021507LJ   | 11             | 4           |
| RVΔGL-Flpo: 1 week | 21021507LJ   | 12             | 3           |
| RVΔGL-Flpo: 1 week | 21021507LJ   | 13             | 2           |
| RVΔGL-Flpo: 1 week | 21021507LJ   | total:         | 121         |
| RVΔGL-Flpo: 1 week | 21021508LJ   | 11             | 1           |
| RVΔGL-Flpo: 1 week | 21021508LJ   | 15             | 1           |
| RVΔGL-Flpo: 1 week | 21021508LJ   | total:         | 2           |
| RVΔGL-Flpo: 1 week | 21052505LJ   | 9              | 1           |
| RVΔGL-Flpo: 1 week | 21052505LJ   | 10             | 5           |
| RVΔGL-Flpo: 1 week | 21052505LJ   | 11             | 1           |
| RVΔGL-Flpo: 1 week | 21052505LJ   | total:         | 7           |
| RVΔGL-Flpo: 1 week | 21052506LJ   | 11             | 4           |
| RVΔGL-Flpo: 1 week | 21052506LJ   | 12             | 4           |
| RVΔGL-Flpo: 1 week | 21052506LJ   | total:         | 8           |
| RVΔGL-Flpo: 1 week | 21052507LJ   | 6              | 2           |
| RVΔGL-Flpo: 1 week | 21052507LJ   | 7              | 20          |
| RVΔGL-Flpo: 1 week | 21052507LJ   | 8              | 45          |
| RVΔGL-Flpo: 1 week | 21052507LJ   | 9              | 26          |
| RVΔGL-Flpo: 1 week | 21052507LJ   | 10             | 5           |
| RVΔGL-Flpo: 1 week | 21052507LJ   | total:         | 98          |
| RVΔGL-Flpo: 1 week | 21052508LJ   | 8              | 1           |
| RVΔGL-Flpo: 1 week | 21052508LJ   | 10             | 1           |
| RVΔGL-Flpo: 1 week | 21052508LJ   | 11             | 1           |
| RVΔGL-Flpo: 1 week | 21052508LJ   | 12             | 1           |
| RVΔGL-Flpo: 1 week | 21052508LJ   | 14             | 2           |
| RVΔGL-Flpo: 1 week | 21052508LJ   | total:         | 6           |
| RVΔL-Flpo: 1 week  | 21021805LJ   | 1              | 57          |
| RVΔL-Flpo: 1 week  | 21021805LJ   | 2              | 20          |
| RVΔL-Flpo: 1 week  | 21021805LJ   | 3              | 11          |
| RVΔL-Flpo: 1 week  | 21021805LJ   | 4              | 115         |
| RVΔL-Flpo: 1 week  | 21021805LJ   | 5              | 270         |
| RVΔL-Flpo: 1 week  | 21021805LJ   | 6              | 399         |
| RVΔL-Flpo: 1 week  | 21021805LJ   | 7              | 428         |
| RVΔL-Flpo: 1 week  | 21021805LJ   | 8              | 542         |
| RVΔL-Flpo: 1 week  | 21021805LJ   | 9              | 416         |
| RVΔL-Flpo: 1 week  | 21021805LJ   | 10             | 368         |
| RVΔL-Flpo: 1 week  | 21021805LJ   | 11             | 240         |
| RVΔL-Flpo: 1 week  | 21021805LJ   | 12             | 106         |
| RVΔL-Flpo: 1 week  | 21021805LJ   | 13             | 42          |

|                   |            |        |      |
|-------------------|------------|--------|------|
| RVΔL-Flpo: 1 week | 21021805LJ | 14     | 52   |
| RVΔL-Flpo: 1 week | 21021805LJ | 15     | 27   |
| RVΔL-Flpo: 1 week | 21021805LJ | total: | 3093 |
| RVΔL-Flpo: 1 week | 21021806LJ | 1      | 1    |
| RVΔL-Flpo: 1 week | 21021806LJ | 4      | 5    |
| RVΔL-Flpo: 1 week | 21021806LJ | 5      | 3    |
| RVΔL-Flpo: 1 week | 21021806LJ | 6      | 4    |
| RVΔL-Flpo: 1 week | 21021806LJ | 7      | 16   |
| RVΔL-Flpo: 1 week | 21021806LJ | 8      | 35   |
| RVΔL-Flpo: 1 week | 21021806LJ | 9      | 93   |
| RVΔL-Flpo: 1 week | 21021806LJ | 10     | 74   |
| RVΔL-Flpo: 1 week | 21021806LJ | 11     | 40   |
| RVΔL-Flpo: 1 week | 21021806LJ | 12     | 24   |
| RVΔL-Flpo: 1 week | 21021806LJ | 13     | 11   |
| RVΔL-Flpo: 1 week | 21021806LJ | 14     | 7    |
| RVΔL-Flpo: 1 week | 21021806LJ | 15     | 7    |
| RVΔL-Flpo: 1 week | 21021806LJ | total: | 320  |
| RVΔL-Flpo: 1 week | 21021807LJ | 5      | 1    |
| RVΔL-Flpo: 1 week | 21021807LJ | 6      | 2    |
| RVΔL-Flpo: 1 week | 21021807LJ | 7      | 6    |
| RVΔL-Flpo: 1 week | 21021807LJ | 8      | 8    |
| RVΔL-Flpo: 1 week | 21021807LJ | 9      | 35   |
| RVΔL-Flpo: 1 week | 21021807LJ | 10     | 64   |
| RVΔL-Flpo: 1 week | 21021807LJ | 11     | 80   |
| RVΔL-Flpo: 1 week | 21021807LJ | 12     | 55   |
| RVΔL-Flpo: 1 week | 21021807LJ | 13     | 34   |
| RVΔL-Flpo: 1 week | 21021807LJ | 14     | 13   |
| RVΔL-Flpo: 1 week | 21021807LJ | 15     | 13   |
| RVΔL-Flpo: 1 week | 21021807LJ | total: | 311  |
| RVΔL-Flpo: 1 week | 21021808LJ | 6      | 7    |
| RVΔL-Flpo: 1 week | 21021808LJ | 7      | 13   |
| RVΔL-Flpo: 1 week | 21021808LJ | 8      | 48   |
| RVΔL-Flpo: 1 week | 21021808LJ | 9      | 74   |
| RVΔL-Flpo: 1 week | 21021808LJ | 10     | 57   |
| RVΔL-Flpo: 1 week | 21021808LJ | 11     | 20   |
| RVΔL-Flpo: 1 week | 21021808LJ | 12     | 13   |
| RVΔL-Flpo: 1 week | 21021808LJ | 13     | 13   |
| RVΔL-Flpo: 1 week | 21021808LJ | 14     | 14   |
| RVΔL-Flpo: 1 week | 21021808LJ | 15     | 4    |
| RVΔL-Flpo: 1 week | 21021808LJ | total: | 263  |
| RVΔL-Flpo: 1 week | 21052607LJ | 4      | 3    |
| RVΔL-Flpo: 1 week | 21052607LJ | 5      | 2    |
| RVΔL-Flpo: 1 week | 21052607LJ | 6      | 4    |
| RVΔL-Flpo: 1 week | 21052607LJ | 7      | 11   |
| RVΔL-Flpo: 1 week | 21052607LJ | 8      | 10   |
| RVΔL-Flpo: 1 week | 21052607LJ | 9      | 4    |
| RVΔL-Flpo: 1 week | 21052607LJ | 11     | 6    |
| RVΔL-Flpo: 1 week | 21052607LJ | 12     | 7    |
| RVΔL-Flpo: 1 week | 21052607LJ | total: | 47   |
| RVΔL-Flpo: 1 week | 21052608LJ | 1      | 105  |
| RVΔL-Flpo: 1 week | 21052608LJ | 2      | 116  |
| RVΔL-Flpo: 1 week | 21052608LJ | 3      | 110  |
| RVΔL-Flpo: 1 week | 21052608LJ | 4      | 192  |
| RVΔL-Flpo: 1 week | 21052608LJ | 5      | 395  |
| RVΔL-Flpo: 1 week | 21052608LJ | 6      | 389  |

|                     |            |        |      |
|---------------------|------------|--------|------|
| RVΔL-Flpo: 1 week   | 21052608LJ | 7      | 421  |
| RVΔL-Flpo: 1 week   | 21052608LJ | 8      | 340  |
| RVΔL-Flpo: 1 week   | 21052608LJ | 9      | 72   |
| RVΔL-Flpo: 1 week   | 21052608LJ | 10     | 14   |
| RVΔL-Flpo: 1 week   | 21052608LJ | 11     | 5    |
| RVΔL-Flpo: 1 week   | 21052608LJ | 12     | 2    |
| RVΔL-Flpo: 1 week   | 21052608LJ | total: | 2161 |
| RVΔL-Flpo: 1 week   | 21060302LJ | 1      | 8    |
| RVΔL-Flpo: 1 week   | 21060302LJ | 2      | 10   |
| RVΔL-Flpo: 1 week   | 21060302LJ | 3      | 17   |
| RVΔL-Flpo: 1 week   | 21060302LJ | 4      | 24   |
| RVΔL-Flpo: 1 week   | 21060302LJ | 5      | 22   |
| RVΔL-Flpo: 1 week   | 21060302LJ | 6      | 29   |
| RVΔL-Flpo: 1 week   | 21060302LJ | 7      | 34   |
| RVΔL-Flpo: 1 week   | 21060302LJ | 8      | 59   |
| RVΔL-Flpo: 1 week   | 21060302LJ | 9      | 78   |
| RVΔL-Flpo: 1 week   | 21060302LJ | 10     | 46   |
| RVΔL-Flpo: 1 week   | 21060302LJ | 11     | 16   |
| RVΔL-Flpo: 1 week   | 21060302LJ | 12     | 12   |
| RVΔL-Flpo: 1 week   | 21060302LJ | 13     | 6    |
| RVΔL-Flpo: 1 week   | 21060302LJ | 14     | 2    |
| RVΔL-Flpo: 1 week   | 21060302LJ | 15     | 2    |
| RVΔL-Flpo: 1 week   | 21060302LJ | total: | 365  |
| RVΔL-Flpo: 1 week   | 21060303LJ | 1      | 7    |
| RVΔL-Flpo: 1 week   | 21060303LJ | 2      | 9    |
| RVΔL-Flpo: 1 week   | 21060303LJ | 3      | 10   |
| RVΔL-Flpo: 1 week   | 21060303LJ | 4      | 16   |
| RVΔL-Flpo: 1 week   | 21060303LJ | 5      | 22   |
| RVΔL-Flpo: 1 week   | 21060303LJ | 6      | 27   |
| RVΔL-Flpo: 1 week   | 21060303LJ | 7      | 25   |
| RVΔL-Flpo: 1 week   | 21060303LJ | 8      | 27   |
| RVΔL-Flpo: 1 week   | 21060303LJ | 9      | 36   |
| RVΔL-Flpo: 1 week   | 21060303LJ | 10     | 30   |
| RVΔL-Flpo: 1 week   | 21060303LJ | 11     | 15   |
| RVΔL-Flpo: 1 week   | 21060303LJ | 12     | 7    |
| RVΔL-Flpo: 1 week   | 21060303LJ | 14     | 6    |
| RVΔL-Flpo: 1 week   | 21060303LJ | 15     | 1    |
| RVΔL-Flpo: 1 week   | 21060303LJ | total: | 238  |
| RVΔGL-Flpo: 4 weeks | 21021501LJ | 7      | 2    |
| RVΔGL-Flpo: 4 weeks | 21021501LJ | 8      | 12   |
| RVΔGL-Flpo: 4 weeks | 21021501LJ | 9      | 25   |
| RVΔGL-Flpo: 4 weeks | 21021501LJ | 10     | 26   |
| RVΔGL-Flpo: 4 weeks | 21021501LJ | 11     | 7    |
| RVΔGL-Flpo: 4 weeks | 21021501LJ | 12     | 3    |
| RVΔGL-Flpo: 4 weeks | 21021501LJ | 13     | 3    |
| RVΔGL-Flpo: 4 weeks | 21021501LJ | 14     | 1    |
| RVΔGL-Flpo: 4 weeks | 21021501LJ | 15     | 1    |
| RVΔGL-Flpo: 4 weeks | 21021501LJ | total: | 80   |
| RVΔGL-Flpo: 4 weeks | 21021502LJ | 9      | 2    |
| RVΔGL-Flpo: 4 weeks | 21021502LJ | 10     | 25   |
| RVΔGL-Flpo: 4 weeks | 21021502LJ | 11     | 26   |
| RVΔGL-Flpo: 4 weeks | 21021502LJ | 12     | 5    |
| RVΔGL-Flpo: 4 weeks | 21021502LJ | 13     | 4    |
| RVΔGL-Flpo: 4 weeks | 21021502LJ | total: | 62   |
| RVΔGL-Flpo: 4 weeks | 21021503LJ | 1      | 88   |

|                     |            |        |      |
|---------------------|------------|--------|------|
| RVΔGL-Flpo: 4 weeks | 21021503LJ | 2      | 129  |
| RVΔGL-Flpo: 4 weeks | 21021503LJ | 3      | 199  |
| RVΔGL-Flpo: 4 weeks | 21021503LJ | 4      | 254  |
| RVΔGL-Flpo: 4 weeks | 21021503LJ | 5      | 312  |
| RVΔGL-Flpo: 4 weeks | 21021503LJ | 6      | 396  |
| RVΔGL-Flpo: 4 weeks | 21021503LJ | 7      | 351  |
| RVΔGL-Flpo: 4 weeks | 21021503LJ | 8      | 391  |
| RVΔGL-Flpo: 4 weeks | 21021503LJ | 9      | 359  |
| RVΔGL-Flpo: 4 weeks | 21021503LJ | 10     | 295  |
| RVΔGL-Flpo: 4 weeks | 21021503LJ | 11     | 133  |
| RVΔGL-Flpo: 4 weeks | 21021503LJ | 12     | 216  |
| RVΔGL-Flpo: 4 weeks | 21021503LJ | 13     | 59   |
| RVΔGL-Flpo: 4 weeks | 21021503LJ | 14     | 40   |
| RVΔGL-Flpo: 4 weeks | 21021503LJ | 15     | 32   |
| RVΔGL-Flpo: 4 weeks | 21021503LJ | total: | 3254 |
| RVΔGL-Flpo: 4 weeks | 21021504LJ | 3      | 1    |
| RVΔGL-Flpo: 4 weeks | 21021504LJ | 4      | 4    |
| RVΔGL-Flpo: 4 weeks | 21021504LJ | 5      | 22   |
| RVΔGL-Flpo: 4 weeks | 21021504LJ | 6      | 24   |
| RVΔGL-Flpo: 4 weeks | 21021504LJ | 7      | 56   |
| RVΔGL-Flpo: 4 weeks | 21021504LJ | 8      | 78   |
| RVΔGL-Flpo: 4 weeks | 21021504LJ | 9      | 32   |
| RVΔGL-Flpo: 4 weeks | 21021504LJ | 10     | 18   |
| RVΔGL-Flpo: 4 weeks | 21021504LJ | 11     | 1    |
| RVΔGL-Flpo: 4 weeks | 21021504LJ | 12     | 1    |
| RVΔGL-Flpo: 4 weeks | 21021504LJ | total: | 237  |
| RVΔGL-Flpo: 4 weeks | 21052501LJ | 2      | 1    |
| RVΔGL-Flpo: 4 weeks | 21052501LJ | 4      | 1    |
| RVΔGL-Flpo: 4 weeks | 21052501LJ | 7      | 2    |
| RVΔGL-Flpo: 4 weeks | 21052501LJ | 8      | 6    |
| RVΔGL-Flpo: 4 weeks | 21052501LJ | 9      | 9    |
| RVΔGL-Flpo: 4 weeks | 21052501LJ | 10     | 9    |
| RVΔGL-Flpo: 4 weeks | 21052501LJ | 11     | 2    |
| RVΔGL-Flpo: 4 weeks | 21052501LJ | 12     | 6    |
| RVΔGL-Flpo: 4 weeks | 21052501LJ | 13     | 4    |
| RVΔGL-Flpo: 4 weeks | 21052501LJ | 14     | 1    |
| RVΔGL-Flpo: 4 weeks | 21052501LJ | 15     | 2    |
| RVΔGL-Flpo: 4 weeks | 21052501LJ | total: | 43   |
| RVΔGL-Flpo: 4 weeks | 21052502LJ | 6      | 2    |
| RVΔGL-Flpo: 4 weeks | 21052502LJ | 7      | 1    |
| RVΔGL-Flpo: 4 weeks | 21052502LJ | 8      | 4    |
| RVΔGL-Flpo: 4 weeks | 21052502LJ | 11     | 1    |
| RVΔGL-Flpo: 4 weeks | 21052502LJ | 14     | 3    |
| RVΔGL-Flpo: 4 weeks | 21052502LJ | 15     | 3    |
| RVΔGL-Flpo: 4 weeks | 21052502LJ | total: | 14   |
| RVΔGL-Flpo: 4 weeks | 21052503LJ | 6      | 2    |
| RVΔGL-Flpo: 4 weeks | 21052503LJ | 8      | 1    |
| RVΔGL-Flpo: 4 weeks | 21052503LJ | 9      | 9    |
| RVΔGL-Flpo: 4 weeks | 21052503LJ | 10     | 45   |
| RVΔGL-Flpo: 4 weeks | 21052503LJ | 11     | 33   |
| RVΔGL-Flpo: 4 weeks | 21052503LJ | 12     | 17   |
| RVΔGL-Flpo: 4 weeks | 21052503LJ | 13     | 10   |
| RVΔGL-Flpo: 4 weeks | 21052503LJ | 14     | 7    |
| RVΔGL-Flpo: 4 weeks | 21052503LJ | 15     | 6    |
| RVΔGL-Flpo: 4 weeks | 21052503LJ | total: | 130  |

|                     |            |        |      |
|---------------------|------------|--------|------|
| RVΔGL-Flpo: 4 weeks | 21052504LJ | 7      | 2    |
| RVΔGL-Flpo: 4 weeks | 21052504LJ | 8      | 13   |
| RVΔGL-Flpo: 4 weeks | 21052504LJ | 9      | 18   |
| RVΔGL-Flpo: 4 weeks | 21052504LJ | 10     | 16   |
| RVΔGL-Flpo: 4 weeks | 21052504LJ | 11     | 8    |
| RVΔGL-Flpo: 4 weeks | 21052504LJ | 12     | 3    |
| RVΔGL-Flpo: 4 weeks | 21052504LJ | 13     | 3    |
| RVΔGL-Flpo: 4 weeks | 21052504LJ | 14     | 1    |
| RVΔGL-Flpo: 4 weeks | 21052504LJ | 15     | 1    |
| RVΔGL-Flpo: 4 weeks | 21052504LJ | total: | 65   |
| RVΔL-Flpo: 4 weeks  | 21021801LJ | 1      | 36   |
| RVΔL-Flpo: 4 weeks  | 21021801LJ | 2      | 18   |
| RVΔL-Flpo: 4 weeks  | 21021801LJ | 3      | 2    |
| RVΔL-Flpo: 4 weeks  | 21021801LJ | 4      | 28   |
| RVΔL-Flpo: 4 weeks  | 21021801LJ | 5      | 180  |
| RVΔL-Flpo: 4 weeks  | 21021801LJ | 6      | 415  |
| RVΔL-Flpo: 4 weeks  | 21021801LJ | 7      | 622  |
| RVΔL-Flpo: 4 weeks  | 21021801LJ | 8      | 649  |
| RVΔL-Flpo: 4 weeks  | 21021801LJ | 9      | 739  |
| RVΔL-Flpo: 4 weeks  | 21021801LJ | 10     | 577  |
| RVΔL-Flpo: 4 weeks  | 21021801LJ | 11     | 431  |
| RVΔL-Flpo: 4 weeks  | 21021801LJ | 12     | 211  |
| RVΔL-Flpo: 4 weeks  | 21021801LJ | 13     | 166  |
| RVΔL-Flpo: 4 weeks  | 21021801LJ | 14     | 170  |
| RVΔL-Flpo: 4 weeks  | 21021801LJ | 15     | 370  |
| RVΔL-Flpo: 4 weeks  | 21021801LJ | total: | 4614 |
| RVΔL-Flpo: 4 weeks  | 21021802LJ | 1      | 3    |
| RVΔL-Flpo: 4 weeks  | 21021802LJ | 2      | 6    |
| RVΔL-Flpo: 4 weeks  | 21021802LJ | 3      | 8    |
| RVΔL-Flpo: 4 weeks  | 21021802LJ | 5      | 32   |
| RVΔL-Flpo: 4 weeks  | 21021802LJ | 6      | 224  |
| RVΔL-Flpo: 4 weeks  | 21021802LJ | 7      | 279  |
| RVΔL-Flpo: 4 weeks  | 21021802LJ | 8      | 287  |
| RVΔL-Flpo: 4 weeks  | 21021802LJ | 9      | 457  |
| RVΔL-Flpo: 4 weeks  | 21021802LJ | 10     | 501  |
| RVΔL-Flpo: 4 weeks  | 21021802LJ | 11     | 491  |
| RVΔL-Flpo: 4 weeks  | 21021802LJ | 12     | 211  |
| RVΔL-Flpo: 4 weeks  | 21021802LJ | 13     | 287  |
| RVΔL-Flpo: 4 weeks  | 21021802LJ | 14     | 220  |
| RVΔL-Flpo: 4 weeks  | 21021802LJ | total: | 3006 |
| RVΔL-Flpo: 4 weeks  | 21021803LJ | 2      | 6    |
| RVΔL-Flpo: 4 weeks  | 21021803LJ | 3      | 9    |
| RVΔL-Flpo: 4 weeks  | 21021803LJ | 4      | 48   |
| RVΔL-Flpo: 4 weeks  | 21021803LJ | 5      | 177  |
| RVΔL-Flpo: 4 weeks  | 21021803LJ | 6      | 247  |
| RVΔL-Flpo: 4 weeks  | 21021803LJ | 7      | 339  |
| RVΔL-Flpo: 4 weeks  | 21021803LJ | 8      | 316  |
| RVΔL-Flpo: 4 weeks  | 21021803LJ | 9      | 322  |
| RVΔL-Flpo: 4 weeks  | 21021803LJ | 10     | 205  |
| RVΔL-Flpo: 4 weeks  | 21021803LJ | 11     | 78   |
| RVΔL-Flpo: 4 weeks  | 21021803LJ | 12     | 46   |
| RVΔL-Flpo: 4 weeks  | 21021803LJ | 13     | 41   |
| RVΔL-Flpo: 4 weeks  | 21021803LJ | 14     | 13   |
| RVΔL-Flpo: 4 weeks  | 21021803LJ | total: | 1847 |
| RVΔL-Flpo: 4 weeks  | 21021804LJ | 1      | 6    |

|                    |            |        |      |
|--------------------|------------|--------|------|
| RVΔL-Flpo: 4 weeks | 21021804LJ | 2      | 14   |
| RVΔL-Flpo: 4 weeks | 21021804LJ | 3      | 2    |
| RVΔL-Flpo: 4 weeks | 21021804LJ | 4      | 57   |
| RVΔL-Flpo: 4 weeks | 21021804LJ | 5      | 359  |
| RVΔL-Flpo: 4 weeks | 21021804LJ | 6      | 414  |
| RVΔL-Flpo: 4 weeks | 21021804LJ | 7      | 469  |
| RVΔL-Flpo: 4 weeks | 21021804LJ | 8      | 576  |
| RVΔL-Flpo: 4 weeks | 21021804LJ | 9      | 533  |
| RVΔL-Flpo: 4 weeks | 21021804LJ | 10     | 383  |
| RVΔL-Flpo: 4 weeks | 21021804LJ | 11     | 283  |
| RVΔL-Flpo: 4 weeks | 21021804LJ | 12     | 114  |
| RVΔL-Flpo: 4 weeks | 21021804LJ | 13     | 34   |
| RVΔL-Flpo: 4 weeks | 21021804LJ | 14     | 87   |
| RVΔL-Flpo: 4 weeks | 21021804LJ | total: | 3331 |
| RVΔL-Flpo: 4 weeks | 21052601LJ | 2      | 1    |
| RVΔL-Flpo: 4 weeks | 21052601LJ | 3      | 1    |
| RVΔL-Flpo: 4 weeks | 21052601LJ | 5      | 16   |
| RVΔL-Flpo: 4 weeks | 21052601LJ | 6      | 10   |
| RVΔL-Flpo: 4 weeks | 21052601LJ | 7      | 28   |
| RVΔL-Flpo: 4 weeks | 21052601LJ | 8      | 92   |
| RVΔL-Flpo: 4 weeks | 21052601LJ | 9      | 161  |
| RVΔL-Flpo: 4 weeks | 21052601LJ | 10     | 232  |
| RVΔL-Flpo: 4 weeks | 21052601LJ | 11     | 280  |
| RVΔL-Flpo: 4 weeks | 21052601LJ | 12     | 201  |
| RVΔL-Flpo: 4 weeks | 21052601LJ | 13     | 143  |
| RVΔL-Flpo: 4 weeks | 21052601LJ | 14     | 106  |
| RVΔL-Flpo: 4 weeks | 21052601LJ | 15     | 98   |
| RVΔL-Flpo: 4 weeks | 21052601LJ | total: | 1369 |
| RVΔL-Flpo: 4 weeks | 21052602LJ | 1      | 49   |
| RVΔL-Flpo: 4 weeks | 21052602LJ | 2      | 12   |
| RVΔL-Flpo: 4 weeks | 21052602LJ | 3      | 17   |
| RVΔL-Flpo: 4 weeks | 21052602LJ | 4      | 51   |
| RVΔL-Flpo: 4 weeks | 21052602LJ | 5      | 163  |
| RVΔL-Flpo: 4 weeks | 21052602LJ | 6      | 418  |
| RVΔL-Flpo: 4 weeks | 21052602LJ | 7      | 489  |
| RVΔL-Flpo: 4 weeks | 21052602LJ | 8      | 526  |
| RVΔL-Flpo: 4 weeks | 21052602LJ | 9      | 510  |
| RVΔL-Flpo: 4 weeks | 21052602LJ | 10     | 319  |
| RVΔL-Flpo: 4 weeks | 21052602LJ | 11     | 179  |
| RVΔL-Flpo: 4 weeks | 21052602LJ | 12     | 72   |
| RVΔL-Flpo: 4 weeks | 21052602LJ | 13     | 48   |
| RVΔL-Flpo: 4 weeks | 21052602LJ | 14     | 32   |
| RVΔL-Flpo: 4 weeks | 21052602LJ | 15     | 34   |
| RVΔL-Flpo: 4 weeks | 21052602LJ | total: | 2919 |
| RVΔL-Flpo: 4 weeks | 21052603LJ | 1      | 38   |
| RVΔL-Flpo: 4 weeks | 21052603LJ | 2      | 33   |
| RVΔL-Flpo: 4 weeks | 21052603LJ | 3      | 16   |
| RVΔL-Flpo: 4 weeks | 21052603LJ | 4      | 44   |
| RVΔL-Flpo: 4 weeks | 21052603LJ | 5      | 302  |
| RVΔL-Flpo: 4 weeks | 21052603LJ | 6      | 648  |
| RVΔL-Flpo: 4 weeks | 21052603LJ | 7      | 636  |
| RVΔL-Flpo: 4 weeks | 21052603LJ | 8      | 666  |
| RVΔL-Flpo: 4 weeks | 21052603LJ | 9      | 582  |
| RVΔL-Flpo: 4 weeks | 21052603LJ | 10     | 409  |
| RVΔL-Flpo: 4 weeks | 21052603LJ | 11     | 207  |

|                    |            |        |       |
|--------------------|------------|--------|-------|
| RVΔL-Flpo: 4 weeks | 21052603LJ | 12     | 79    |
| RVΔL-Flpo: 4 weeks | 21052603LJ | 13     | 26    |
| RVΔL-Flpo: 4 weeks | 21052603LJ | 14     | 25    |
| RVΔL-Flpo: 4 weeks | 21052603LJ | 15     | 19    |
| RVΔL-Flpo: 4 weeks | 21052603LJ | total: | 3730  |
| RVΔL-Flpo: 4 weeks | 21052606LJ | 1      | 43    |
| RVΔL-Flpo: 4 weeks | 21052606LJ | 2      | 23    |
| RVΔL-Flpo: 4 weeks | 21052606LJ | 3      | 14    |
| RVΔL-Flpo: 4 weeks | 21052606LJ | 4      | 32    |
| RVΔL-Flpo: 4 weeks | 21052606LJ | 5      | 220   |
| RVΔL-Flpo: 4 weeks | 21052606LJ | 6      | 503   |
| RVΔL-Flpo: 4 weeks | 21052606LJ | 7      | 616   |
| RVΔL-Flpo: 4 weeks | 21052606LJ | 8      | 622   |
| RVΔL-Flpo: 4 weeks | 21052606LJ | 9      | 560   |
| RVΔL-Flpo: 4 weeks | 21052606LJ | 10     | 403   |
| RVΔL-Flpo: 4 weeks | 21052606LJ | 11     | 179   |
| RVΔL-Flpo: 4 weeks | 21052606LJ | 12     | 82    |
| RVΔL-Flpo: 4 weeks | 21052606LJ | 13     | 56    |
| RVΔL-Flpo: 4 weeks | 21052606LJ | 14     | 68    |
| RVΔL-Flpo: 4 weeks | 21052606LJ | 15     | 33    |
| RVΔL-Flpo: 4 weeks | 21052606LJ | total: | 3454  |
| RVΔGL-Cre: 1 week  | 21021703LJ | 1      | 422   |
| RVΔGL-Cre: 1 week  | 21021703LJ | 2      | 395   |
| RVΔGL-Cre: 1 week  | 21021703LJ | 3      | 606   |
| RVΔGL-Cre: 1 week  | 21021703LJ | 4      | 543   |
| RVΔGL-Cre: 1 week  | 21021703LJ | 5      | 637   |
| RVΔGL-Cre: 1 week  | 21021703LJ | 6      | 848   |
| RVΔGL-Cre: 1 week  | 21021703LJ | 7      | 1145  |
| RVΔGL-Cre: 1 week  | 21021703LJ | 8      | 1183  |
| RVΔGL-Cre: 1 week  | 21021703LJ | 9      | 1292  |
| RVΔGL-Cre: 1 week  | 21021703LJ | 10     | 1311  |
| RVΔGL-Cre: 1 week  | 21021703LJ | 11     | 1377  |
| RVΔGL-Cre: 1 week  | 21021703LJ | 12     | 1251  |
| RVΔGL-Cre: 1 week  | 21021703LJ | 13     | 998   |
| RVΔGL-Cre: 1 week  | 21021703LJ | 14     | 835   |
| RVΔGL-Cre: 1 week  | 21021703LJ | 15     | 641   |
| RVΔGL-Cre: 1 week  | 21021703LJ | total: | 13484 |
| RVΔGL-Cre: 1 week  | 21021704LJ | 1      | 918   |
| RVΔGL-Cre: 1 week  | 21021704LJ | 2      | 975   |
| RVΔGL-Cre: 1 week  | 21021704LJ | 3      | 1144  |
| RVΔGL-Cre: 1 week  | 21021704LJ | 4      | 1404  |
| RVΔGL-Cre: 1 week  | 21021704LJ | 5      | 1491  |
| RVΔGL-Cre: 1 week  | 21021704LJ | 6      | 1377  |
| RVΔGL-Cre: 1 week  | 21021704LJ | 7      | 1231  |
| RVΔGL-Cre: 1 week  | 21021704LJ | 8      | 1337  |
| RVΔGL-Cre: 1 week  | 21021704LJ | 9      | 1135  |
| RVΔGL-Cre: 1 week  | 21021704LJ | 10     | 1058  |
| RVΔGL-Cre: 1 week  | 21021704LJ | 11     | 711   |
| RVΔGL-Cre: 1 week  | 21021704LJ | 12     | 568   |
| RVΔGL-Cre: 1 week  | 21021704LJ | 13     | 443   |
| RVΔGL-Cre: 1 week  | 21021704LJ | 14     | 432   |
| RVΔGL-Cre: 1 week  | 21021704LJ | 15     | 411   |
| RVΔGL-Cre: 1 week  | 21021704LJ | total: | 14635 |
| RVΔGL-Cre: 1 week  | 21021707LJ | 1      | 497   |
| RVΔGL-Cre: 1 week  | 21021707LJ | 2      | 568   |



|                   |            |        |       |
|-------------------|------------|--------|-------|
| RVΔGL-Cre: 1 week | 21021707LJ | 3      | 454   |
| RVΔGL-Cre: 1 week | 21021707LJ | 4      | 454   |
| RVΔGL-Cre: 1 week | 21021707LJ | 5      | 583   |
| RVΔGL-Cre: 1 week | 21021707LJ | 6      | 873   |
| RVΔGL-Cre: 1 week | 21021707LJ | 7      | 973   |
| RVΔGL-Cre: 1 week | 21021707LJ | 8      | 1133  |
| RVΔGL-Cre: 1 week | 21021707LJ | 9      | 1220  |
| RVΔGL-Cre: 1 week | 21021707LJ | 10     | 1176  |
| RVΔGL-Cre: 1 week | 21021707LJ | 11     | 994   |
| RVΔGL-Cre: 1 week | 21021707LJ | 12     | 645   |
| RVΔGL-Cre: 1 week | 21021707LJ | 13     | 467   |
| RVΔGL-Cre: 1 week | 21021707LJ | 14     | 330   |
| RVΔGL-Cre: 1 week | 21021707LJ | 15     | 280   |
| RVΔGL-Cre: 1 week | 21021707LJ | total: | 10647 |
| RVΔGL-Cre: 1 week | 21021708LJ | 1      | 271   |
| RVΔGL-Cre: 1 week | 21021708LJ | 2      | 303   |
| RVΔGL-Cre: 1 week | 21021708LJ | 3      | 386   |
| RVΔGL-Cre: 1 week | 21021708LJ | 4      | 634   |
| RVΔGL-Cre: 1 week | 21021708LJ | 5      | 805   |
| RVΔGL-Cre: 1 week | 21021708LJ | 6      | 931   |
| RVΔGL-Cre: 1 week | 21021708LJ | 7      | 1029  |
| RVΔGL-Cre: 1 week | 21021708LJ | 8      | 1186  |
| RVΔGL-Cre: 1 week | 21021708LJ | 9      | 1227  |
| RVΔGL-Cre: 1 week | 21021708LJ | 10     | 1102  |
| RVΔGL-Cre: 1 week | 21021708LJ | 11     | 1019  |
| RVΔGL-Cre: 1 week | 21021708LJ | 12     | 666   |
| RVΔGL-Cre: 1 week | 21021708LJ | 13     | 431   |
| RVΔGL-Cre: 1 week | 21021708LJ | 14     | 369   |
| RVΔGL-Cre: 1 week | 21021708LJ | 15     | 486   |
| RVΔGL-Cre: 1 week | 21021708LJ | total: | 10845 |
| RVΔL-Cre: 1 week  | 21021905LJ | 1      | 1161  |
| RVΔL-Cre: 1 week  | 21021905LJ | 2      | 1093  |
| RVΔL-Cre: 1 week  | 21021905LJ | 3      | 1072  |
| RVΔL-Cre: 1 week  | 21021905LJ | 4      | 1079  |
| RVΔL-Cre: 1 week  | 21021905LJ | 5      | 1318  |
| RVΔL-Cre: 1 week  | 21021905LJ | 6      | 1417  |
| RVΔL-Cre: 1 week  | 21021905LJ | 7      | 1541  |
| RVΔL-Cre: 1 week  | 21021905LJ | 8      | 1510  |
| RVΔL-Cre: 1 week  | 21021905LJ | 9      | 1500  |
| RVΔL-Cre: 1 week  | 21021905LJ | 10     | 1549  |
| RVΔL-Cre: 1 week  | 21021905LJ | 11     | 1381  |
| RVΔL-Cre: 1 week  | 21021905LJ | 12     | 1109  |
| RVΔL-Cre: 1 week  | 21021905LJ | 13     | 532   |
| RVΔL-Cre: 1 week  | 21021905LJ | 14     | 380   |
| RVΔL-Cre: 1 week  | 21021905LJ | 15     | 265   |
| RVΔL-Cre: 1 week  | 21021905LJ | total: | 16907 |
| RVΔL-Cre: 1 week  | 21021906LJ | 1      | 985   |
| RVΔL-Cre: 1 week  | 21021906LJ | 2      | 1012  |
| RVΔL-Cre: 1 week  | 21021906LJ | 3      | 1020  |
| RVΔL-Cre: 1 week  | 21021906LJ | 4      | 1060  |
| RVΔL-Cre: 1 week  | 21021906LJ | 5      | 1082  |
| RVΔL-Cre: 1 week  | 21021906LJ | 6      | 1515  |
| RVΔL-Cre: 1 week  | 21021906LJ | 7      | 1808  |
| RVΔL-Cre: 1 week  | 21021906LJ | 8      | 1675  |
| RVΔL-Cre: 1 week  | 21021906LJ | 9      | 1538  |

|                    |            |        |       |
|--------------------|------------|--------|-------|
| RVΔL-Cre: 1 week   | 21021906LJ | 10     | 1728  |
| RVΔL-Cre: 1 week   | 21021906LJ | 11     | 955   |
| RVΔL-Cre: 1 week   | 21021906LJ | 12     | 1018  |
| RVΔL-Cre: 1 week   | 21021906LJ | 13     | 993   |
| RVΔL-Cre: 1 week   | 21021906LJ | 14     | 701   |
| RVΔL-Cre: 1 week   | 21021906LJ | 15     | 483   |
| RVΔL-Cre: 1 week   | 21021906LJ | 16     | 350   |
| RVΔL-Cre: 1 week   | 21021906LJ | total: | 17923 |
| RVΔL-Cre: 1 week   | 21021907LJ | 1      | 1207  |
| RVΔL-Cre: 1 week   | 21021907LJ | 2      | 1083  |
| RVΔL-Cre: 1 week   | 21021907LJ | 3      | 1152  |
| RVΔL-Cre: 1 week   | 21021907LJ | 4      | 1225  |
| RVΔL-Cre: 1 week   | 21021907LJ | 5      | 1336  |
| RVΔL-Cre: 1 week   | 21021907LJ | 6      | 1558  |
| RVΔL-Cre: 1 week   | 21021907LJ | 7      | 1498  |
| RVΔL-Cre: 1 week   | 21021907LJ | 8      | 1709  |
| RVΔL-Cre: 1 week   | 21021907LJ | 9      | 1547  |
| RVΔL-Cre: 1 week   | 21021907LJ | 10     | 1718  |
| RVΔL-Cre: 1 week   | 21021907LJ | 11     | 1503  |
| RVΔL-Cre: 1 week   | 21021907LJ | 12     | 1249  |
| RVΔL-Cre: 1 week   | 21021907LJ | 13     | 845   |
| RVΔL-Cre: 1 week   | 21021907LJ | 14     | 626   |
| RVΔL-Cre: 1 week   | 21021907LJ | 15     | 495   |
| RVΔL-Cre: 1 week   | 21021907LJ | total: | 18751 |
| RVΔL-Cre: 1 week   | 21021908LJ | 1      | 1011  |
| RVΔL-Cre: 1 week   | 21021908LJ | 2      | 892   |
| RVΔL-Cre: 1 week   | 21021908LJ | 3      | 896   |
| RVΔL-Cre: 1 week   | 21021908LJ | 4      | 957   |
| RVΔL-Cre: 1 week   | 21021908LJ | 5      | 1243  |
| RVΔL-Cre: 1 week   | 21021908LJ | 6      | 1448  |
| RVΔL-Cre: 1 week   | 21021908LJ | 7      | 1568  |
| RVΔL-Cre: 1 week   | 21021908LJ | 8      | 1459  |
| RVΔL-Cre: 1 week   | 21021908LJ | 9      | 1573  |
| RVΔL-Cre: 1 week   | 21021908LJ | 10     | 1313  |
| RVΔL-Cre: 1 week   | 21021908LJ | 11     | 1146  |
| RVΔL-Cre: 1 week   | 21021908LJ | 12     | 1046  |
| RVΔL-Cre: 1 week   | 21021908LJ | 13     | 774   |
| RVΔL-Cre: 1 week   | 21021908LJ | 14     | 483   |
| RVΔL-Cre: 1 week   | 21021908LJ | 15     | 448   |
| RVΔL-Cre: 1 week   | 21021908LJ | total: | 16257 |
| RVΔGL-Cre: 4 weeks | 21021701LJ | 1      | 1314  |
| RVΔGL-Cre: 4 weeks | 21021701LJ | 2      | 1246  |
| RVΔGL-Cre: 4 weeks | 21021701LJ | 3      | 1351  |
| RVΔGL-Cre: 4 weeks | 21021701LJ | 4      | 1601  |
| RVΔGL-Cre: 4 weeks | 21021701LJ | 5      | 1668  |
| RVΔGL-Cre: 4 weeks | 21021701LJ | 6      | 1618  |
| RVΔGL-Cre: 4 weeks | 21021701LJ | 7      | 1593  |
| RVΔGL-Cre: 4 weeks | 21021701LJ | 8      | 1757  |
| RVΔGL-Cre: 4 weeks | 21021701LJ | 9      | 1730  |
| RVΔGL-Cre: 4 weeks | 21021701LJ | 10     | 1600  |
| RVΔGL-Cre: 4 weeks | 21021701LJ | 11     | 1268  |
| RVΔGL-Cre: 4 weeks | 21021701LJ | 12     | 931   |
| RVΔGL-Cre: 4 weeks | 21021701LJ | 13     | 652   |
| RVΔGL-Cre: 4 weeks | 21021701LJ | 14     | 491   |
| RVΔGL-Cre: 4 weeks | 21021701LJ | 15     | 336   |

|                    |            |        |       |
|--------------------|------------|--------|-------|
| RVΔGL-Cre: 4 weeks | 21021701LJ | total: | 19156 |
| RVΔGL-Cre: 4 weeks | 21021702LJ | 1      | 957   |
| RVΔGL-Cre: 4 weeks | 21021702LJ | 2      | 1175  |
| RVΔGL-Cre: 4 weeks | 21021702LJ | 3      | 1414  |
| RVΔGL-Cre: 4 weeks | 21021702LJ | 4      | 1470  |
| RVΔGL-Cre: 4 weeks | 21021702LJ | 5      | 1481  |
| RVΔGL-Cre: 4 weeks | 21021702LJ | 6      | 1654  |
| RVΔGL-Cre: 4 weeks | 21021702LJ | 7      | 1616  |
| RVΔGL-Cre: 4 weeks | 21021702LJ | 8      | 1601  |
| RVΔGL-Cre: 4 weeks | 21021702LJ | 9      | 1717  |
| RVΔGL-Cre: 4 weeks | 21021702LJ | 10     | 1449  |
| RVΔGL-Cre: 4 weeks | 21021702LJ | 11     | 1132  |
| RVΔGL-Cre: 4 weeks | 21021702LJ | 12     | 871   |
| RVΔGL-Cre: 4 weeks | 21021702LJ | 13     | 587   |
| RVΔGL-Cre: 4 weeks | 21021702LJ | 14     | 456   |
| RVΔGL-Cre: 4 weeks | 21021702LJ | 15     | 355   |
| RVΔGL-Cre: 4 weeks | 21021702LJ | total: | 17935 |
| RVΔGL-Cre: 4 weeks | 21021705LJ | 1      | 892   |
| RVΔGL-Cre: 4 weeks | 21021705LJ | 2      | 824   |
| RVΔGL-Cre: 4 weeks | 21021705LJ | 3      | 879   |
| RVΔGL-Cre: 4 weeks | 21021705LJ | 4      | 1094  |
| RVΔGL-Cre: 4 weeks | 21021705LJ | 5      | 1182  |
| RVΔGL-Cre: 4 weeks | 21021705LJ | 6      | 1318  |
| RVΔGL-Cre: 4 weeks | 21021705LJ | 7      | 1482  |
| RVΔGL-Cre: 4 weeks | 21021705LJ | 8      | 1637  |
| RVΔGL-Cre: 4 weeks | 21021705LJ | 9      | 1666  |
| RVΔGL-Cre: 4 weeks | 21021705LJ | 10     | 1796  |
| RVΔGL-Cre: 4 weeks | 21021705LJ | 11     | 1636  |
| RVΔGL-Cre: 4 weeks | 21021705LJ | 12     | 1415  |
| RVΔGL-Cre: 4 weeks | 21021705LJ | 13     | 1121  |
| RVΔGL-Cre: 4 weeks | 21021705LJ | 14     | 894   |
| RVΔGL-Cre: 4 weeks | 21021705LJ | 15     | 703   |
| RVΔGL-Cre: 4 weeks | 21021705LJ | total: | 18539 |
| RVΔGL-Cre: 4 weeks | 21021706LJ | 1      | 756   |
| RVΔGL-Cre: 4 weeks | 21021706LJ | 2      | 817   |
| RVΔGL-Cre: 4 weeks | 21021706LJ | 3      | 750   |
| RVΔGL-Cre: 4 weeks | 21021706LJ | 4      | 798   |
| RVΔGL-Cre: 4 weeks | 21021706LJ | 5      | 920   |
| RVΔGL-Cre: 4 weeks | 21021706LJ | 6      | 1337  |
| RVΔGL-Cre: 4 weeks | 21021706LJ | 7      | 1485  |
| RVΔGL-Cre: 4 weeks | 21021706LJ | 8      | 1490  |
| RVΔGL-Cre: 4 weeks | 21021706LJ | 9      | 1641  |
| RVΔGL-Cre: 4 weeks | 21021706LJ | 10     | 2004  |
| RVΔGL-Cre: 4 weeks | 21021706LJ | 11     | 1955  |
| RVΔGL-Cre: 4 weeks | 21021706LJ | 12     | 1453  |
| RVΔGL-Cre: 4 weeks | 21021706LJ | 13     | 1122  |
| RVΔGL-Cre: 4 weeks | 21021706LJ | 14     | 769   |
| RVΔGL-Cre: 4 weeks | 21021706LJ | 15     | 641   |
| RVΔGL-Cre: 4 weeks | 21021706LJ | total: | 17938 |
| RVΔL-Cre: 4 weeks  | 21021901LJ | 1      | 943   |
| RVΔL-Cre: 4 weeks  | 21021901LJ | 2      | 1003  |
| RVΔL-Cre: 4 weeks  | 21021901LJ | 3      | 1036  |
| RVΔL-Cre: 4 weeks  | 21021901LJ | 4      | 1195  |
| RVΔL-Cre: 4 weeks  | 21021901LJ | 5      | 1402  |
| RVΔL-Cre: 4 weeks  | 21021901LJ | 6      | 1739  |

|                   |            |        |       |
|-------------------|------------|--------|-------|
| RVΔL-Cre: 4 weeks | 21021901LJ | 7      | 1793  |
| RVΔL-Cre: 4 weeks | 21021901LJ | 8      | 1913  |
| RVΔL-Cre: 4 weeks | 21021901LJ | 9      | 2026  |
| RVΔL-Cre: 4 weeks | 21021901LJ | 10     | 1913  |
| RVΔL-Cre: 4 weeks | 21021901LJ | 11     | 1929  |
| RVΔL-Cre: 4 weeks | 21021901LJ | 12     | 1668  |
| RVΔL-Cre: 4 weeks | 21021901LJ | 13     | 1247  |
| RVΔL-Cre: 4 weeks | 21021901LJ | 14     | 1062  |
| RVΔL-Cre: 4 weeks | 21021901LJ | 15     | 874   |
| RVΔL-Cre: 4 weeks | 21021901LJ | total: | 21743 |
| RVΔL-Cre: 4 weeks | 21021902LJ | 1      | 1357  |
| RVΔL-Cre: 4 weeks | 21021902LJ | 2      | 1416  |
| RVΔL-Cre: 4 weeks | 21021902LJ | 3      | 1287  |
| RVΔL-Cre: 4 weeks | 21021902LJ | 4      | 1308  |
| RVΔL-Cre: 4 weeks | 21021902LJ | 5      | 1583  |
| RVΔL-Cre: 4 weeks | 21021902LJ | 6      | 1850  |
| RVΔL-Cre: 4 weeks | 21021902LJ | 7      | 2020  |
| RVΔL-Cre: 4 weeks | 21021902LJ | 8      | 2238  |
| RVΔL-Cre: 4 weeks | 21021902LJ | 9      | 2092  |
| RVΔL-Cre: 4 weeks | 21021902LJ | 10     | 2321  |
| RVΔL-Cre: 4 weeks | 21021902LJ | 11     | 2241  |
| RVΔL-Cre: 4 weeks | 21021902LJ | 12     | 1858  |
| RVΔL-Cre: 4 weeks | 21021902LJ | 13     | 1326  |
| RVΔL-Cre: 4 weeks | 21021902LJ | 14     | 1083  |
| RVΔL-Cre: 4 weeks | 21021902LJ | 15     | 793   |
| RVΔL-Cre: 4 weeks | 21021902LJ | total: | 24773 |
| RVΔL-Cre: 4 weeks | 21021903LJ | 1      | 1543  |
| RVΔL-Cre: 4 weeks | 21021903LJ | 2      | 1406  |
| RVΔL-Cre: 4 weeks | 21021903LJ | 3      | 1303  |
| RVΔL-Cre: 4 weeks | 21021903LJ | 4      | 1489  |
| RVΔL-Cre: 4 weeks | 21021903LJ | 5      | 1825  |
| RVΔL-Cre: 4 weeks | 21021903LJ | 6      | 1946  |
| RVΔL-Cre: 4 weeks | 21021903LJ | 7      | 1924  |
| RVΔL-Cre: 4 weeks | 21021903LJ | 8      | 2142  |
| RVΔL-Cre: 4 weeks | 21021903LJ | 9      | 2077  |
| RVΔL-Cre: 4 weeks | 21021903LJ | 10     | 1954  |
| RVΔL-Cre: 4 weeks | 21021903LJ | 11     | 1672  |
| RVΔL-Cre: 4 weeks | 21021903LJ | 12     | 1411  |
| RVΔL-Cre: 4 weeks | 21021903LJ | 13     | 1020  |
| RVΔL-Cre: 4 weeks | 21021903LJ | 14     | 687   |
| RVΔL-Cre: 4 weeks | 21021903LJ | 15     | 627   |
| RVΔL-Cre: 4 weeks | 21021903LJ | total: | 23026 |
| RVΔL-Cre: 4 weeks | 21021904LJ | 1      | 1592  |
| RVΔL-Cre: 4 weeks | 21021904LJ | 2      | 1466  |
| RVΔL-Cre: 4 weeks | 21021904LJ | 3      | 1355  |
| RVΔL-Cre: 4 weeks | 21021904LJ | 4      | 1599  |
| RVΔL-Cre: 4 weeks | 21021904LJ | 5      | 1736  |
| RVΔL-Cre: 4 weeks | 21021904LJ | 6      | 1862  |
| RVΔL-Cre: 4 weeks | 21021904LJ | 7      | 1794  |
| RVΔL-Cre: 4 weeks | 21021904LJ | 8      | 1930  |
| RVΔL-Cre: 4 weeks | 21021904LJ | 9      | 2047  |
| RVΔL-Cre: 4 weeks | 21021904LJ | 10     | 1584  |
| RVΔL-Cre: 4 weeks | 21021904LJ | 11     | 1755  |
| RVΔL-Cre: 4 weeks | 21021904LJ | 12     | 1431  |
| RVΔL-Cre: 4 weeks | 21021904LJ | 13     | 741   |

|                   |            |        |       |
|-------------------|------------|--------|-------|
| RVΔL-Cre: 4 weeks | 21021904LJ | 14     | 755   |
| RVΔL-Cre: 4 weeks | 21021904LJ | 15     | 625   |
| RVΔL-Cre: 4 weeks | 21021904LJ | total: | 22272 |
| RVΔL-5tTA: 1 week | 21042901LJ | 3      | 2     |
| RVΔL-5tTA: 1 week | 21042901LJ | 6      | 9     |
| RVΔL-5tTA: 1 week | 21042901LJ | 7      | 4     |
| RVΔL-5tTA: 1 week | 21042901LJ | 8      | 26    |
| RVΔL-5tTA: 1 week | 21042901LJ | 9      | 32    |
| RVΔL-5tTA: 1 week | 21042901LJ | 10     | 54    |
| RVΔL-5tTA: 1 week | 21042901LJ | 11     | 69    |
| RVΔL-5tTA: 1 week | 21042901LJ | 12     | 56    |
| RVΔL-5tTA: 1 week | 21042901LJ | 13     | 51    |
| RVΔL-5tTA: 1 week | 21042901LJ | 14     | 14    |
| RVΔL-5tTA: 1 week | 21042901LJ | 15     | 22    |
| RVΔL-5tTA: 1 week | 21042901LJ | total: | 339   |
| RVΔL-5tTA: 1 week | 21042902LJ | 1      | 4     |
| RVΔL-5tTA: 1 week | 21042902LJ | 2      | 11    |
| RVΔL-5tTA: 1 week | 21042902LJ | 3      | 14    |
| RVΔL-5tTA: 1 week | 21042902LJ | 4      | 4     |
| RVΔL-5tTA: 1 week | 21042902LJ | 5      | 39    |
| RVΔL-5tTA: 1 week | 21042902LJ | 6      | 108   |
| RVΔL-5tTA: 1 week | 21042902LJ | 7      | 213   |
| RVΔL-5tTA: 1 week | 21042902LJ | 8      | 255   |
| RVΔL-5tTA: 1 week | 21042902LJ | 9      | 296   |
| RVΔL-5tTA: 1 week | 21042902LJ | 10     | 219   |
| RVΔL-5tTA: 1 week | 21042902LJ | 11     | 134   |
| RVΔL-5tTA: 1 week | 21042902LJ | 12     | 64    |
| RVΔL-5tTA: 1 week | 21042902LJ | 13     | 29    |
| RVΔL-5tTA: 1 week | 21042902LJ | 14     | 14    |
| RVΔL-5tTA: 1 week | 21042902LJ | 15     | 7     |
| RVΔL-5tTA: 1 week | 21042902LJ | total: | 1411  |
| RVΔL-5tTA: 1 week | 21042903LJ | 2      | 3     |
| RVΔL-5tTA: 1 week | 21042903LJ | 3      | 7     |
| RVΔL-5tTA: 1 week | 21042903LJ | 4      | 6     |
| RVΔL-5tTA: 1 week | 21042903LJ | 5      | 4     |
| RVΔL-5tTA: 1 week | 21042903LJ | 6      | 27    |
| RVΔL-5tTA: 1 week | 21042903LJ | 7      | 40    |
| RVΔL-5tTA: 1 week | 21042903LJ | 8      | 81    |
| RVΔL-5tTA: 1 week | 21042903LJ | 9      | 115   |
| RVΔL-5tTA: 1 week | 21042903LJ | 10     | 165   |
| RVΔL-5tTA: 1 week | 21042903LJ | 11     | 120   |
| RVΔL-5tTA: 1 week | 21042903LJ | 12     | 84    |
| RVΔL-5tTA: 1 week | 21042903LJ | 13     | 67    |
| RVΔL-5tTA: 1 week | 21042903LJ | 14     | 44    |
| RVΔL-5tTA: 1 week | 21042903LJ | 15     | 33    |
| RVΔL-5tTA: 1 week | 21042903LJ | total: | 796   |
| RVΔL-5tTA: 1 week | 21060301LJ | 1      | 85    |
| RVΔL-5tTA: 1 week | 21060301LJ | 2      | 117   |
| RVΔL-5tTA: 1 week | 21060301LJ | 3      | 154   |
| RVΔL-5tTA: 1 week | 21060301LJ | 4      | 59    |
| RVΔL-5tTA: 1 week | 21060301LJ | 5      | 207   |
| RVΔL-5tTA: 1 week | 21060301LJ | 6      | 325   |
| RVΔL-5tTA: 1 week | 21060301LJ | 7      | 314   |
| RVΔL-5tTA: 1 week | 21060301LJ | 8      | 303   |
| RVΔL-5tTA: 1 week | 21060301LJ | 9      | 288   |

|                    |           |        |      |
|--------------------|-----------|--------|------|
| RVΔL-5tTA: 1 week  | 21060301J | 10     | 185  |
| RVΔL-5tTA: 1 week  | 21060301J | 11     | 141  |
| RVΔL-5tTA: 1 week  | 21060301J | 12     | 47   |
| RVΔL-5tTA: 1 week  | 21060301J | 13     | 19   |
| RVΔL-5tTA: 1 week  | 21060301J | 14     | 14   |
| RVΔL-5tTA: 1 week  | 21060301J | 15     | 13   |
| RVΔL-5tTA: 1 week  | 21060301J | total: | 2271 |
| RVΔL-5tTA: 4 weeks | 21042905J | 1      | 4    |
| RVΔL-5tTA: 4 weeks | 21042905J | 2      | 14   |
| RVΔL-5tTA: 4 weeks | 21042905J | 3      | 6    |
| RVΔL-5tTA: 4 weeks | 21042905J | 4      | 21   |
| RVΔL-5tTA: 4 weeks | 21042905J | 5      | 15   |
| RVΔL-5tTA: 4 weeks | 21042905J | 6      | 41   |
| RVΔL-5tTA: 4 weeks | 21042905J | 7      | 42   |
| RVΔL-5tTA: 4 weeks | 21042905J | 8      | 101  |
| RVΔL-5tTA: 4 weeks | 21042905J | 9      | 156  |
| RVΔL-5tTA: 4 weeks | 21042905J | 10     | 109  |
| RVΔL-5tTA: 4 weeks | 21042905J | 11     | 94   |
| RVΔL-5tTA: 4 weeks | 21042905J | 12     | 24   |
| RVΔL-5tTA: 4 weeks | 21042905J | 13     | 87   |
| RVΔL-5tTA: 4 weeks | 21042905J | 14     | 44   |
| RVΔL-5tTA: 4 weeks | 21042905J | 15     | 71   |
| RVΔL-5tTA: 4 weeks | 21042905J | total: | 829  |
| RVΔL-5tTA: 4 weeks | 21042906J | 1      | 9    |
| RVΔL-5tTA: 4 weeks | 21042906J | 2      | 17   |
| RVΔL-5tTA: 4 weeks | 21042906J | 3      | 28   |
| RVΔL-5tTA: 4 weeks | 21042906J | 4      | 23   |
| RVΔL-5tTA: 4 weeks | 21042906J | 5      | 24   |
| RVΔL-5tTA: 4 weeks | 21042906J | 6      | 25   |
| RVΔL-5tTA: 4 weeks | 21042906J | 7      | 93   |
| RVΔL-5tTA: 4 weeks | 21042906J | 8      | 200  |
| RVΔL-5tTA: 4 weeks | 21042906J | 9      | 305  |
| RVΔL-5tTA: 4 weeks | 21042906J | 10     | 233  |
| RVΔL-5tTA: 4 weeks | 21042906J | 11     | 200  |
| RVΔL-5tTA: 4 weeks | 21042906J | 12     | 141  |
| RVΔL-5tTA: 4 weeks | 21042906J | 13     | 74   |
| RVΔL-5tTA: 4 weeks | 21042906J | 14     | 108  |
| RVΔL-5tTA: 4 weeks | 21042906J | 15     | 94   |
| RVΔL-5tTA: 4 weeks | 21042906J | total: | 1574 |
| RVΔL-5tTA: 4 weeks | 21042907J | 2      | 2    |
| RVΔL-5tTA: 4 weeks | 21042907J | 4      | 3    |
| RVΔL-5tTA: 4 weeks | 21042907J | 5      | 5    |
| RVΔL-5tTA: 4 weeks | 21042907J | 6      | 24   |
| RVΔL-5tTA: 4 weeks | 21042907J | 7      | 32   |
| RVΔL-5tTA: 4 weeks | 21042907J | 8      | 51   |
| RVΔL-5tTA: 4 weeks | 21042907J | 9      | 100  |
| RVΔL-5tTA: 4 weeks | 21042907J | 10     | 74   |
| RVΔL-5tTA: 4 weeks | 21042907J | 11     | 69   |
| RVΔL-5tTA: 4 weeks | 21042907J | 12     | 54   |
| RVΔL-5tTA: 4 weeks | 21042907J | 13     | 26   |
| RVΔL-5tTA: 4 weeks | 21042907J | 14     | 31   |
| RVΔL-5tTA: 4 weeks | 21042907J | 15     | 28   |
| RVΔL-5tTA: 4 weeks | 21042907J | total: | 499  |
| RVΔL-5tTA: 4 weeks | 21042908J | 1      | 64   |
| RVΔL-5tTA: 4 weeks | 21042908J | 2      | 67   |

|                    |            |        |      |
|--------------------|------------|--------|------|
| RVΔL-5tTA: 4 weeks | 21042908LJ | 3      | 66   |
| RVΔL-5tTA: 4 weeks | 21042908LJ | 4      | 79   |
| RVΔL-5tTA: 4 weeks | 21042908LJ | 5      | 151  |
| RVΔL-5tTA: 4 weeks | 21042908LJ | 6      | 149  |
| RVΔL-5tTA: 4 weeks | 21042908LJ | 7      | 166  |
| RVΔL-5tTA: 4 weeks | 21042908LJ | 8      | 171  |
| RVΔL-5tTA: 4 weeks | 21042908LJ | 9      | 184  |
| RVΔL-5tTA: 4 weeks | 21042908LJ | 10     | 57   |
| RVΔL-5tTA: 4 weeks | 21042908LJ | 11     | 48   |
| RVΔL-5tTA: 4 weeks | 21042908LJ | 12     | 29   |
| RVΔL-5tTA: 4 weeks | 21042908LJ | 13     | 14   |
| RVΔL-5tTA: 4 weeks | 21042908LJ | 14     | 27   |
| RVΔL-5tTA: 4 weeks | 21042908LJ | 15     | 57   |
| RVΔL-5tTA: 4 weeks | 21042908LJ | total: | 1329 |

| Condition           | Mouse number | Cell counts |
|---------------------|--------------|-------------|
| RVΔGL-Flpo: 1 week  | 21021505LJ   | 22          |
| RVΔGL-Flpo: 1 week  | 21021506LJ   | 18          |
| RVΔGL-Flpo: 1 week  | 21021507LJ   | 121         |
| RVΔGL-Flpo: 1 week  | 21021508LJ   | 2           |
| RVΔGL-Flpo: 1 week  | 21052505LJ   | 7           |
| RVΔGL-Flpo: 1 week  | 21052506LJ   | 8           |
| RVΔGL-Flpo: 1 week  | 21052507LJ   | 98          |
| RVΔGL-Flpo: 1 week  | 21052508LJ   | 6           |
| RVΔGL-Flpo: 1 week  | Mean:        | 35.25       |
| RVΔL-Flpo: 1 week   | 21021805LJ   | 3093        |
| RVΔL-Flpo: 1 week   | 21021806LJ   | 320         |
| RVΔL-Flpo: 1 week   | 21021807LJ   | 311         |
| RVΔL-Flpo: 1 week   | 21021808LJ   | 263         |
| RVΔL-Flpo: 1 week   | 21052607LJ   | 47          |
| RVΔL-Flpo: 1 week   | 21052608LJ   | 2161        |
| RVΔL-Flpo: 1 week   | 21060302LJ   | 365         |
| RVΔL-Flpo: 1 week   | 21060303LJ   | 238         |
| RVΔL-Flpo: 1 week   | Mean:        | 849.75      |
| RVΔGL-Flpo: 4 weeks | 21021501LJ   | 80          |
| RVΔGL-Flpo: 4 weeks | 21021502LJ   | 62          |
| RVΔGL-Flpo: 4 weeks | 21021503LJ   | 3254        |
| RVΔGL-Flpo: 4 weeks | 21021504LJ   | 237         |
| RVΔGL-Flpo: 4 weeks | 21052501LJ   | 43          |
| RVΔGL-Flpo: 4 weeks | 21052502LJ   | 14          |
| RVΔGL-Flpo: 4 weeks | 21052503LJ   | 130         |
| RVΔGL-Flpo: 4 weeks | 21052504LJ   | 65          |
| RVΔGL-Flpo: 4 weeks | Mean:        | 485.625     |
| RVΔL-Flpo: 4 weeks  | 21021801LJ   | 4614        |
| RVΔL-Flpo: 4 weeks  | 21021802LJ   | 3006        |
| RVΔL-Flpo: 4 weeks  | 21021803LJ   | 1847        |
| RVΔL-Flpo: 4 weeks  | 21021804LJ   | 3331        |
| RVΔL-Flpo: 4 weeks  | 21052601LJ   | 1369        |
| RVΔL-Flpo: 4 weeks  | 21052602LJ   | 2919        |
| RVΔL-Flpo: 4 weeks  | 21052603LJ   | 3730        |
| RVΔL-Flpo: 4 weeks  | 21052606LJ   | 3454        |
| RVΔL-Flpo: 4 weeks  | Mean:        | 3033.75     |
| RVΔGL-Cre: 1 week   | 21021703LJ   | 13484       |
| RVΔGL-Cre: 1 week   | 21021704LJ   | 14635       |
| RVΔGL-Cre: 1 week   | 21021707LJ   | 10647       |
| RVΔGL-Cre: 1 week   | 21021708LJ   | 10845       |
| RVΔGL-Cre: 1 week   | Mean:        | 12402.75    |
| RVΔL-Cre: 1 week    | 21021905LJ   | 16907       |
| RVΔL-Cre: 1 week    | 21021906LJ   | 17923       |
| RVΔL-Cre: 1 week    | 21021907LJ   | 18751       |
| RVΔL-Cre: 1 week    | 21021908LJ   | 16257       |
| RVΔL-Cre: 1 week    | Mean:        | 17459.5     |
| RVΔGL-Cre: 4 weeks  | 21021701LJ   | 19156       |
| RVΔGL-Cre: 4 weeks  | 21021702LJ   | 17935       |
| RVΔGL-Cre: 4 weeks  | 21021705LJ   | 18539       |
| RVΔGL-Cre: 4 weeks  | 21021706LJ   | 17938       |
| RVΔGL-Cre: 4 weeks  | Mean:        | 18392       |
| RVΔL-Cre: 4 weeks   | 21021901LJ   | 21743       |
| RVΔL-Cre: 4 weeks   | 21021902LJ   | 24773       |
| RVΔL-Cre: 4 weeks   | 21021903LJ   | 23026       |
| RVΔL-Cre: 4 weeks   | 21021904LJ   | 22272       |
| RVΔL-Cre: 4 weeks   | Mean:        | 22953.5     |
| RVΔL-5tTA: 1 week   | 21042901LJ   | 339         |
| RVΔL-5tTA: 1 week   | 21042902LJ   | 1411        |
| RVΔL-5tTA: 1 week   | 21042903LJ   | 796         |
| RVΔL-5tTA: 1 week   | 21060301LJ   | 2271        |
| RVΔL-5tTA: 1 week   | Mean:        | 1204.25     |
| RVΔL-5tTA: 4 weeks  | 21042905LJ   | 829         |
| RVΔL-5tTA: 4 weeks  | 21042906LJ   | 1574        |
| RVΔL-5tTA: 4 weeks  | 21042907LJ   | 499         |
| RVΔL-5tTA: 4 weeks  | 21042908LJ   | 1329        |
| RVΔL-5tTA: 4 weeks  | Mean:        | 1057.75     |



| RVΔGL-Flpo 4 weeks | RVΔL-Flpo 4 weeks |
|--------------------|-------------------|
| 80                 | 4614              |
| 62                 | 3006              |
| 3254               | 1847              |
| 237                | 3331              |
| 43                 | 1369              |
| 14                 | 2919              |
| 130                | 3730              |
| 65                 | 3454              |

Anova: Single Factor

#### SUMMARY

| Groups             | Count | Sum   | Average | Variance   |
|--------------------|-------|-------|---------|------------|
| RVΔGL-Flpo 4 weeks | 8     | 3885  | 485.625 | 1255920.84 |
| RVΔL-Flpo 4 weeks  | 8     | 24270 | 3033.75 | 1062946.79 |

#### ANOVA

| Source of Variation | SS          | df | MS         | F          | P-value    | F crit     |
|---------------------|-------------|----|------------|------------|------------|------------|
| Between Groups      | 25971764.06 | 1  | 25971764.1 | 22.4003852 | 0.00032063 | 4.60010994 |
| Within Groups       | 16232073.38 | 14 | 1159433.81 |            |            |            |
| Total               | 42203837.44 | 15 |            |            |            |            |

| RVΔGL-Flpo 1 week | RVΔGL-Flpo 4 weeks |
|-------------------|--------------------|
| 22                | 80                 |
| 18                | 62                 |
| 121               | 3254               |
| 2                 | 237                |
| 7                 | 43                 |
| 8                 | 14                 |
| 98                | 130                |
| 6                 | 65                 |

Anova: Single Factor

#### SUMMARY

| Groups             | Count | Sum  | Average | Variance   |
|--------------------|-------|------|---------|------------|
| RVΔGL-Flpo 1 week  | 8     | 282  | 35.25   | 2180.78571 |
| RVΔGL-Flpo 4 weeks | 8     | 3885 | 485.625 | 1255920.84 |

#### ANOVA

| Source of Variation | SS          | df | MS         | F          | P-value    | F crit     |
|---------------------|-------------|----|------------|------------|------------|------------|
| Between Groups      | 811350.5625 | 1  | 811350.563 | 1.28980131 | 0.27515341 | 4.60010994 |
| Within Groups       | 8806711.375 | 14 | 629050.813 |            |            |            |
| Total               | 9618061.938 | 15 |            |            |            |            |

| RVΔGL-Flpo 4 weeks | RVΔL-Flpo 1 week |
|--------------------|------------------|
| 80                 | 3093             |
| 62                 | 320              |
| 3254               | 311              |
| 237                | 263              |

Anova: Single Factor

SUMMARY

| Groups             | Count | Sum  | Average | Variance   |
|--------------------|-------|------|---------|------------|
| RVΔGL-Flpo 4 weeks | 4     | 3633 | 908.25  | 2451752.25 |
| RVΔL-Flpo 1 week   | 4     | 3987 | 996.75  | 1953632.25 |

ANOVA

| Source of Variation | SS         | df | MS         | F          | P-value    | F crit     |
|---------------------|------------|----|------------|------------|------------|------------|
| Between Groups      | 15664.5    | 1  | 15664.5    | 0.00711152 | 0.93553752 | 5.98737761 |
| Within Groups       | 13216153.5 | 6  | 2202692.25 |            |            |            |
| Total               | 13231818   | 7  |            |            |            |            |

| RVΔL-Flpo 4 weeks | RVΔGL-Flpo 1 week |
|-------------------|-------------------|
| 4614              | 22                |
| 3006              | 18                |
| 1847              | 121               |
| 3331              | 2                 |

Anova: Single Factor

SUMMARY

| Groups            | Count | Sum   | Average | Variance   |
|-------------------|-------|-------|---------|------------|
| RVΔL-Flpo 4 weeks | 4     | 12798 | 3199.5  | 1294933.67 |
| RVΔGL-Flpo 1 week | 4     | 163   | 40.75   | 2936.91667 |

ANOVA

| Source of Variation | SS          | df | MS         | F          | P-value    | F crit     |
|---------------------|-------------|----|------------|------------|------------|------------|
| Between Groups      | 19955403.13 | 1  | 19955403.1 | 30.7509907 | 0.00145233 | 5.98737761 |
| Within Groups       | 3893611.75  | 6  | 648935.292 |            |            |            |
| Total               | 23849014.88 | 7  |            |            |            |            |

| RVΔL-Flpo 1 week | RVΔL-Flpo 4 weeks |
|------------------|-------------------|
| 3093             | 4614              |
| 320              | 3006              |
| 311              | 1847              |
| 263              | 3331              |
| 47               | 1369              |
| 2161             | 2919              |
| 365              | 3730              |
| 238              | 3454              |

Anova: Single Factor

SUMMARY

| <i>Groups</i>     | <i>Count</i> | <i>Sum</i> | <i>Average</i> | <i>Variance</i> |
|-------------------|--------------|------------|----------------|-----------------|
| RVΔL-Flpo 1 week  | 8            | 6798       | 849.75         | 1274333.93      |
| RVΔL-Flpo 4 weeks | 8            | 24270      | 3033.75        | 1062946.79      |

ANOVA

| <i>Source of Variation</i> | <i>SS</i> | <i>df</i> | <i>MS</i>  | <i>F</i>   | <i>P-value</i> | <i>F crit</i> |
|----------------------------|-----------|-----------|------------|------------|----------------|---------------|
| Between Groups             | 19079424  | 1         | 19079424   | 16.3261724 | 0.00121549     | 4.60010994    |
| Within Groups              | 16360965  | 14        | 1168640.36 |            |                |               |
| Total                      | 35440389  | 15        |            |            |                |               |

| RVΔGL-Flpo 1 week | RVΔL-Flpo 1 week |
|-------------------|------------------|
| 22                | 3093             |
| 18                | 320              |
| 121               | 311              |
| 2                 | 263              |
| 7                 | 47               |
| 8                 | 2161             |
| 98                | 365              |
| 6                 | 238              |

Anova: Single Factor

SUMMARY

| <i>Groups</i>     | <i>Count</i> | <i>Sum</i> | <i>Average</i> | <i>Variance</i> |
|-------------------|--------------|------------|----------------|-----------------|
| RVΔGL-Flpo 1 week | 8            | 282        | 35.25          | 2180.78571      |
| RVΔL-Flpo 1 week  | 8            | 6798       | 849.75         | 1274333.93      |

ANOVA

| <i>Source of Variation</i> | <i>SS</i> | <i>df</i> | <i>MS</i>  | <i>F</i>  | <i>P-value</i> | <i>F crit</i> |
|----------------------------|-----------|-----------|------------|-----------|----------------|---------------|
| Between Groups             | 2653641   | 1         | 2653641    | 4.1576348 | 0.06079134     | 4.60010994    |
| Within Groups              | 8935603   | 14        | 638257.357 |           |                |               |
| Total                      | 11589244  | 15        |            |           |                |               |

| RVΔGL-Cre 4 weeks | RVΔL-Cre 4 weeks |
|-------------------|------------------|
| 19156             | 21743            |
| 17935             | 24773            |
| 18539             | 23026            |
| 17938             | 22272            |

Anova: Single Factor

SUMMARY

| <i>Groups</i>     | <i>Count</i> | <i>Sum</i> | <i>Average</i> | <i>Variance</i> |
|-------------------|--------------|------------|----------------|-----------------|
| RVΔGL-Cre 4 weeks | 4            | 73568      | 18392          | 340090          |
| RVΔL-Cre 4 weeks  | 4            | 91814      | 22953.5        | 1748529.67      |

ANOVA

| Source of Variation | SS         | df | MS         | F          | P-value    | F crit     |
|---------------------|------------|----|------------|------------|------------|------------|
| Between Groups      | 41614564.5 | 1  | 41614564.5 | 39.8488678 | 0.00073769 | 5.98737761 |
| Within Groups       | 6265859    | 6  | 1044309.83 |            |            |            |
| Total               | 47880423.5 | 7  |            |            |            |            |

RVΔGL-Cre 4 weeks    RVΔGL-Cre 1 week

|       |       |
|-------|-------|
| 19156 | 13484 |
| 17935 | 14635 |
| 18539 | 10647 |
| 17938 | 10845 |

Anova: Single Factor

SUMMARY

| Groups            | Count | Sum   | Average  | Variance   |
|-------------------|-------|-------|----------|------------|
| RVΔGL-Cre 4 weeks | 4     | 73568 | 18392    | 340090     |
| RVΔGL-Cre 1 week  | 4     | 49611 | 12402.75 | 3887094.92 |

ANOVA

| Source of Variation | SS          | df | MS         | F         | P-value    | F crit     |
|---------------------|-------------|----|------------|-----------|------------|------------|
| Between Groups      | 71742231.13 | 1  | 71742231.1 | 33.943266 | 0.00112486 | 5.98737761 |
| Within Groups       | 12681554.75 | 6  | 2113592.46 |           |            |            |
| Total               | 84423785.88 | 7  |            |           |            |            |

RVΔGL-Cre 4 weeks    RVΔL-Cre 1 week

|       |       |
|-------|-------|
| 19156 | 16907 |
| 17935 | 17923 |
| 18539 | 18751 |
| 17938 | 16257 |

Anova: Single Factor

SUMMARY

| Groups            | Count | Sum   | Average | Variance   |
|-------------------|-------|-------|---------|------------|
| RVΔGL-Cre 4 weeks | 4     | 73568 | 18392   | 340090     |
| RVΔL-Cre 1 week   | 4     | 69838 | 17459.5 | 1211355.67 |

ANOVA

| Source of Variation | SS        | df | MS         | F          | P-value   | F crit     |
|---------------------|-----------|----|------------|------------|-----------|------------|
| Between Groups      | 1739112.5 | 1  | 1739112.5  | 2.24192511 | 0.1849584 | 5.98737761 |
| Within Groups       | 4654337   | 6  | 775722.833 |            |           |            |
| Total               | 6393449.5 | 7  |            |            |           |            |

| RVΔL-Cre 4 weeks | RVΔGL-Cre 1 week |
|------------------|------------------|
| 21743            | 13484            |
| 24773            | 14635            |
| 23026            | 10647            |
| 22272            | 10845            |

Anova: Single Factor

SUMMARY

| <i>Groups</i>    | <i>Count</i> | <i>Sum</i> | <i>Average</i> | <i>Variance</i> |
|------------------|--------------|------------|----------------|-----------------|
| RVΔL-Cre 4 weeks | 4            | 91814      | 22953.5        | 1748529.67      |
| RVΔGL-Cre 1 week | 4            | 49611      | 12402.75       | 3887094.92      |

ANOVA

| <i>Source of Variation</i> | <i>SS</i>   | <i>df</i> | <i>MS</i>  | <i>F</i>  | <i>P-value</i> | <i>F crit</i> |
|----------------------------|-------------|-----------|------------|-----------|----------------|---------------|
| Between Groups             | 222636651.1 | 1         | 222636651  | 79.010462 | 0.00011291     | 5.98737761    |
| Within Groups              | 16906873.75 | 6         | 2817812.29 |           |                |               |
| Total                      | 239543524.9 | 7         |            |           |                |               |

| RVΔL-Cre 4 weeks | RVΔL-Cre 1 week |
|------------------|-----------------|
| 21743            | 16907           |
| 24773            | 17923           |
| 23026            | 18751           |
| 22272            | 16257           |

Anova: Single Factor

SUMMARY

| <i>Groups</i>    | <i>Count</i> | <i>Sum</i> | <i>Average</i> | <i>Variance</i> |
|------------------|--------------|------------|----------------|-----------------|
| RVΔL-Cre 4 weeks | 4            | 91814      | 22953.5        | 1748529.67      |
| RVΔL-Cre 1 week  | 4            | 69838      | 17459.5        | 1211355.67      |

ANOVA

| <i>Source of Variation</i> | <i>SS</i> | <i>df</i> | <i>MS</i>  | <i>F</i>  | <i>P-value</i> | <i>F crit</i> |
|----------------------------|-----------|-----------|------------|-----------|----------------|---------------|
| Between Groups             | 60368072  | 1         | 60368072   | 40.790818 | 0.00069327     | 5.98737761    |
| Within Groups              | 8879656   | 6         | 1479942.67 |           |                |               |
| Total                      | 69247728  | 7         |            |           |                |               |

| RVΔGL-Cre 1 week | RVΔL-Cre 1 week |
|------------------|-----------------|
| 13484            | 16907           |
| 14635            | 17923           |
| 10647            | 18751           |
| 10845            | 16257           |

Anova: Single Factor

SUMMARY

| <i>Groups</i>    | <i>Count</i> | <i>Sum</i> | <i>Average</i> | <i>Variance</i> |
|------------------|--------------|------------|----------------|-----------------|
| RVΔGL-Cre 1 week | 4            | 49611      | 12402.75       | 3887094.92      |
| RVΔL-Cre 1 week  | 4            | 69838      | 17459.5        | 1211355.67      |

ANOVA

| <i>Source of Variation</i> | <i>SS</i>   | <i>df</i> | <i>MS</i>  | <i>F</i>  | <i>P-value</i> | <i>F crit</i> |
|----------------------------|-------------|-----------|------------|-----------|----------------|---------------|
| Between Groups             | 51141441.13 | 1         | 51141441.1 | 20.061562 | 0.00419681     | 5.98737761    |
| Within Groups              | 15295351.75 | 6         | 2549225.29 |           |                |               |
| Total                      | 66436792.88 | 7         |            |           |                |               |

| RVΔL-5tTA 1 week | RVΔL-5tTA 4 weeks |
|------------------|-------------------|
| 339              | 829               |
| 1411             | 1574              |
| 796              | 499               |
| 2271             | 1329              |

Anova: Single Factor

SUMMARY

| <i>Groups</i>     | <i>Count</i> | <i>Sum</i> | <i>Average</i> | <i>Variance</i> |
|-------------------|--------------|------------|----------------|-----------------|
| RVΔL-5tTA 1 week  | 4            | 4817       | 1204.25        | 698675.583      |
| RVΔL-5tTA 4 weeks | 4            | 4231       | 1057.75        | 234872.917      |

ANOVA

| <i>Source of Variation</i> | <i>SS</i> | <i>df</i> | <i>MS</i> | <i>F</i>   | <i>P-value</i> | <i>F crit</i> |
|----------------------------|-----------|-----------|-----------|------------|----------------|---------------|
| Between Groups             | 42924.5   | 1         | 42924.5   | 0.09195987 | 0.77193993     | 5.98737761    |
| Within Groups              | 2800645.5 | 6         | 466774.25 |            |                |               |
| Total                      | 2843570   | 7         |           |            |                |               |

| Comparison                              | p-value            |
|-----------------------------------------|--------------------|
| RVΔGL-Flpo 4 weeks vs RVΔL-Flpo 4 weeks | <b>0.000320625</b> |
| RVΔGL-Flpo 4 weeks vs RVΔGL-Flpo 1 week | 0.27515341         |
| RVΔGL-Flpo 4 weeks vs RVΔL-Flpo 1 week  | 0.93553752         |
| RVΔL-Flpo 4 weeks vs RVΔGL-Flpo 1 week  | <b>0.001452333</b> |
| RVΔL-Flpo 4 weeks vs RVΔL-Flpo 1 week   | <b>0.001215493</b> |
| RVΔGL-Flpo 1 week vs RVΔL-Flpo 1 week   | 0.060791343        |
| RVΔGL-Cre 4 weeks vs RVΔL-Cre 4 weeks   | <b>0.000737695</b> |
| RVΔGL-Cre 4 weeks vs RVΔGL-Cre 1 week   | <b>0.001124862</b> |
| RVΔGL-Cre 4 weeks vs RVΔL-Cre 1 weeks   | 0.184958403        |
| RVΔL-Cre 4 weeks vs RVΔGL-Cre 1 week    | <b>0.000112909</b> |
| RVΔL-Cre 4 weeks vs RVΔL-Cre 1 week     | <b>0.000693266</b> |
| RVΔGL-Cre 1 week vs RVΔL-Cre 1 week     | <b>0.004196815</b> |
| RVΔL-5tTA 1 week vs RVΔL-5tTA 4 weeks   | 0.77193993         |

812 **Video S1. RV $\Delta$ L-Cre-labeled cortical neurons at 2 weeks vs 10 weeks postinjection, Related to**  
813 **Figure 3**  
814 3-dimensional rendering of the same cortical volume shown in Figure 3, panel B.  
815  
816 *See external file.*  
817  
818



819 **File S3. Cell counts and statistics for structural two-photon imaging experiments, Related to Figure**  
820 **3**  
821  
822 *See following pages.*  
823  
824

| RVΔGL-Cre: cell counts | Animal-1 FOV-1 | Animal-1 FOV-2 | Animal-2 FOV-1 | Animal-2 FOV-2 | Animal-3 FOV-1 | Animal-3 FOV-2 | Animal-4 FOV-1 | Animal-4 FOV-2 |
|------------------------|----------------|----------------|----------------|----------------|----------------|----------------|----------------|----------------|
| Week-1                 | 300            | 315            | 219            | 318            | 435            | 288            | 203            | 220            |
| Week-2                 | 519            | 359            | 269            | 546            | 488            | 364            | 321            | 354            |
| Week-3                 | 537            | 390            | 305            | 569            | 505            | 443            | 369            | 427            |
| Week-4                 | 538            | 403            | 317            | 572            | 518            | 445            | 372            | 426            |
| Week-6                 | 537            | 403            | 319            | 571            | 515            | 451            | 370            | 424            |
| Week-12                | 535            | 400            | 319            | 567            | 514            | 443            | 369            | 424            |
| Week-14                |                |                | 319            | 567            | 513            | 442            | 368            | 421            |
| Week-16                |                |                | 319            |                |                |                |                |                |

  

| RVΔGL-Cre: percentage to week-1 | Animal-1 FOV-1 | Animal-1 FOV-2 | Animal-2 FOV-1 | Animal-2 FOV-2 | Animal-3 FOV-1 | Animal-3 FOV-2 | Animal-4 FOV-1 | Animal-4 FOV-2 |
|---------------------------------|----------------|----------------|----------------|----------------|----------------|----------------|----------------|----------------|
| Week-1                          | 1.00           | 1.00           | 1.00           | 1.00           | 1.00           | 1.00           | 1.00           | 1.00           |
| Week-2                          | 1.73           | 1.14           | 1.23           | 1.72           | 1.12           | 1.26           | 1.58           | 1.61           |
| Week-3                          | 1.79           | 1.24           | 1.39           | 1.79           | 1.16           | 1.54           | 1.82           | 1.94           |
| Week-4                          | 1.79           | 1.28           | 1.45           | 1.80           | 1.19           | 1.55           | 1.83           | 1.94           |
| Week-6                          | 1.79           | 1.28           | 1.46           | 1.80           | 1.18           | 1.57           | 1.82           | 1.93           |
| Week-12                         | 1.78           | 1.27           | 1.46           | 1.78           | 1.18           | 1.54           | 1.82           | 1.93           |
| Week-14                         |                |                | 1.46           | 1.78           | 1.18           | 1.53           | 1.81           | 1.91           |
| Week-16                         |                |                | 1.46           |                |                |                |                |                |

  

| RVΔGL-Cre: comparison between week-1 and week-4 | Animal-1 FOV-1 | Animal-1 FOV-2 | Animal-2 FOV-1 | Animal-2 FOV-2 | Animal-3 FOV-1 | Animal-3 FOV-2 | Animal-4 FOV-1 | Animal-4 FOV-2 |
|-------------------------------------------------|----------------|----------------|----------------|----------------|----------------|----------------|----------------|----------------|
| Week-1                                          | 300            | 315            | 219            | 318            | 435            | 288            | 203            | 220            |
| Week-4                                          | 538            | 403            | 317            | 572            | 518            | 445            | 372            | 426            |
| Increase (Week-4 - Week-1)                      | 238            | 88             | 98             | 254            | 83             | 157            | 169            | 206            |
| % increase (Week-4 - Week-1)                    | 79.33%         | 27.94%         | 44.75%         | 79.87%         | 19.08%         | 54.51%         | 83.25%         | 93.64%         |
| Increase (Week-12 - Week-4)                     | -3             | -3             | 2              | -5             | -4             | -2             | -3             | -2             |
| % increase (Week-12 - Week-4)                   | -0.56%         | -0.74%         | 0.63%          | -0.87%         | -0.77%         | -0.45%         | -0.81%         | -0.47%         |

| t-Test: Paired Two Sample for Means |        |                    |
|-------------------------------------|--------|--------------------|
|                                     | Week-1 | Week-4             |
| Mean                                | 287.25 | 448.875            |
| Variance                            | 5712.5 | 7689.267857        |
| Observations                        | 8      | 8                  |
| Pearson Correlation                 |        | 0.665513457        |
| Hypothesized Mean Difference        |        | 0                  |
| df                                  |        | 7                  |
| t Stat                              |        | -6.75473154        |
| P(T<=t) one-tail                    |        | <b>0.000131934</b> |
| t Critical one-tail                 |        | 1.894578605        |
| P(T<=t) two-tail                    |        | 0.000263868        |
| t Critical two-tail                 |        | 2.364624252        |

| t-Test: Paired Two Sample for Means |             |                    |
|-------------------------------------|-------------|--------------------|
|                                     | Week-4      | Week-12            |
| Mean                                | 448.875     | 446.375            |
| Variance                            | 7689.267857 | 7407.410714        |
| Observations                        | 8           | 8                  |
| Pearson Correlation                 |             | 0.99890399         |
| Hypothesized Mean Difference        |             | 0                  |
| df                                  |             | 7                  |
| t Stat                              |             | 3.415650255        |
| P(T<=t) one-tail                    |             | <b>0.005600716</b> |
| t Critical one-tail                 |             | 1.894578605        |
| P(T<=t) two-tail                    |             | 0.011201433        |
| t Critical two-tail                 |             | 2.364624252        |

| % increase from 1 week to 4 weeks: |        |        |        |        |        |        |        |        |
|------------------------------------|--------|--------|--------|--------|--------|--------|--------|--------|
| RVΔGL-Cre                          | 79.33% | 27.94% | 44.75% | 79.87% | 19.08% | 54.51% | 83.25% | 93.64% |
| RVΔL-Cre                           | 84.38% | 84.41% | 49.57% | 70.25% | 54.88% | 67.66% | 40.66% | 93.26% |

| Unpaired t test                        |                   |
|----------------------------------------|-------------------|
| Table Analyzed                         | % increase        |
| P value                                | <b>0.5187</b>     |
| P value summary                        | ns                |
| Significantly different (P < 0.05)?    | No                |
| One- or two-tailed P value?            | Two-tailed        |
| t, df                                  | t=0.6621, df=14   |
| <b>How big is the difference?</b>      |                   |
| Mean of RVΔGL-Cre                      | 0.603             |
| Mean of RVΔL-Cre                       | 0.6813            |
| Difference between means (B - A) ± SEM | 0.07836 ± 0.1184  |
| 95% confidence interval                | -0.1755 to 0.3322 |
| R squared (eta squared)                | 0.03036           |
| <b>F test to compare variances</b>     |                   |
| F, DFn, Dfd                            | 2.216, 7, 7       |
| P value                                | 0.3158            |
| P value summary                        | ns                |
| Significantly different (P < 0.05)?    | No                |
| <b>Data analyzed</b>                   |                   |
| Sample size, RVΔGL-Cre                 | 8                 |
| Sample size, RVΔL-Cre                  | 8                 |

| % increase from 4 weeks to 12 weeks: |        |        |       |        |        |        |        |        |
|--------------------------------------|--------|--------|-------|--------|--------|--------|--------|--------|
| RVΔGL-Cre                            | -0.56% | -0.74% | 0.63% | -0.87% | -0.77% | -0.45% | -0.81% | -0.47% |
| RVΔL-Cre                             | 0.48%  | -0.29% | 2.31% | -1.46% | 3.30%  | 0.00%  | 0.78%  | 0.58%  |

| Unpaired t test                        |                     |
|----------------------------------------|---------------------|
| P value                                | <b>0.0451</b>       |
| P value summary                        | *                   |
| Significantly different (P < 0.05)?    | Yes                 |
| One- or two-tailed P value?            | Two-tailed          |
| t, df                                  | t=2.199, df=14      |
| <b>How big is the difference?</b>      |                     |
| Mean of RVΔGL-Cre                      | -0.005054           |
| Mean of RVΔL-Cre                       | 0.007135            |
| Difference between means (B - A) ± SEM | .01219 ± 0.005542   |
| 95% confidence interval                | 0.003030 to 0.02407 |
| R squared (eta squared)                | 0.2568              |
| <b>F test to compare variances</b>     |                     |
| F, DFn, Dfd                            | 9.402, 7, 7         |
| P value                                | 0.0085              |
| P value summary                        | **                  |
| Significantly different (P < 0.05)?    | Yes                 |
| <b>Data analyzed</b>                   |                     |
| Sample size, RVΔGL-Cre                 | 8                   |
| Sample size, RVΔL-Cre                  | 8                   |

| RVΔL-Cre: cell counts | Animal-1 FOV-1 | Animal-1 FOV-2 | Animal-2 FOV-1 | Animal-2 FOV-2 | Animal-3 FOV-1 | Animal-3 FOV-2 | Animal-4 FOV-1 | Animal-4 FOV-2 |
|-----------------------|----------------|----------------|----------------|----------------|----------------|----------------|----------------|----------------|
| Week-1                | 224            | 186            | 232            | 242            | 215            | 167            | 182            | 178            |
| Week-2                | 331            | 307            | 300            | 298            | 270            | 237            | 200            | 228            |
| Week-3                | 396            | 340            | 341            | 378            | 289            | 279            | 253            | 304            |
| Week-4                | 413            | 343            | 347            | 412            | 333            | 280            | 256            | 344            |
| Week-6                | 409            | 342            | 347            | 413            | 342            | 283            | 255            | 345            |
| Week-12               | 415            | 342            | 355            | 406            | 344            | 280            | 258            | 346            |
| Week-14               | 415            | 342            | 354            | 406            | 344            | 280            |                |                |
| Week-16               |                |                |                | 406            | 344            | 280            |                |                |

| RVΔL-Cre: percentage to week-1 | Animal-1 FOV-1 | Animal-1 FOV-2 | Animal-2 FOV-1 | Animal-2 FOV-2 | Animal-3 FOV-1 | Animal-3 FOV-2 | Animal-4 FOV-1 | Animal-4 FOV-2 |
|--------------------------------|----------------|----------------|----------------|----------------|----------------|----------------|----------------|----------------|
| Week-1                         | 1.00           | 1.00           | 1.00           | 1.00           | 1.00           | 1.00           | 1.00           | 1.00           |
| Week-2                         | 1.48           | 1.65           | 1.29           | 1.23           | 1.26           | 1.42           | 1.10           | 1.28           |
| Week-3                         | 1.77           | 1.83           | 1.47           | 1.56           | 1.34           | 1.67           | 1.39           | 1.71           |
| Week-4                         | 1.84           | 1.84           | 1.50           | 1.70           | 1.55           | 1.68           | 1.41           | 1.93           |
| Week-6                         | 1.83           | 1.84           | 1.50           | 1.71           | 1.59           | 1.69           | 1.40           | 1.94           |
| Week-12                        | 1.85           | 1.84           | 1.53           | 1.68           | 1.60           | 1.68           | 1.42           | 1.94           |
| Week-14                        | 1.85           | 1.84           | 1.53           | 1.68           | 1.60           | 1.68           |                |                |
| Week-16                        |                |                |                | 1.68           | 1.60           | 1.68           |                |                |

| RVΔL-Cre: comparison between week-1 and week-4 | Animal-1 FOV-1 | Animal-1 FOV-2 | Animal-2 FOV-1 | Animal-2 FOV-2 | Animal-3 FOV-1 | Animal-3 FOV-2 | Animal-4 FOV-1 | Animal-4 FOV-2 |
|------------------------------------------------|----------------|----------------|----------------|----------------|----------------|----------------|----------------|----------------|
| Week-1                                         | 224            | 186            | 232            | 242            | 215            | 167            | 182            | 178            |
| Week-4                                         | 413            | 343            | 347            | 412            | 333            | 280            | 256            | 344            |
| Increase (Week-4 - Week-1)                     | 189            | 157            | 115            | 170            | 118            | 113            | 74             | 166            |
| % increase (Week-4 - Week-1)                   | 84.38%         | 84.41%         | 49.57%         | 70.25%         | 54.88%         | 67.66%         | 40.66%         | 93.26%         |
| Increase (Week-12 - Week-4)                    | 2              | -1             | 8              | -6             | 11             | 0              | 2              | 2              |
| % increase (Week-12 - Week-4)                  | 0.48%          | -0.29%         | 2.31%          | -1.46%         | 3.30%          | 0.00%          | 0.78%          | 0.58%          |

| t-Test: Paired Two Sample for Means |              |             |
|-------------------------------------|--------------|-------------|
|                                     | Week-1       | Week-4      |
| Mean                                | 203.25       | 341         |
| Variance                            | 799.6428571  | 3040.571429 |
| Observations                        | 8            | 8           |
| Pearson Correlation                 | 0.754099973  |             |
| Hypothesized Mean Difference        | 0            |             |
| df                                  | 7            |             |
| t Stat                              | -10.09862351 |             |
| P(T<=t) one-tail                    | 1.00266E-05  |             |
| t Critical one-tail                 | 1.894578605  |             |
| P(T<=t) two-tail                    | 2.00531E-05  |             |
| t Critical two-tail                 | 2.364624252  |             |

| t-Test: Paired Two Sample for Means |              |             |
|-------------------------------------|--------------|-------------|
|                                     | Week-4       | Week-12     |
| Mean                                | 341          | 343.25      |
| Variance                            | 3040.571429  | 2928.785714 |
| Observations                        | 8            | 8           |
| Pearson Correlation                 | 0.995543784  |             |
| Hypothesized Mean Difference        | 0            |             |
| df                                  | 7            |             |
| t Stat                              | -1.210419877 |             |
| P(T<=t) one-tail                    | 0.13269902   |             |
| t Critical one-tail                 | 1.894578605  |             |
| P(T<=t) two-tail                    | 0.265398039  |             |
| t Critical two-tail                 | 2.364624252  |             |

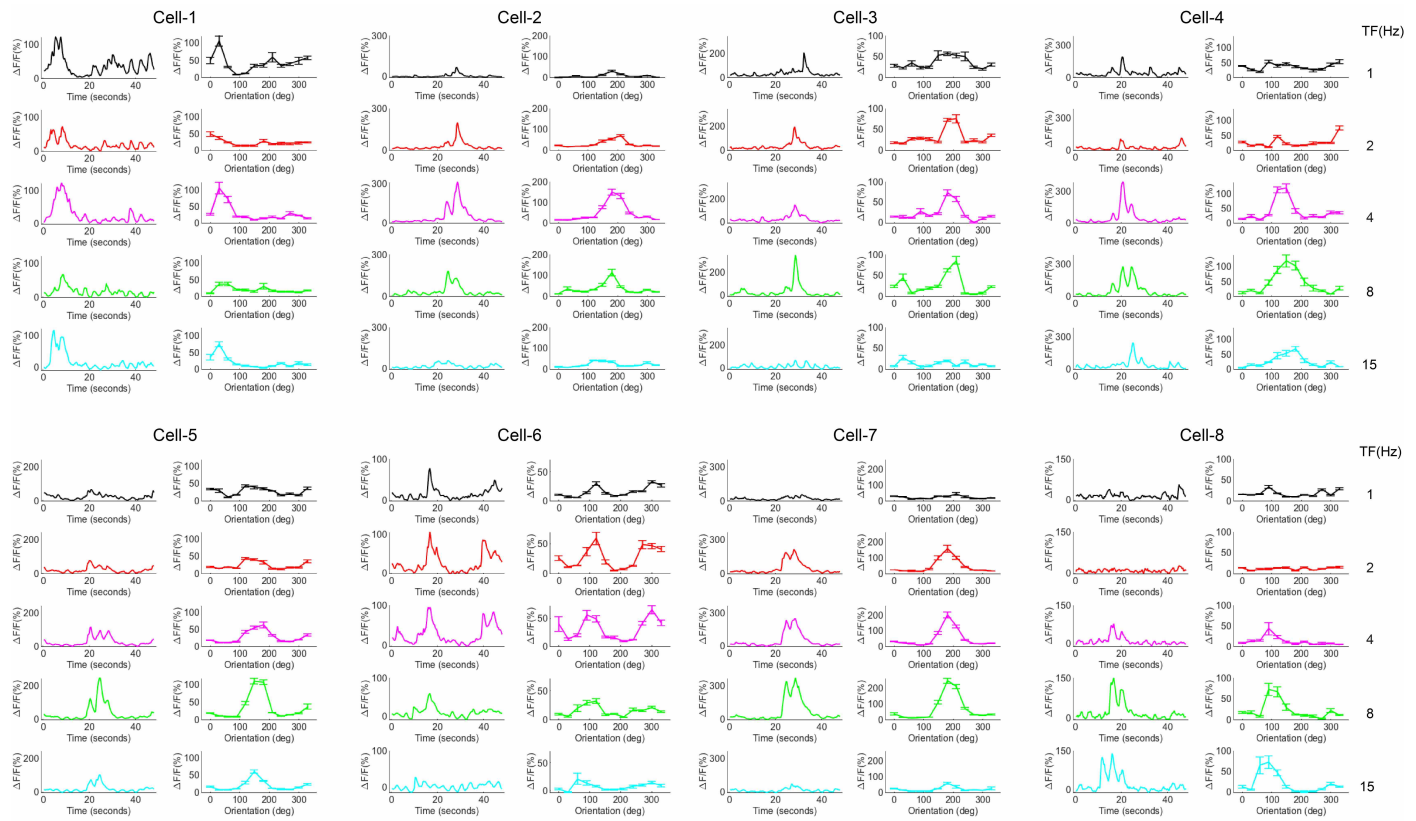

825  
826  
827  
828  
829  
830  
831  
832

**Figure S4. GCaMP6s signals and tuning curves of 8 example V1 neurons at 16 weeks postinjection, Related to Figure 4**

These data were obtained with drifting gratings presented at 12 directions of motion and 5 temporal frequencies, repeated 10 times (tuning curve: mean  $\Delta F/F \pm$  s.e.m; GCaMP6s signals: mean  $\Delta F/F$ ) at two different FOVs at the 16-week timepoint.

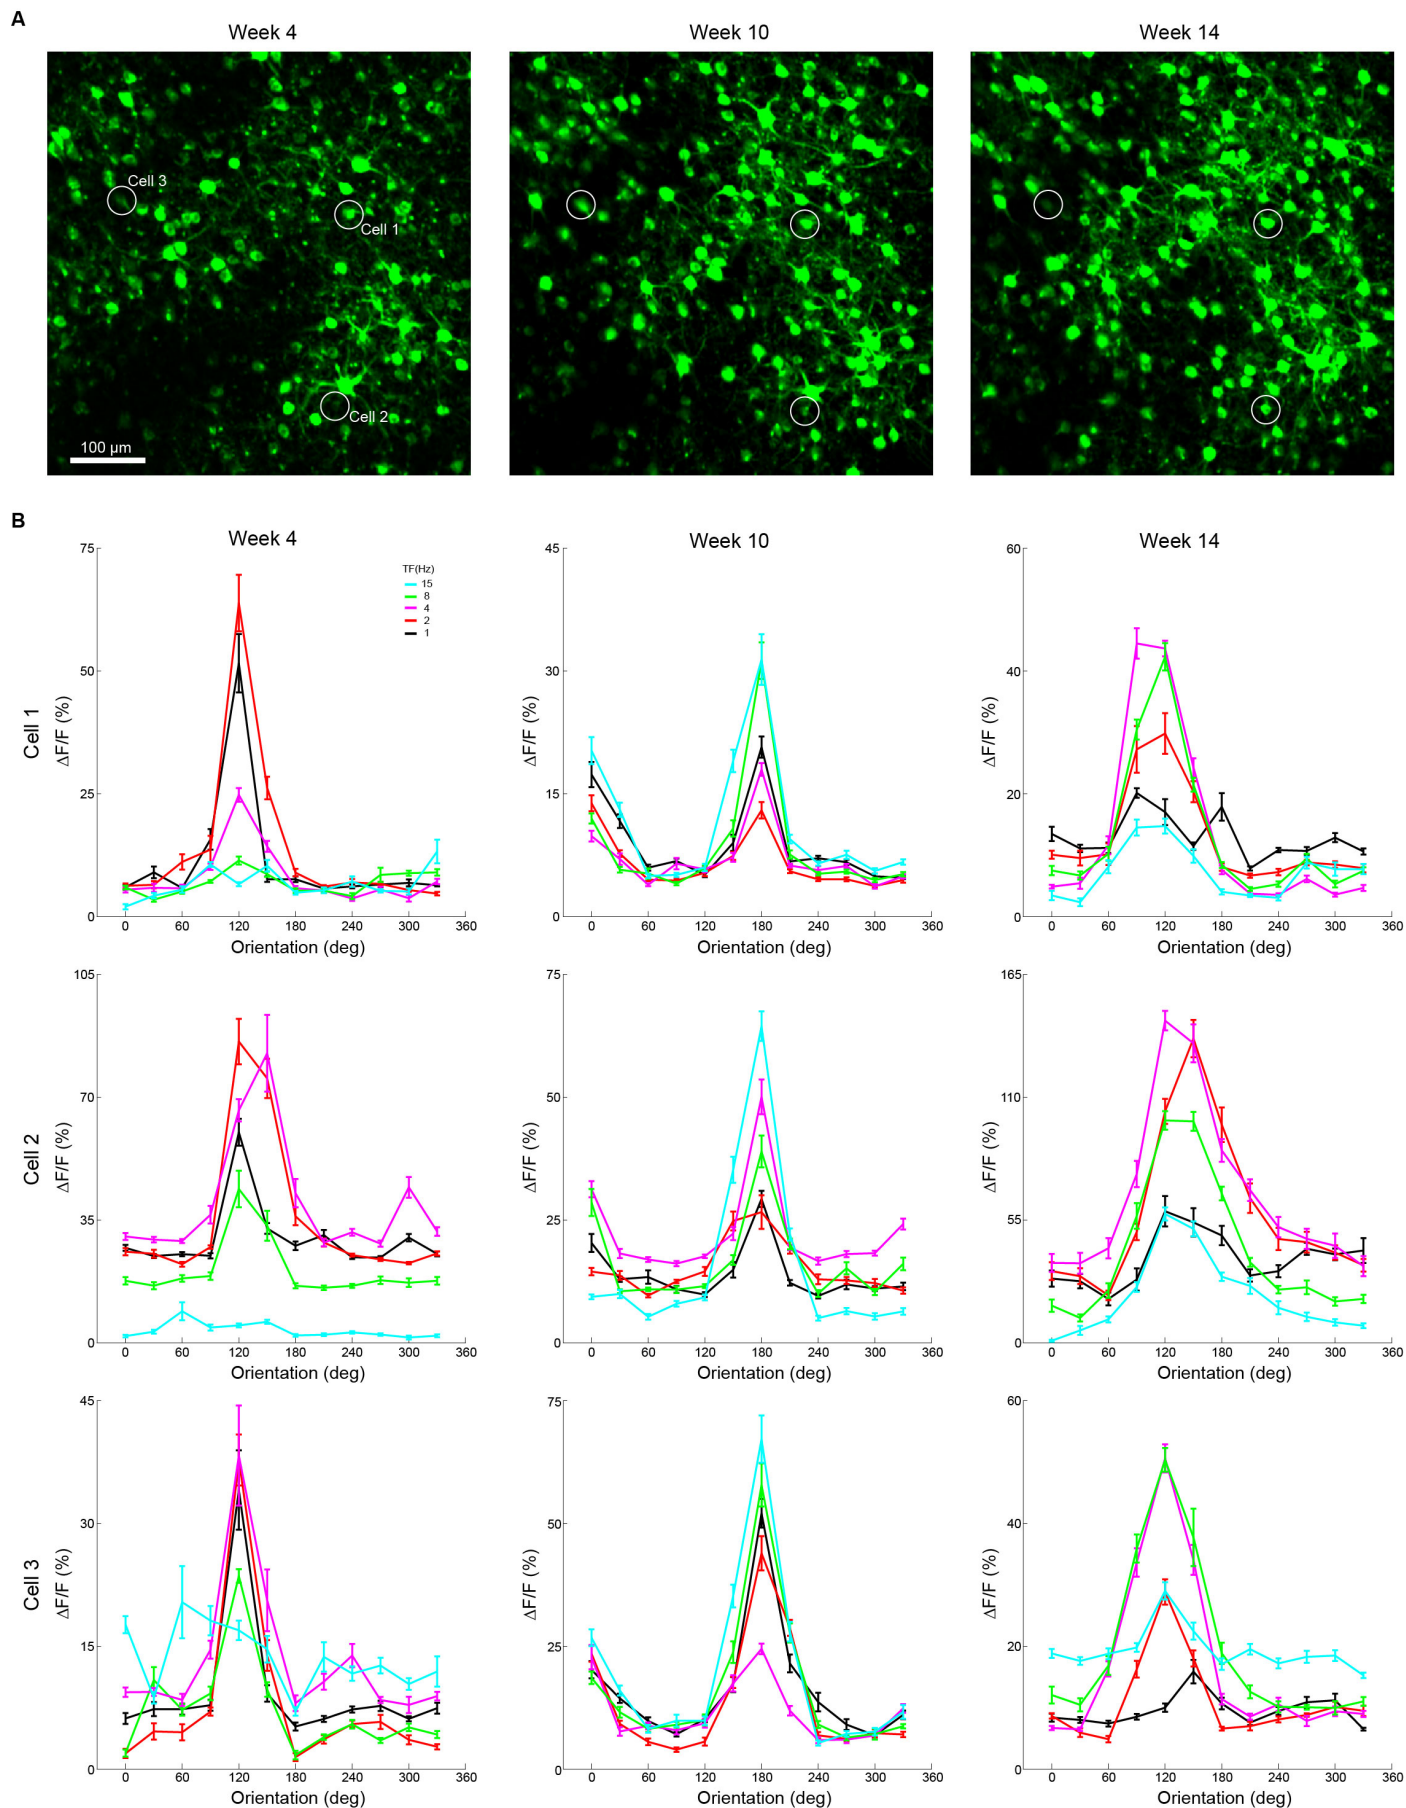

833  
834  
835

**Figure S5. More examples showing long-term stability of orientation and temporal frequency tuning in RV $\Delta$ L-Cre labeled neurons, Related to Figure 4**

836 (A) Maximum intensity projections of the same FOV at 4 weeks, 10 weeks, and 14 weeks postinjection.  
837 Scale bar: 100  $\mu\text{m}$ , applies to all images.  
838 (B) Visual responses of the three circled cells in panel a measured at the three different timepoints. Data  
839 were obtained with drifting gratings presented at 12 directions of motion and 5 temporal frequencies (mean  
840  $\Delta F/F \pm \text{s.e.m.}$ , averaged over 10 repeats).  
841  
842

843 **Video S2. GCaMP6s signals of visual cortical neurons 16 weeks after injection of RV $\Delta$ L-Cre, Related**  
844 **to Figure 4**

845 Video shows responses to 10 repeats of drifting gratings at 12 directions of motion at one temporal  
846 frequency (1 Hz) over a total of 480 seconds.

847

848 *See external file.*

849

850

851 **File S4. Tuned cell counts and statistics for functional two-photon imaging experiments, Related to**  
852 **Figure 4**  
853  
854 *See following page.*
